# Supplementary material for: Mapping pQTLs of circulating inflammatory proteins identifies drivers of immune-related disease risk and novel therapeutic targets
Source: bioRxiv or medRxiv preprint supplement (doi:10.1101/2023.03.24.23287680), 2023-03-28

4EBP1 (EIF4EBP1)

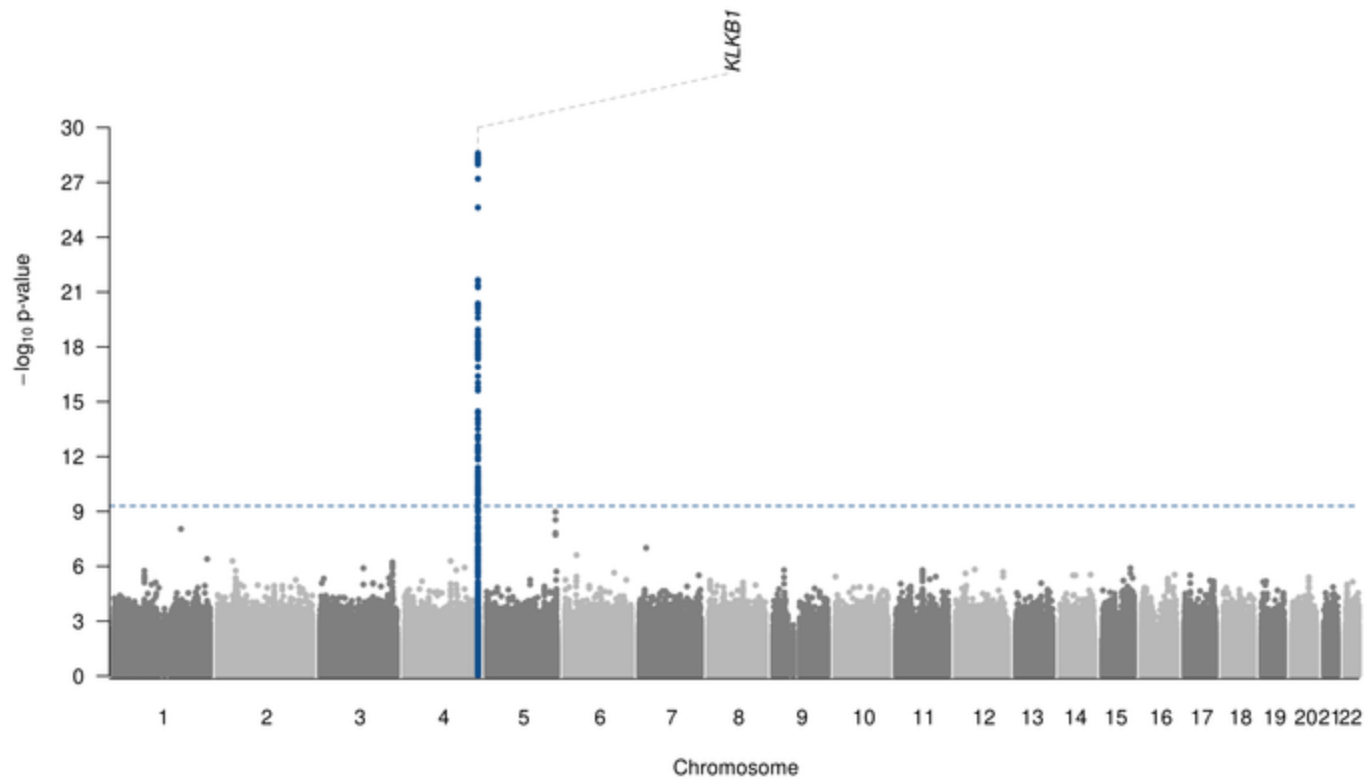

4EBP1 (EIF4EBP1)

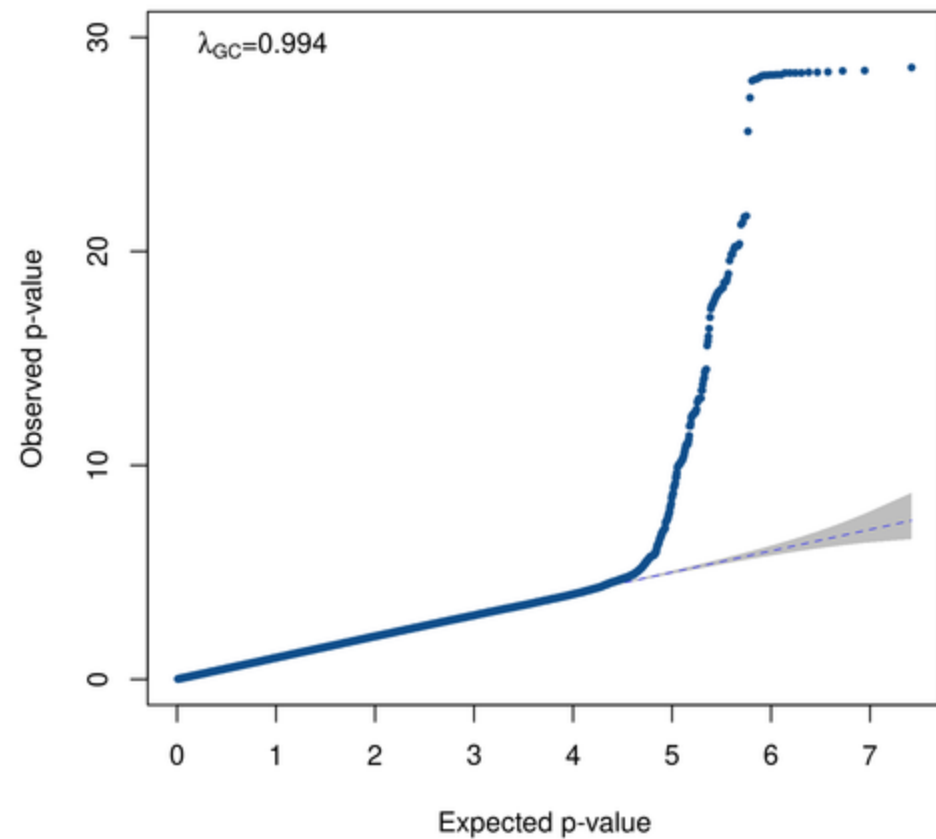

ADA (ADA)

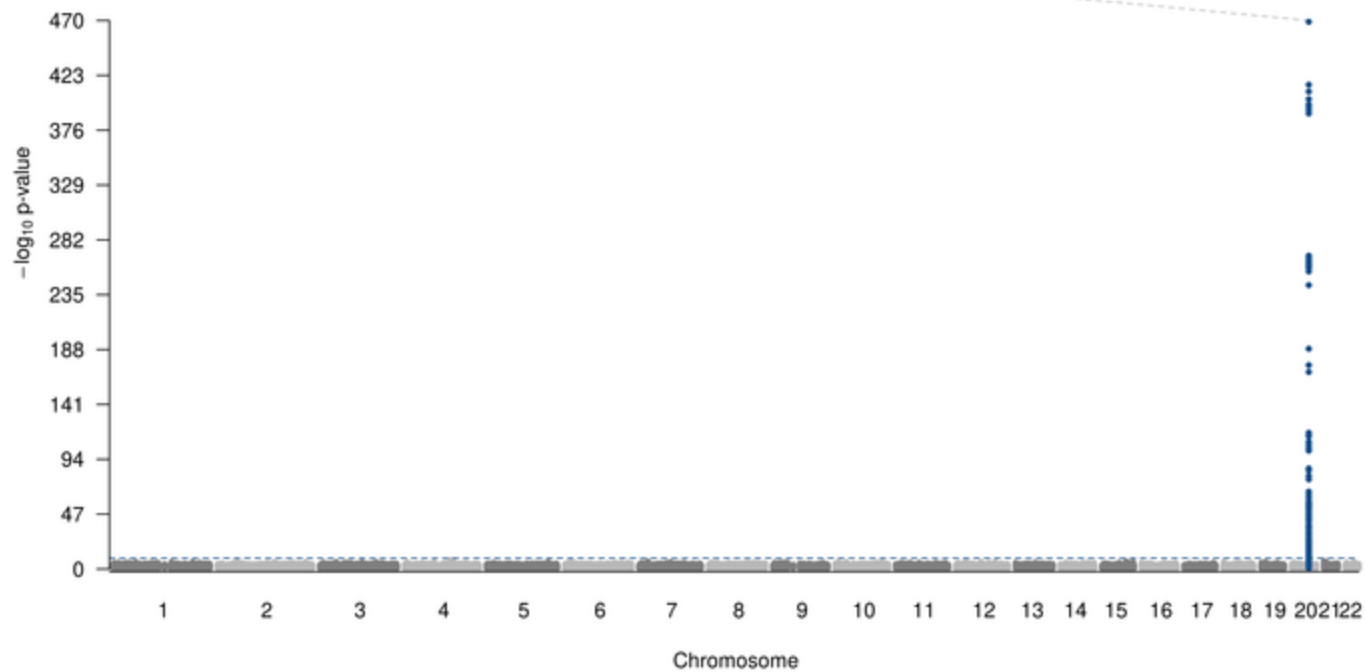

ADA (ADA)

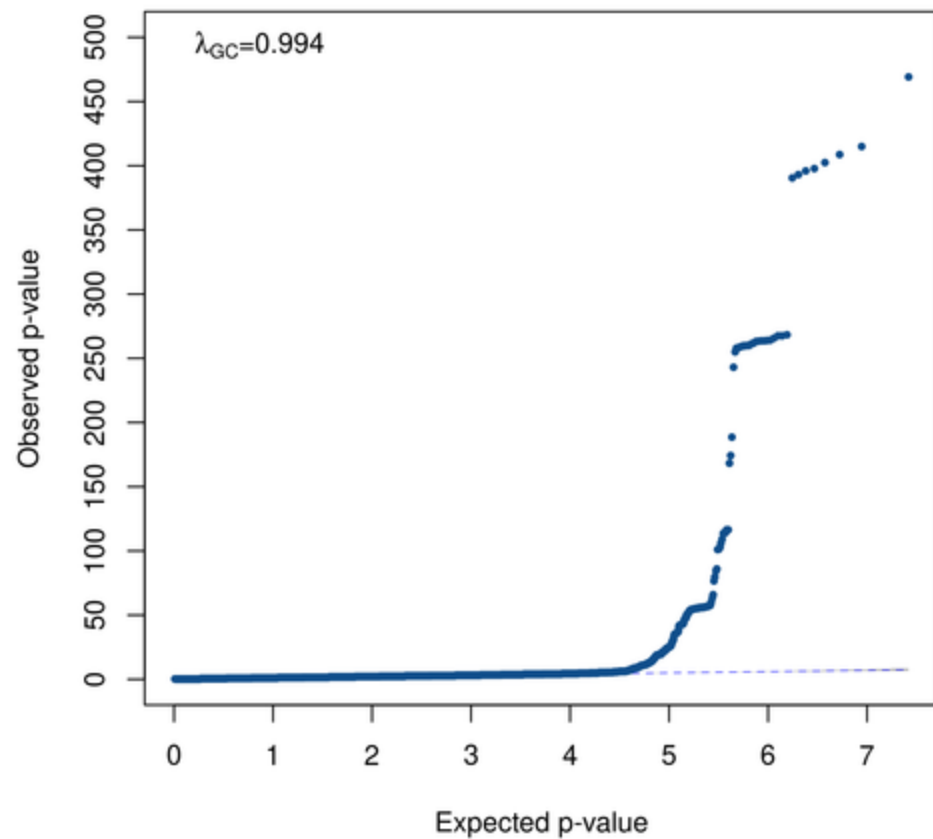

ARTN (ARTN)

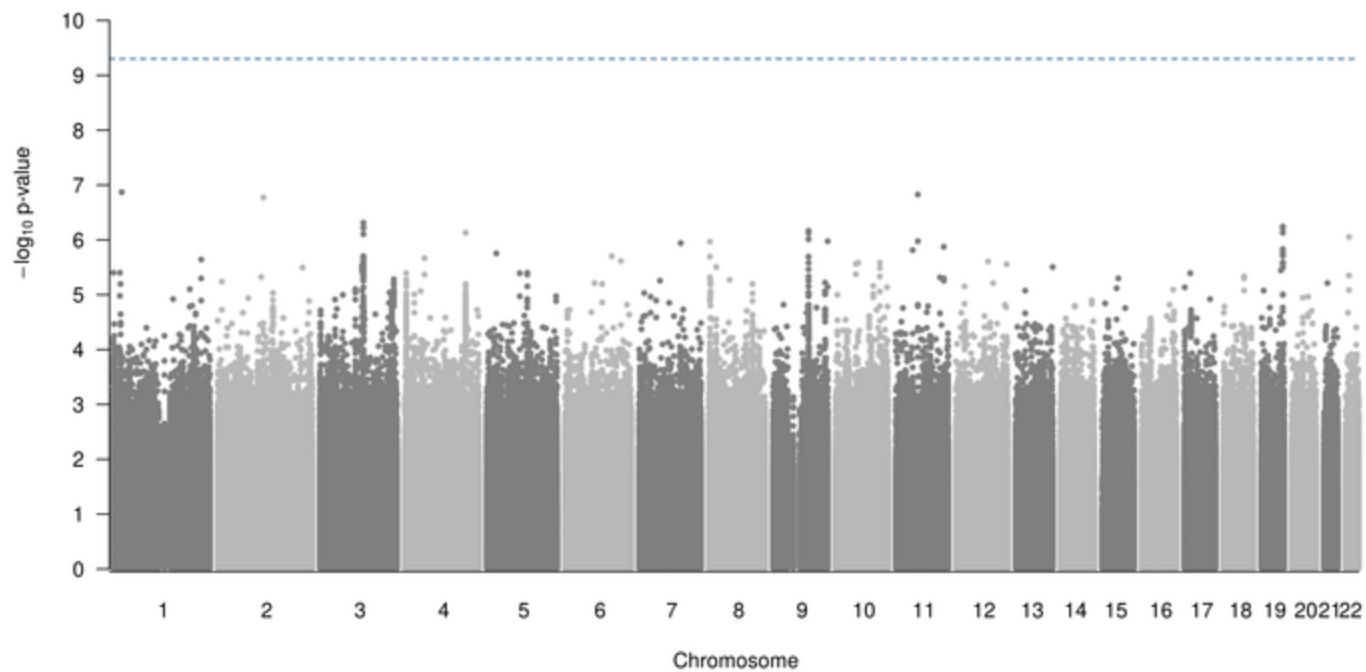

ARTN (ARTN)

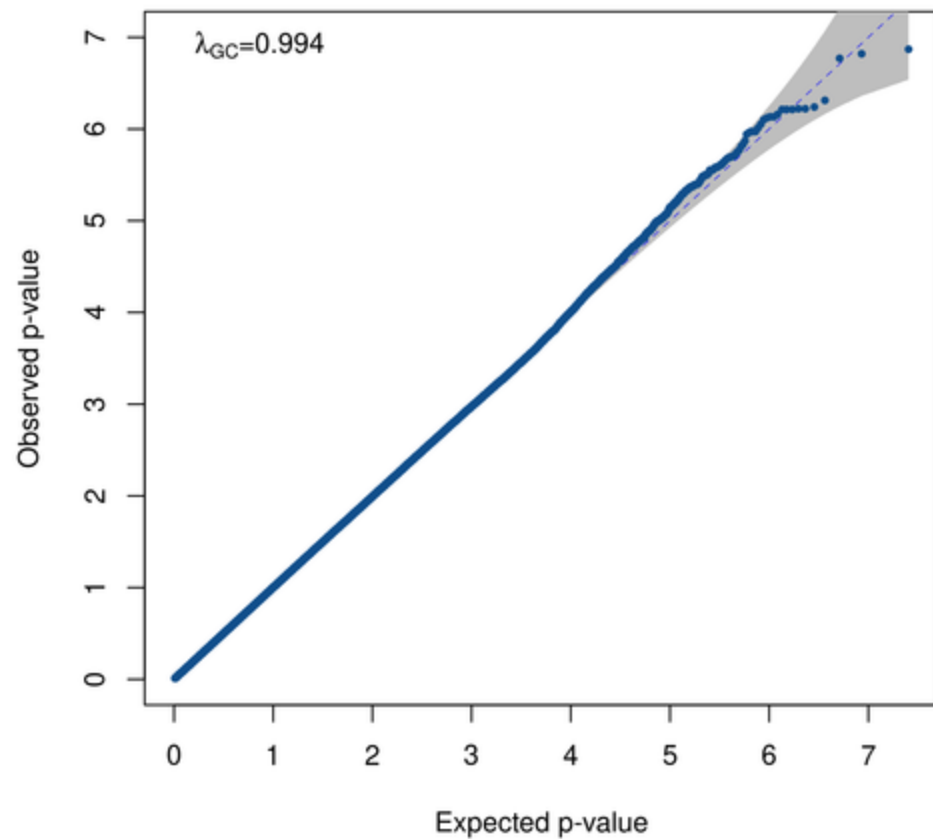

AXIN1 (AXIN1)

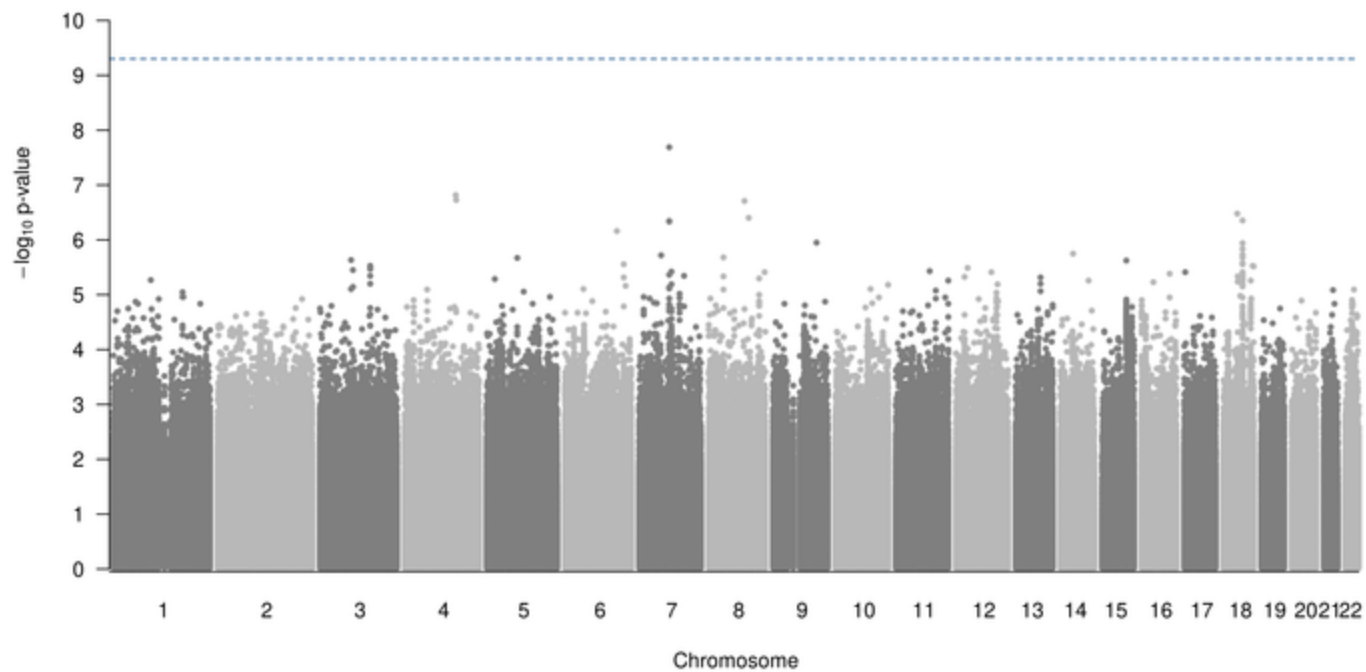

AXIN1 (AXIN1)

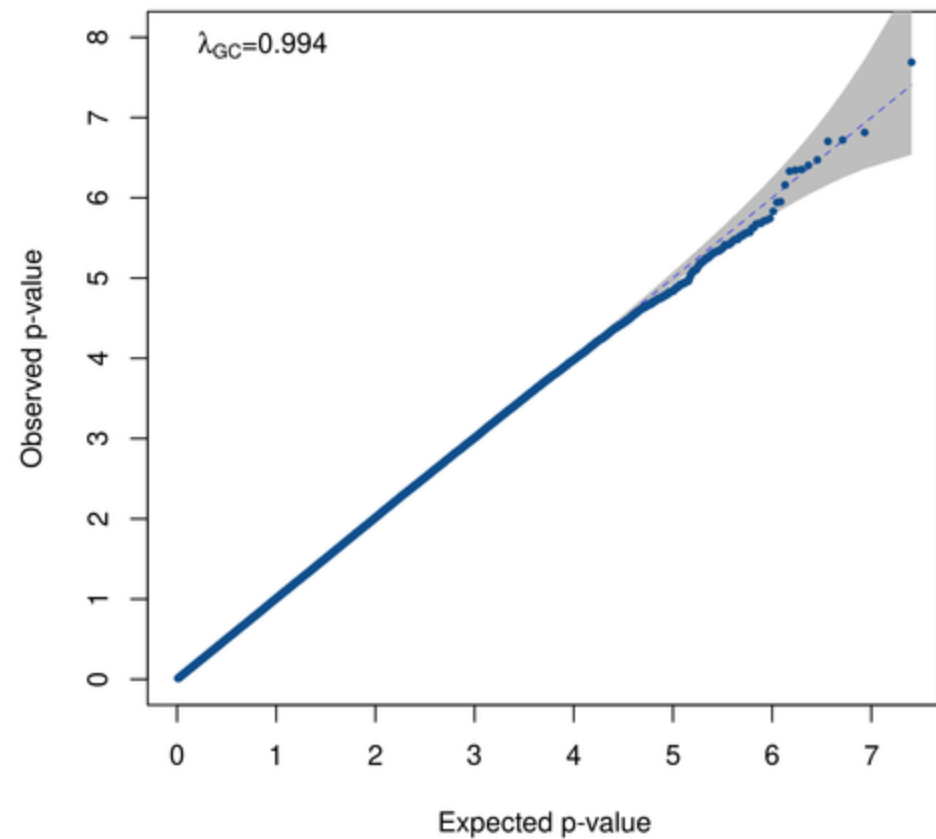

Beta-NGF (NGF)

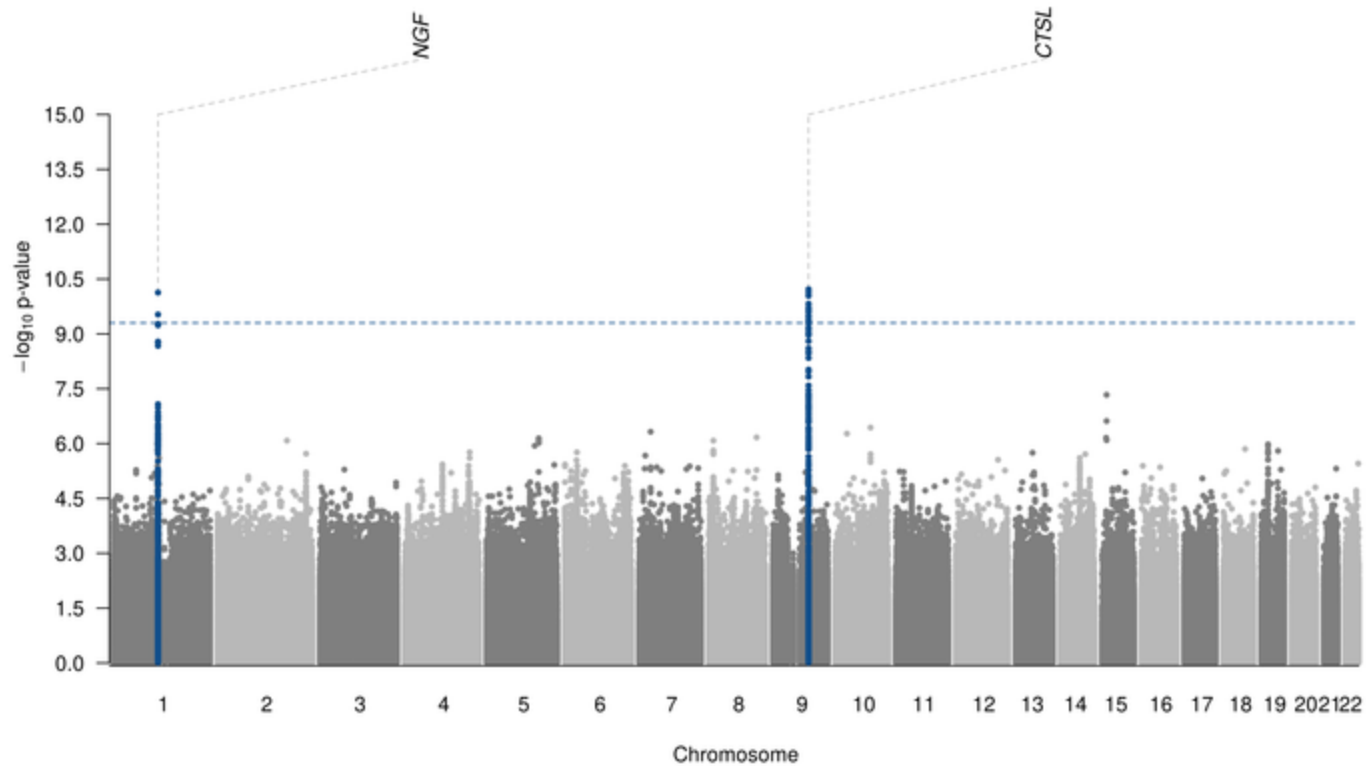

Beta-NGF (NGF)

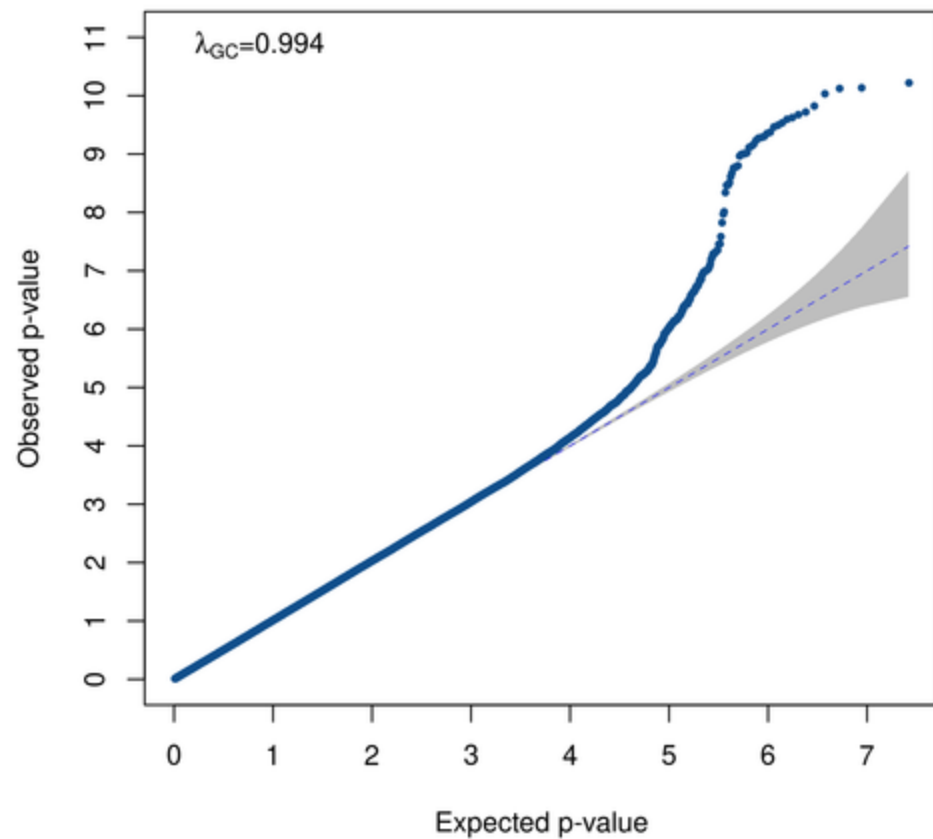

CASP-8 (CASP8)

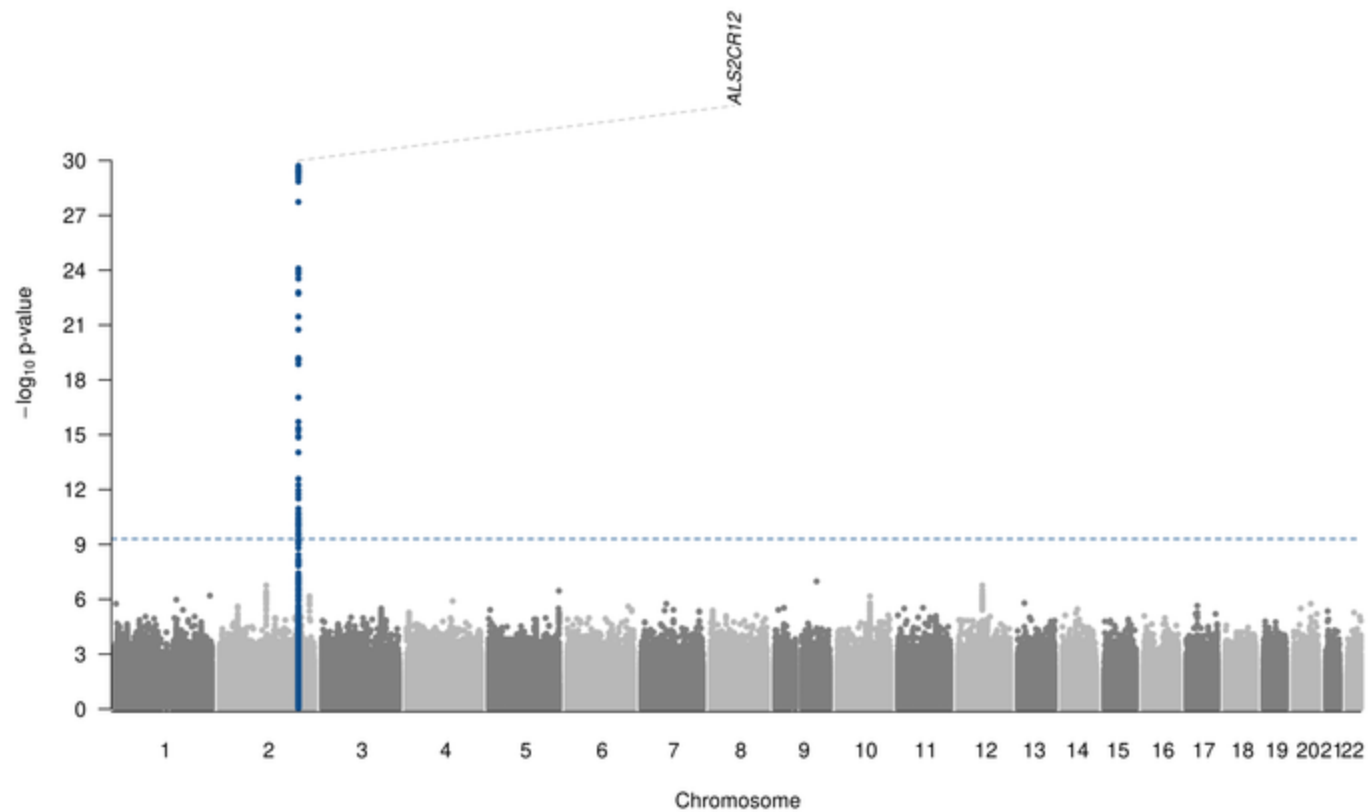

CASP-8 (CASP8)

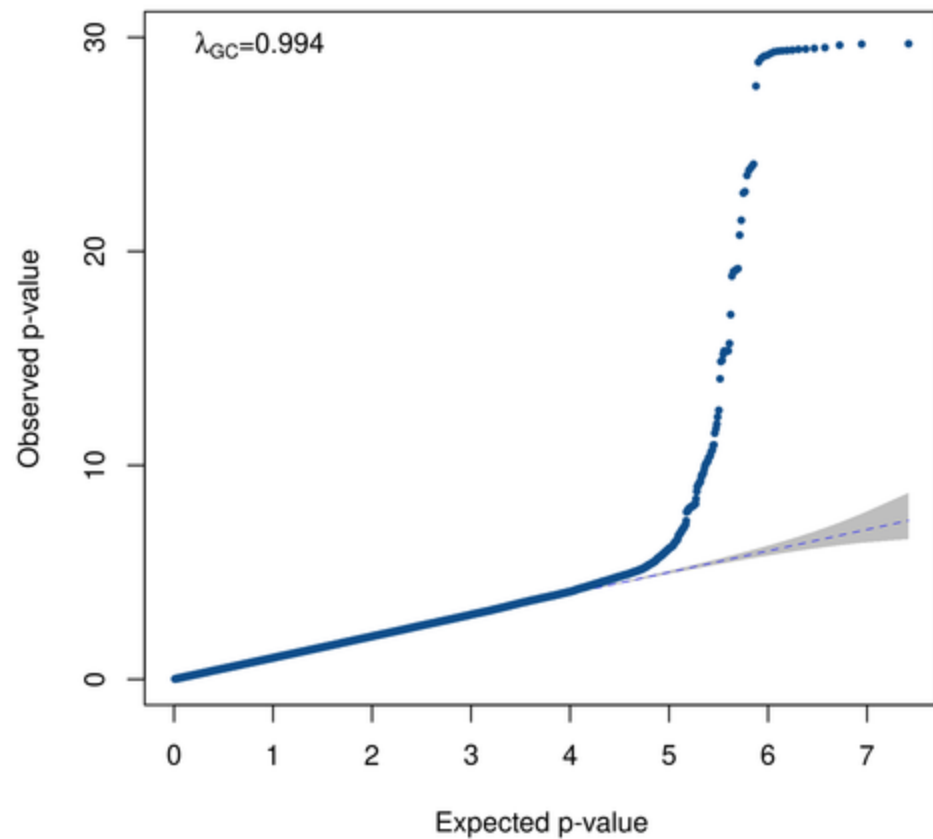

CCL11 (CCL11)

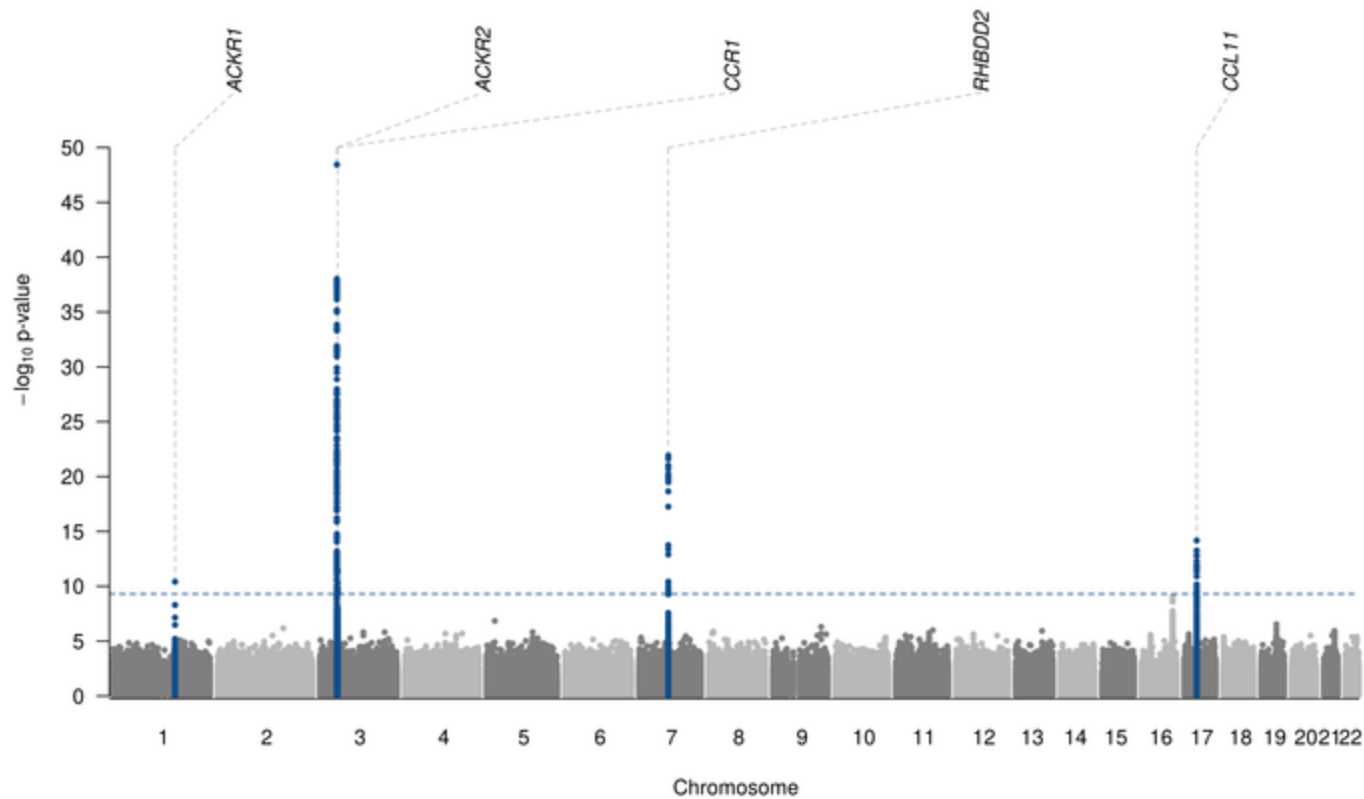

CCL11 (CCL11)

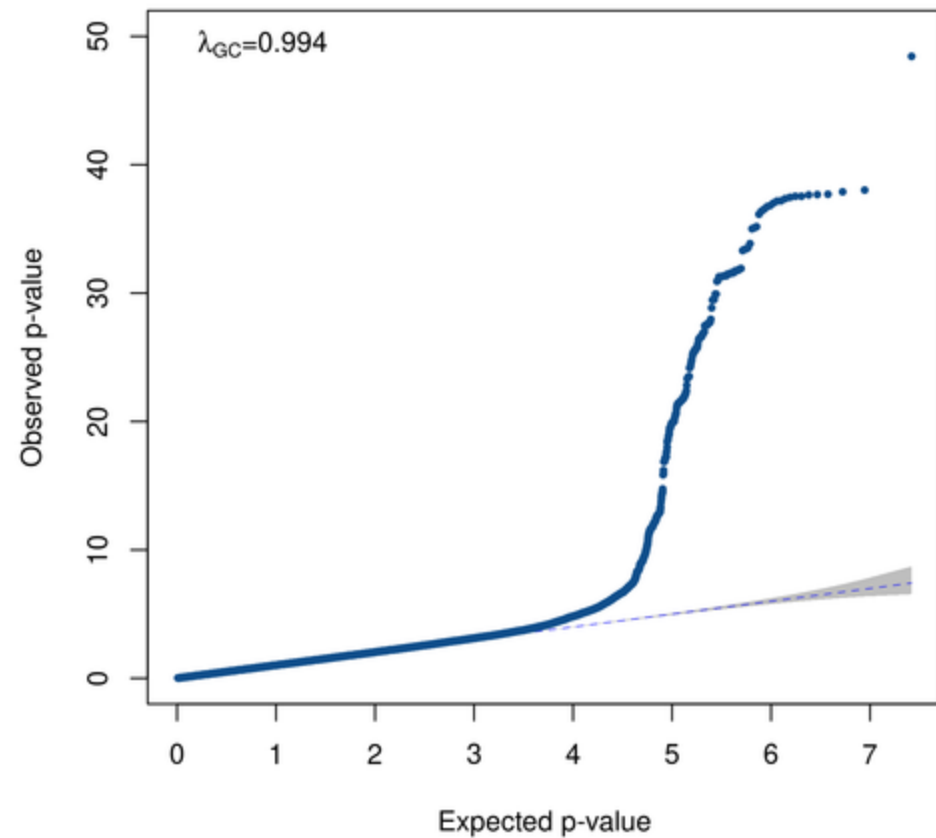

CCL19 (CCL19)

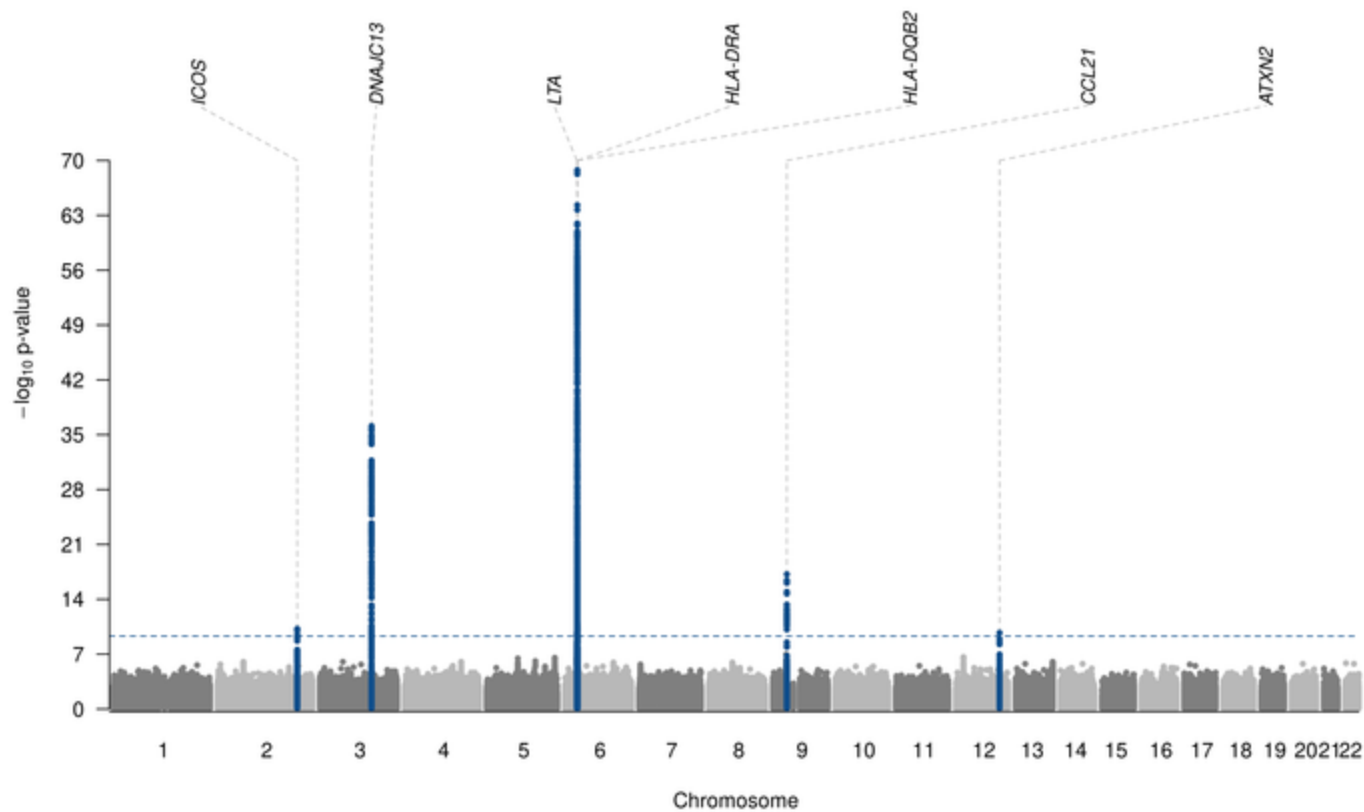

CCL19 (CCL19)

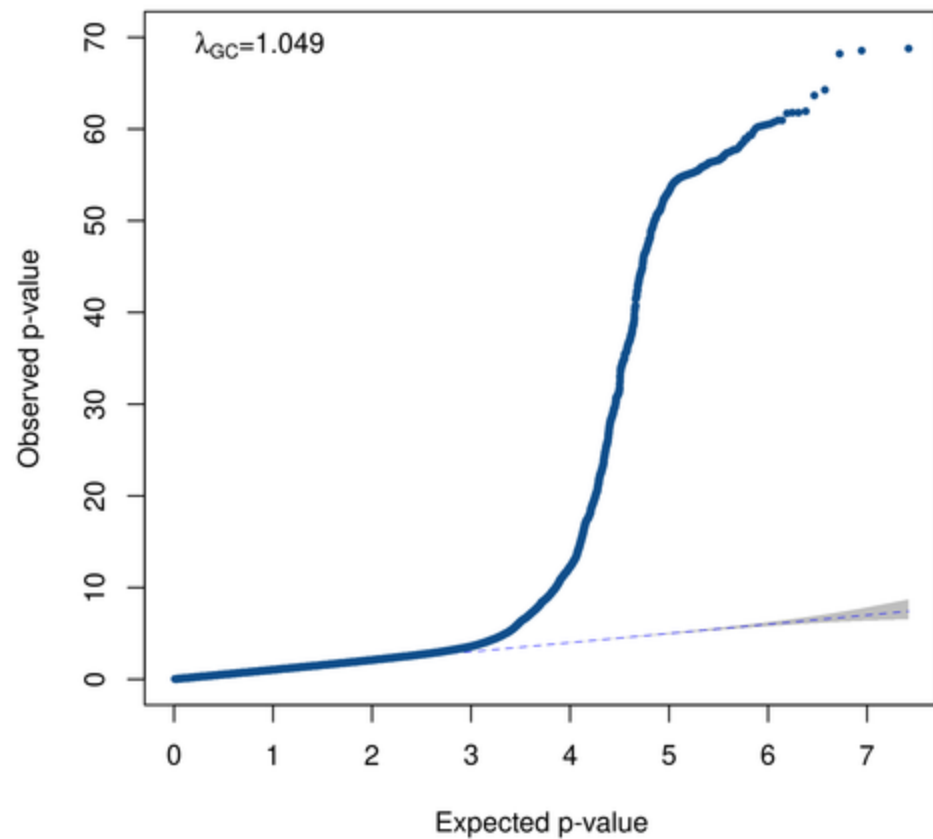



CCL20 (CCL20)

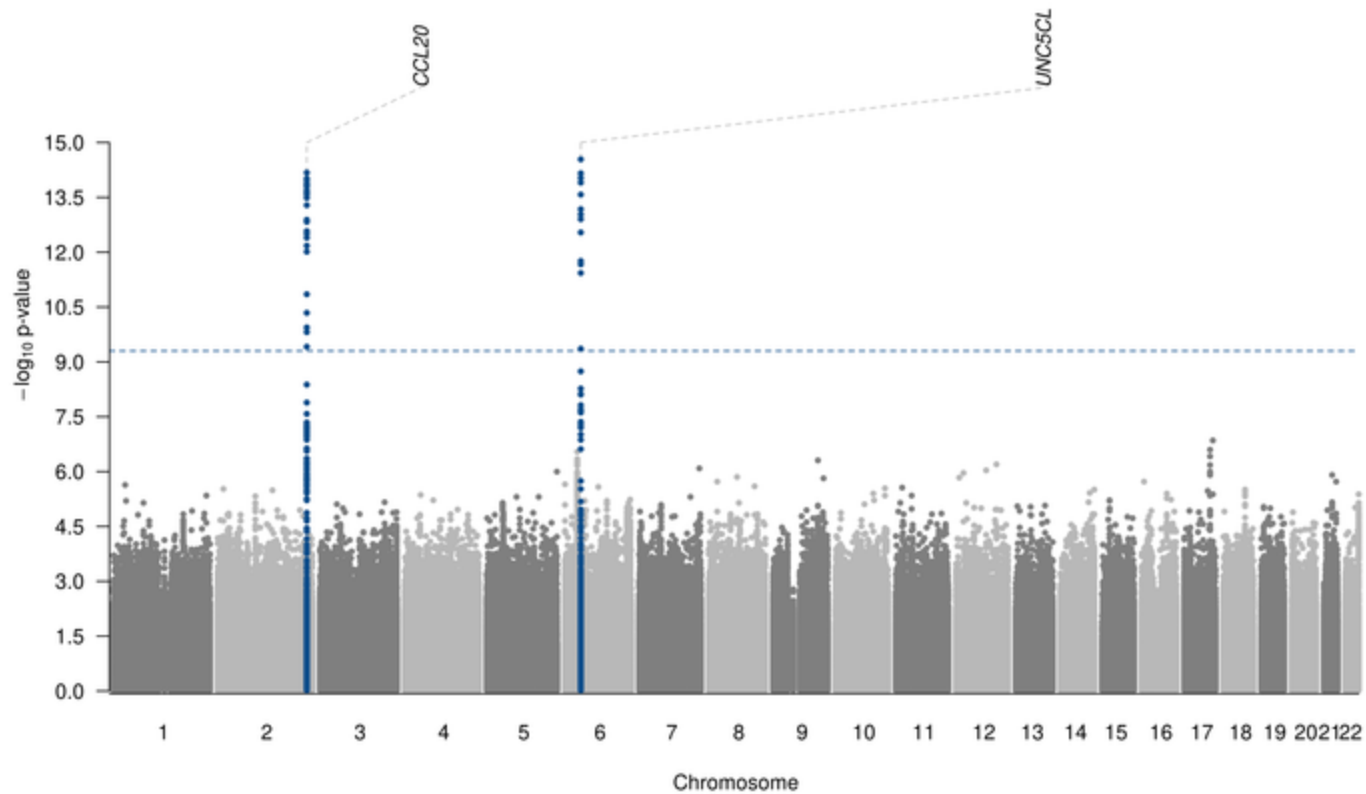

CCL20 (CCL20)

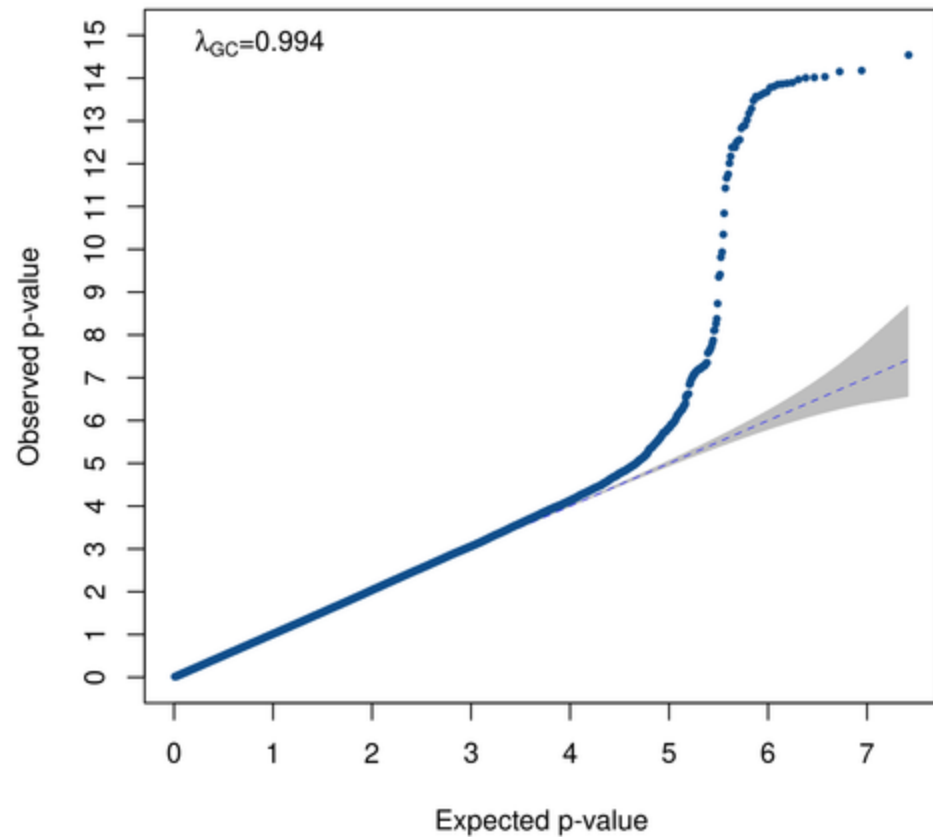

CCL23 (CCL23)

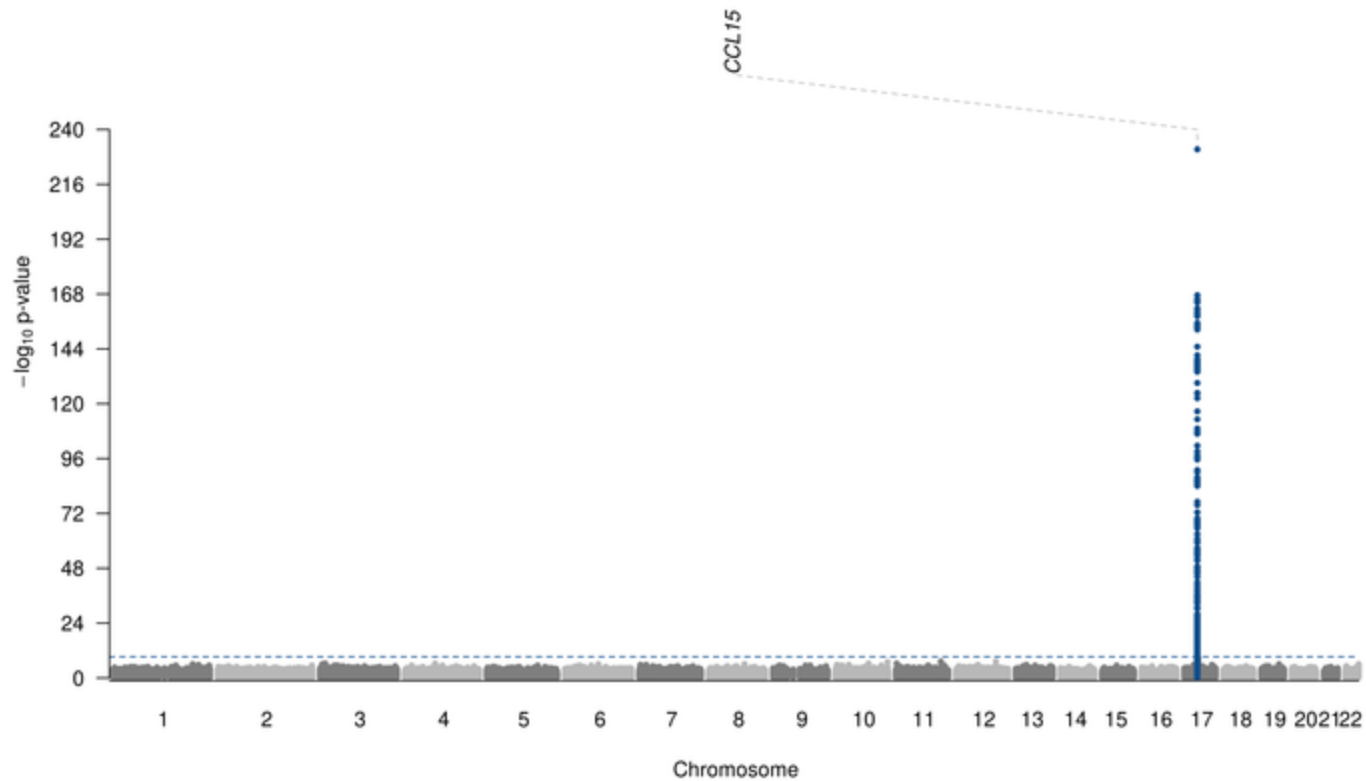

CCL23 (CCL23)

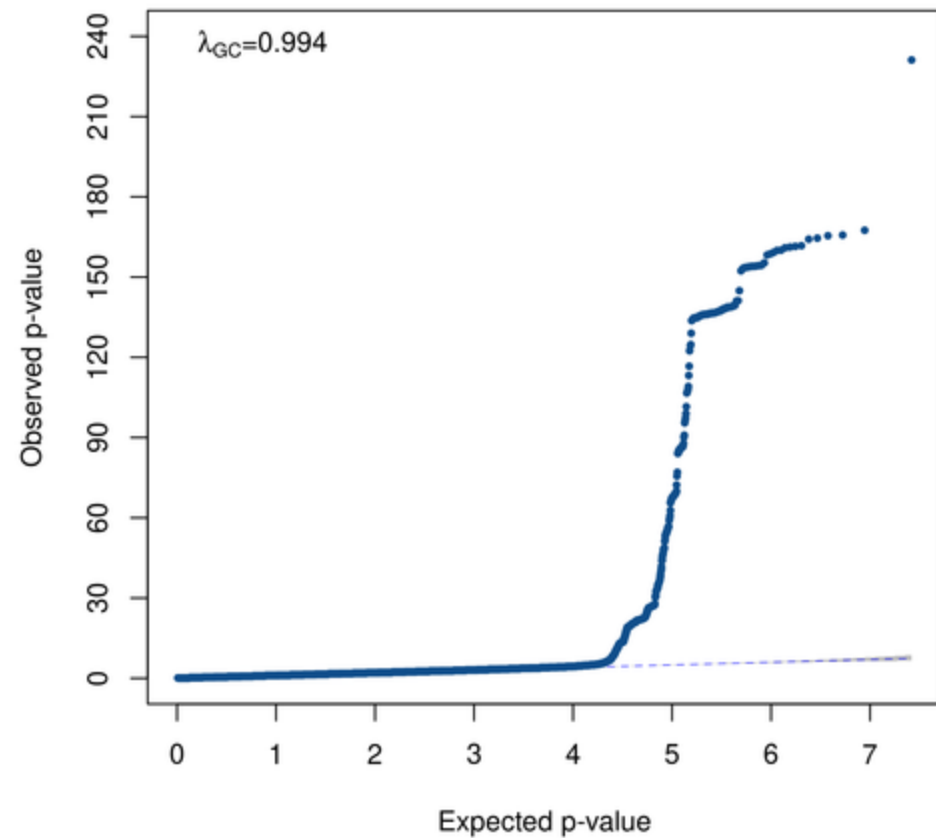

CCL25 (CCL25)

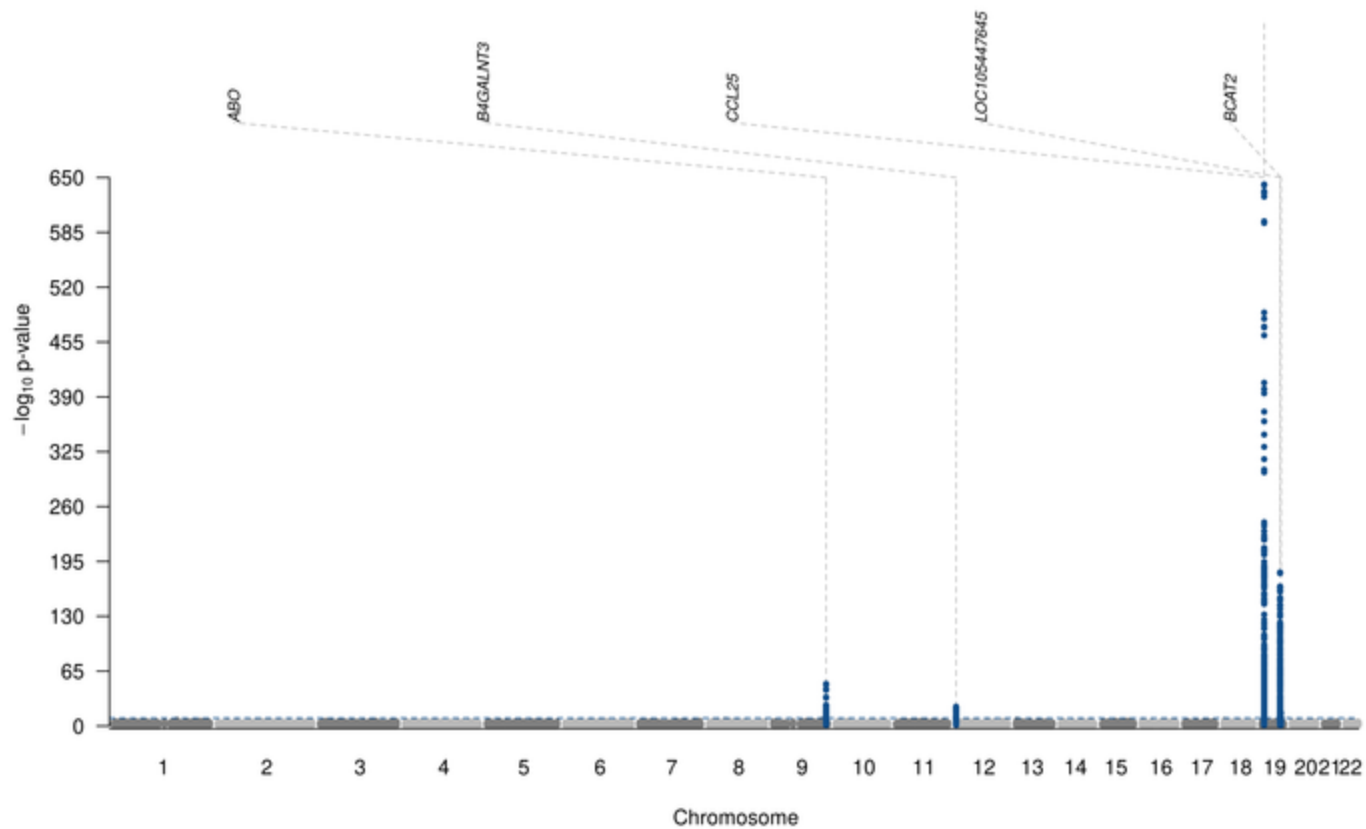

CCL25 (CCL25)

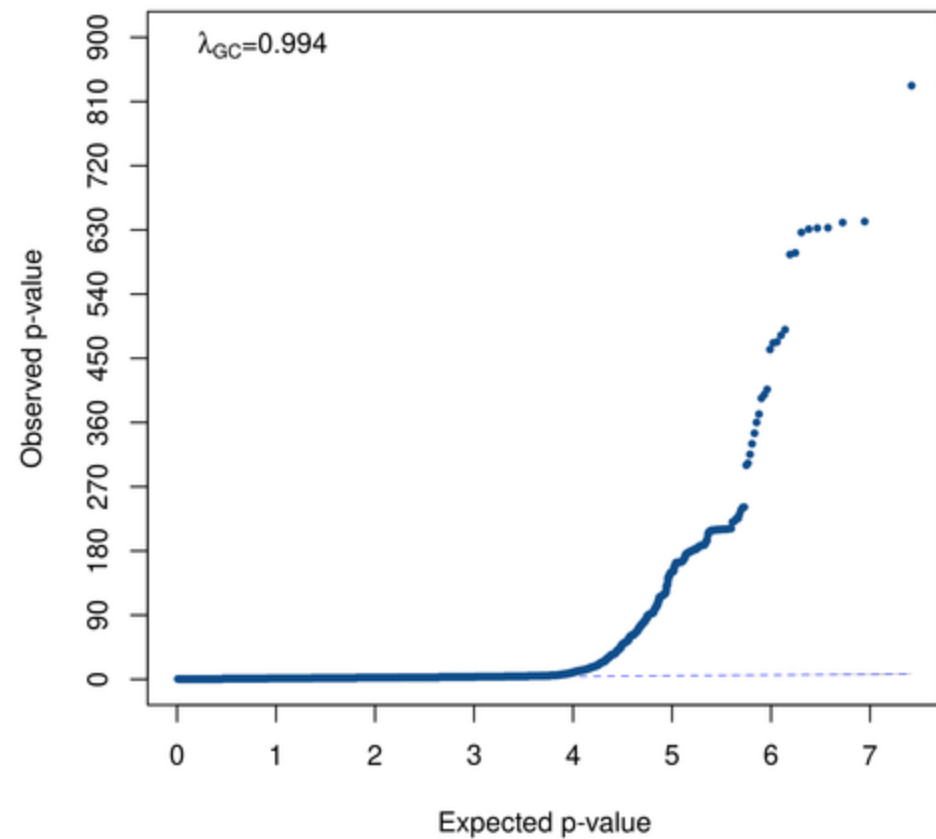

CCL28 (CCL28)

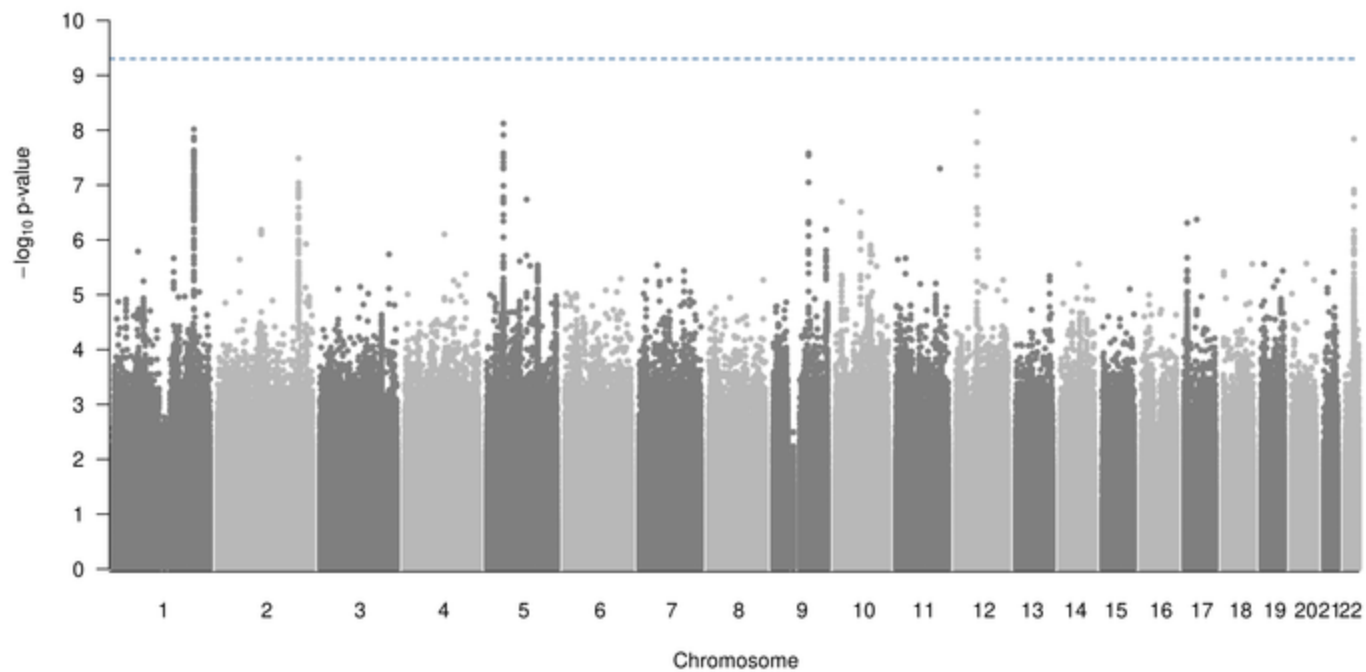

CCL28 (CCL28)

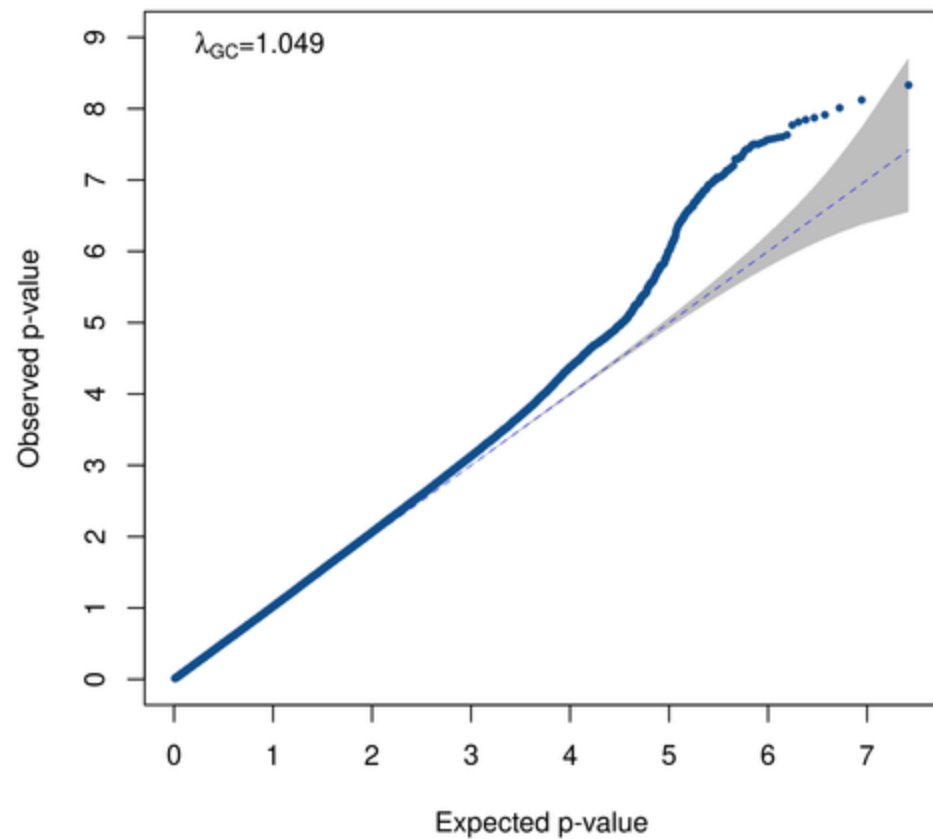

CCL4 (CCL4)

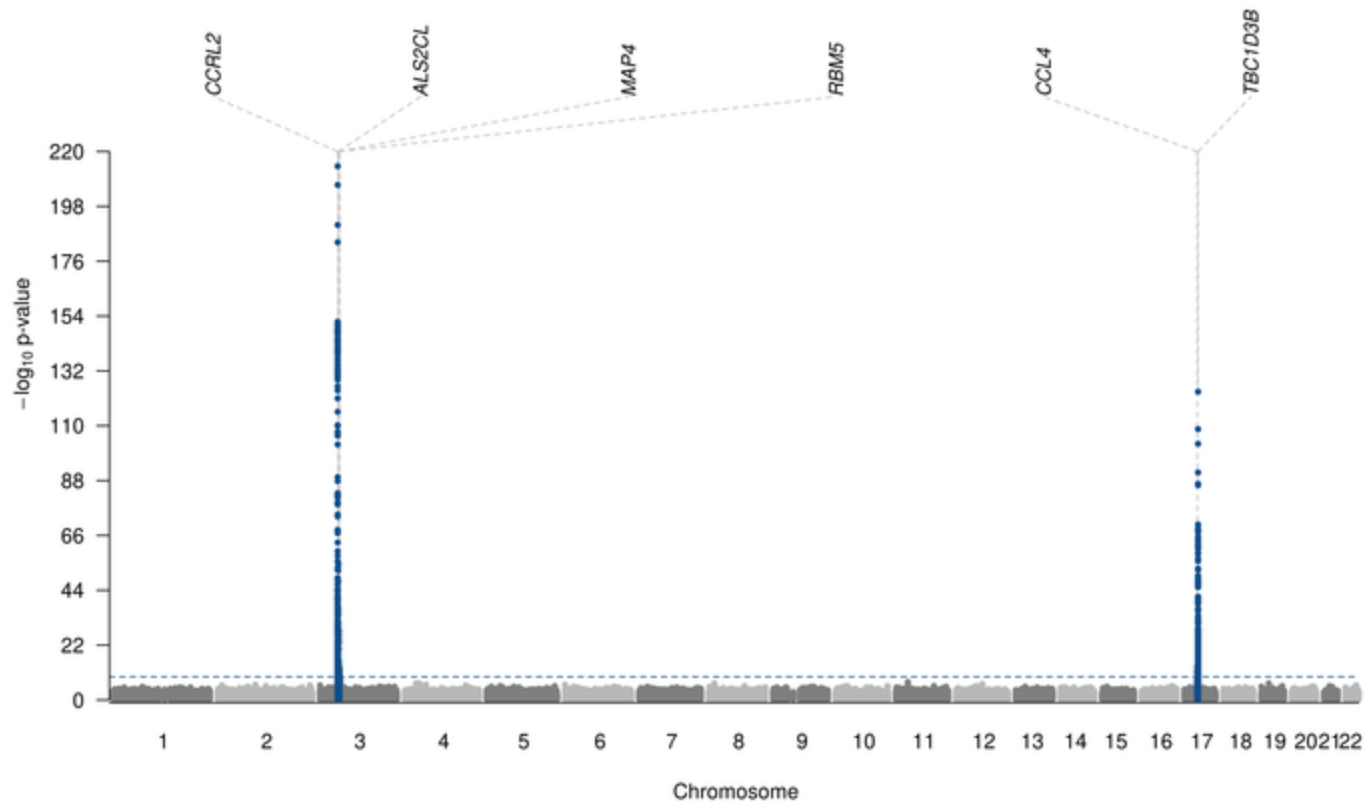

CCL4 (CCL4)

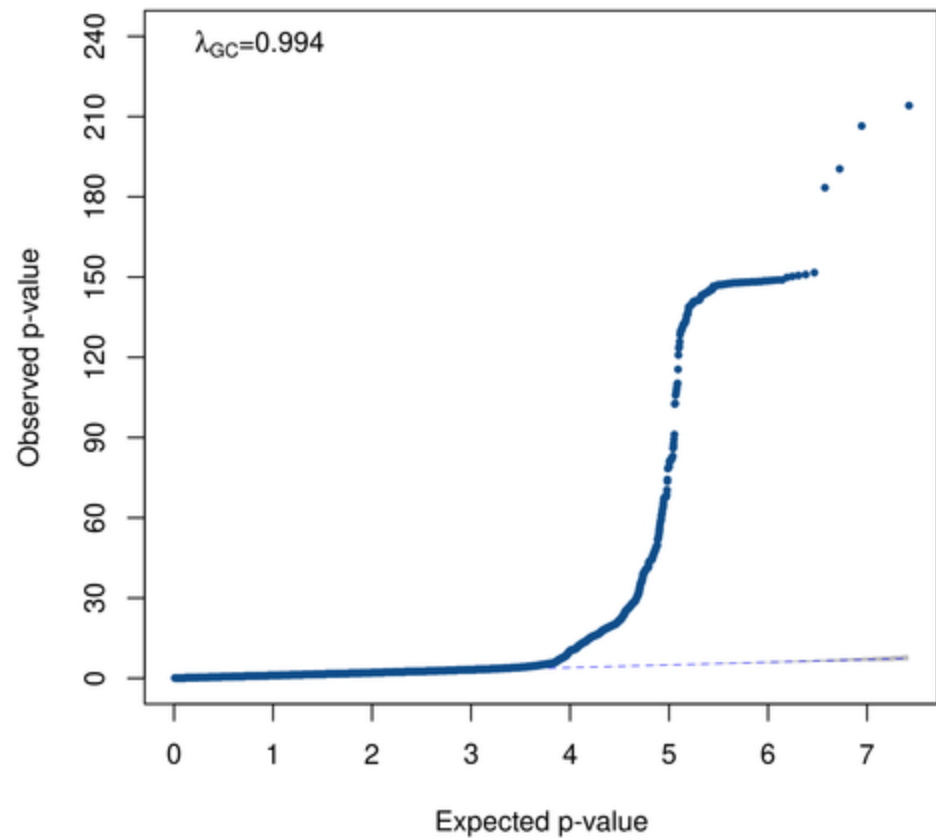

CD244 (CD244)

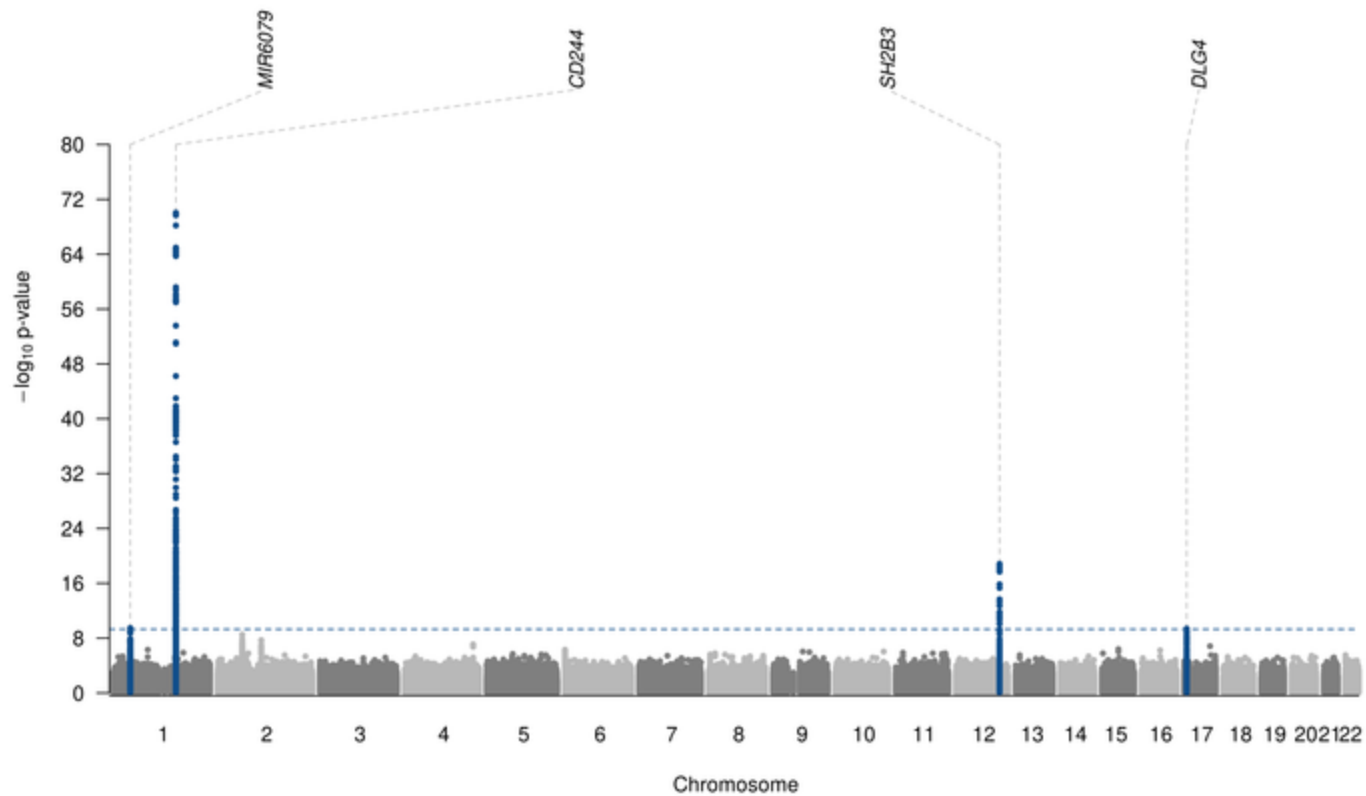

CD244 (CD244)

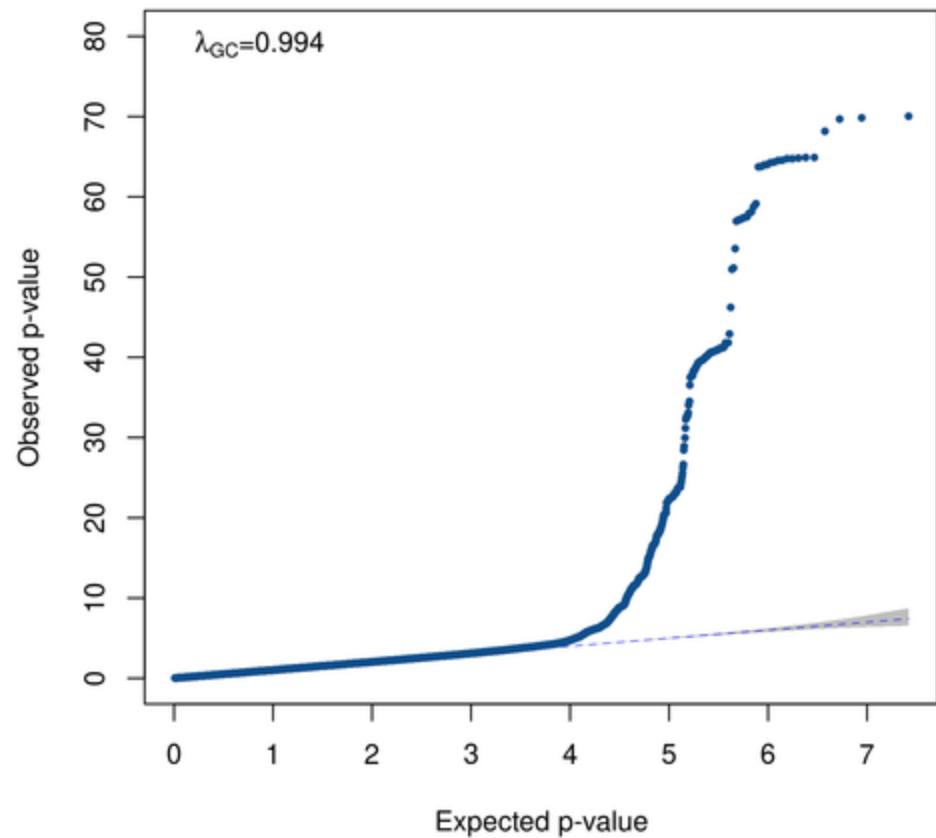

CD40 (CD40)

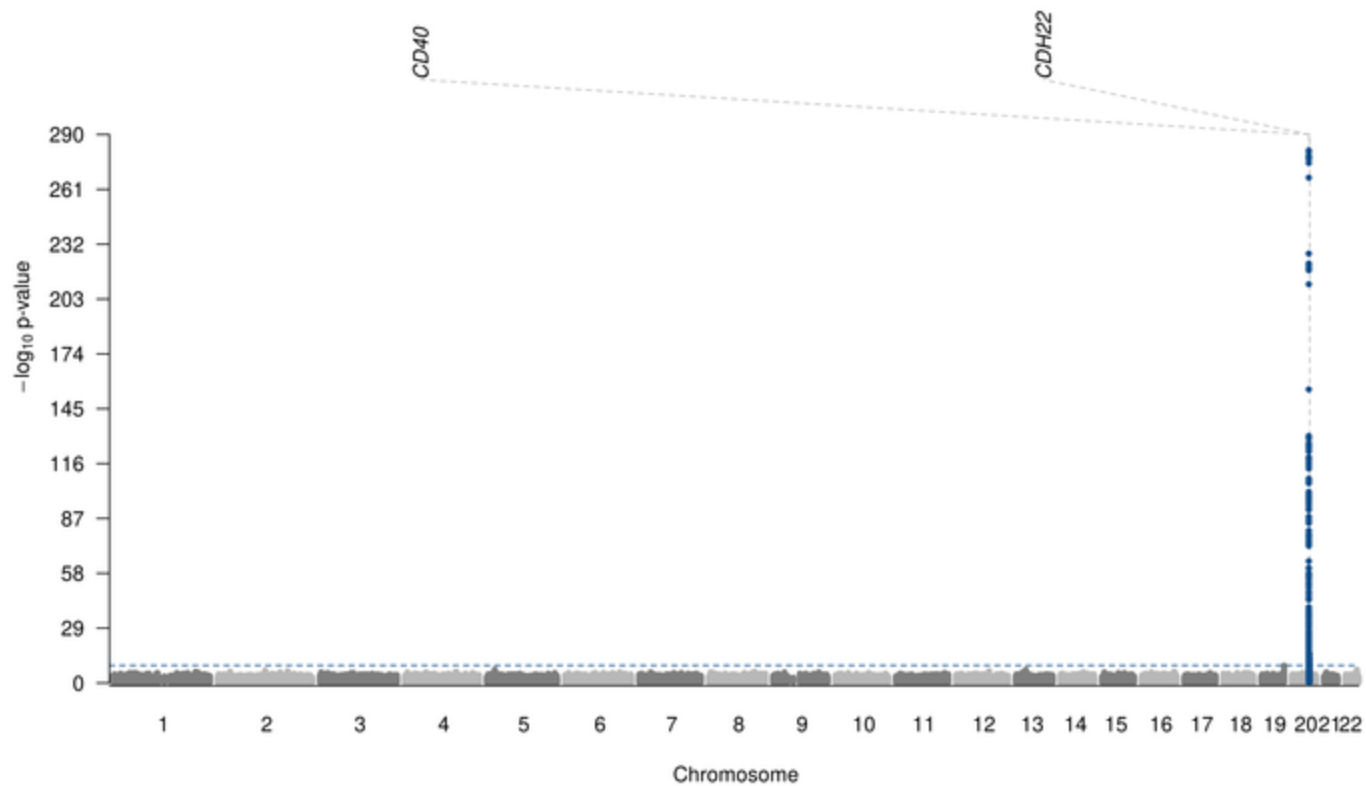

CD40 (CD40)

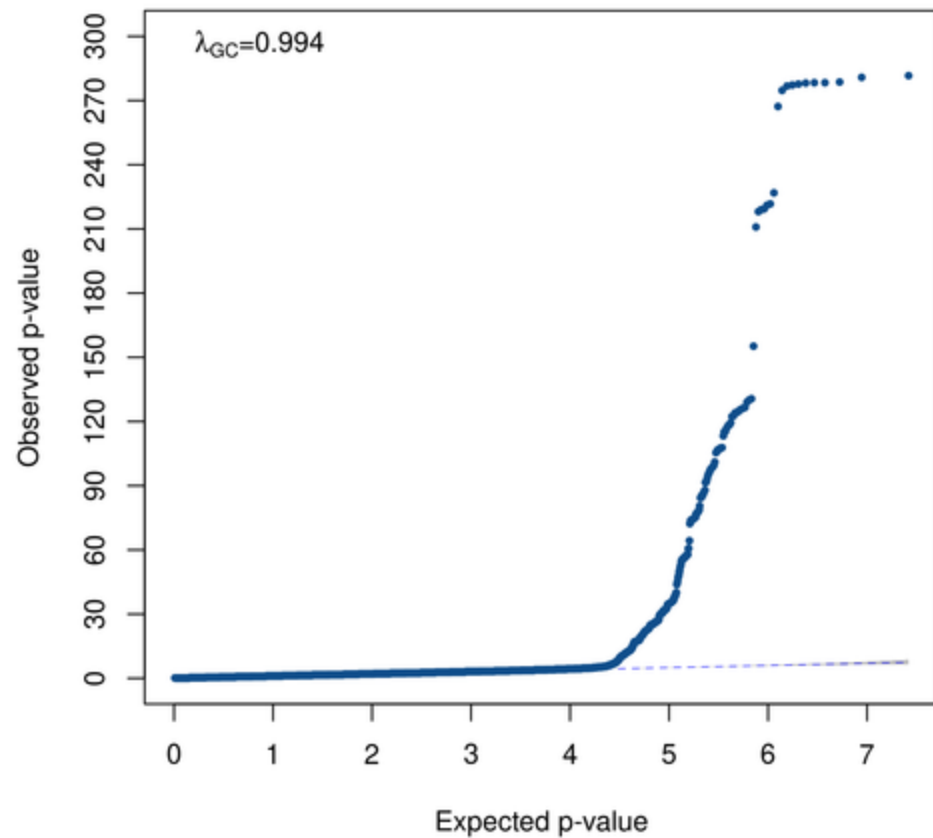

CD5 (CD5)

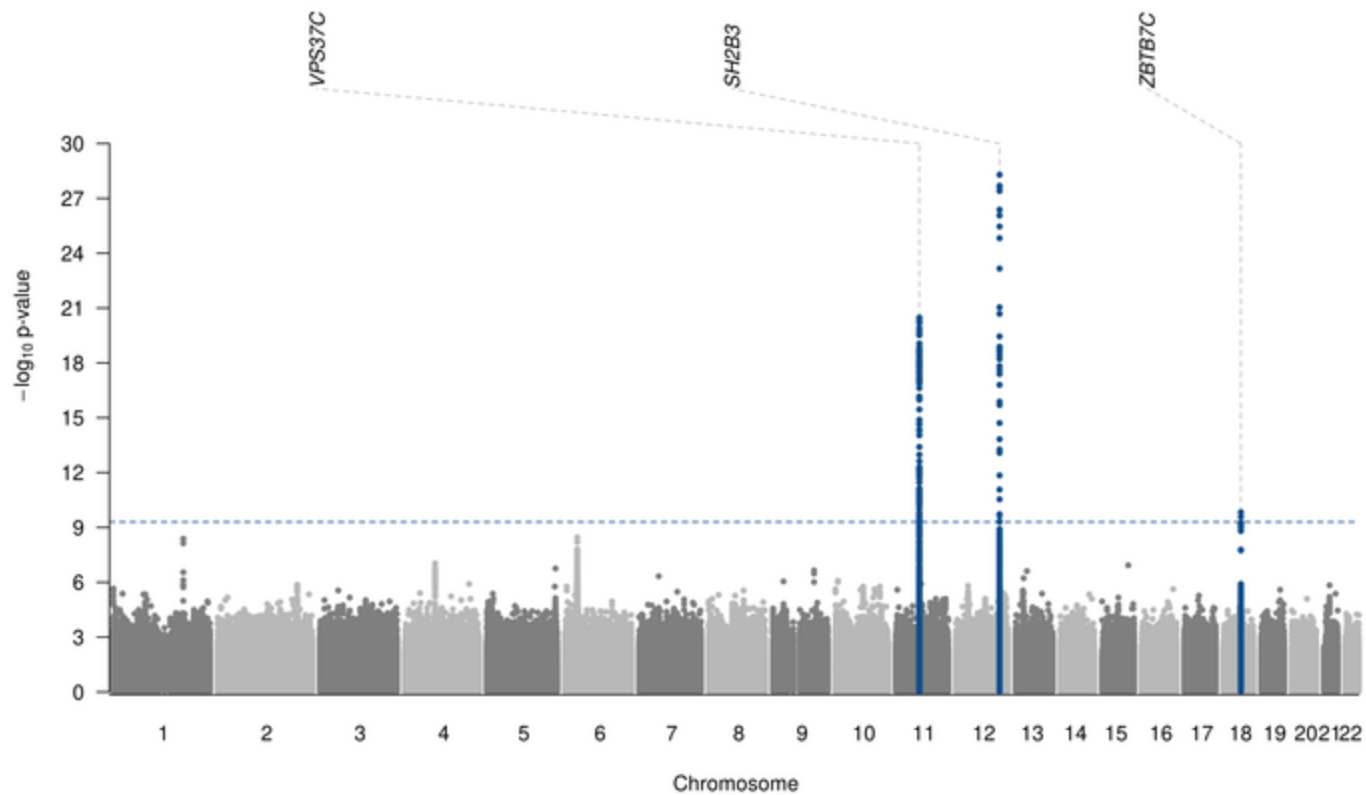

CD5 (CD5)

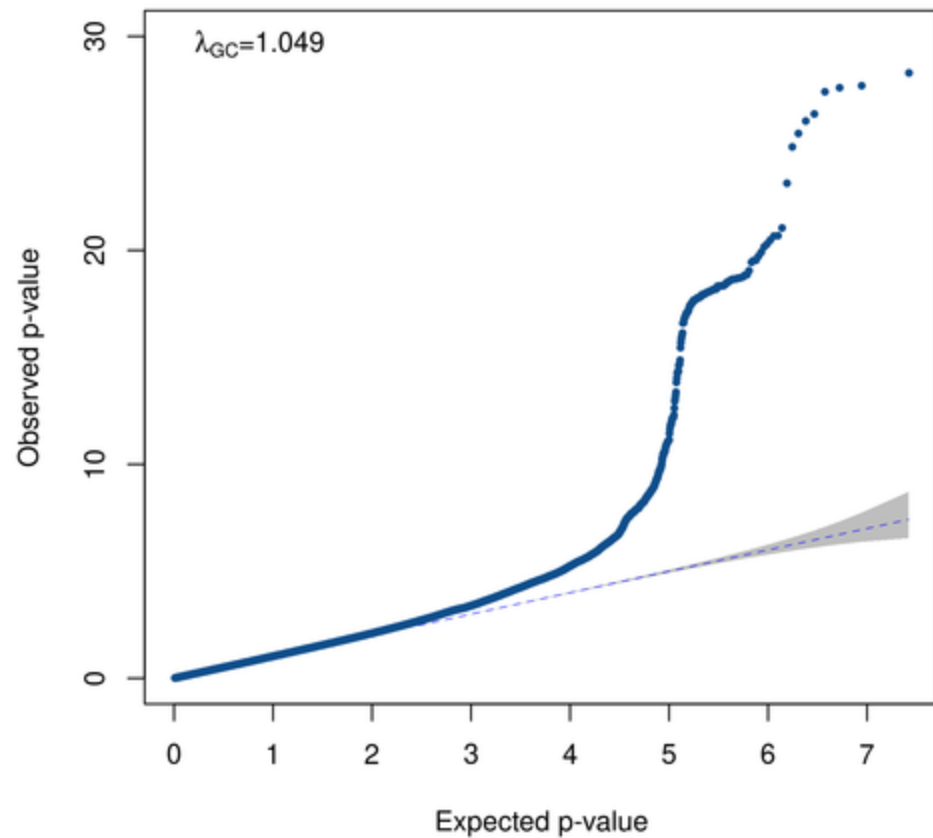



CD6 (CD6)

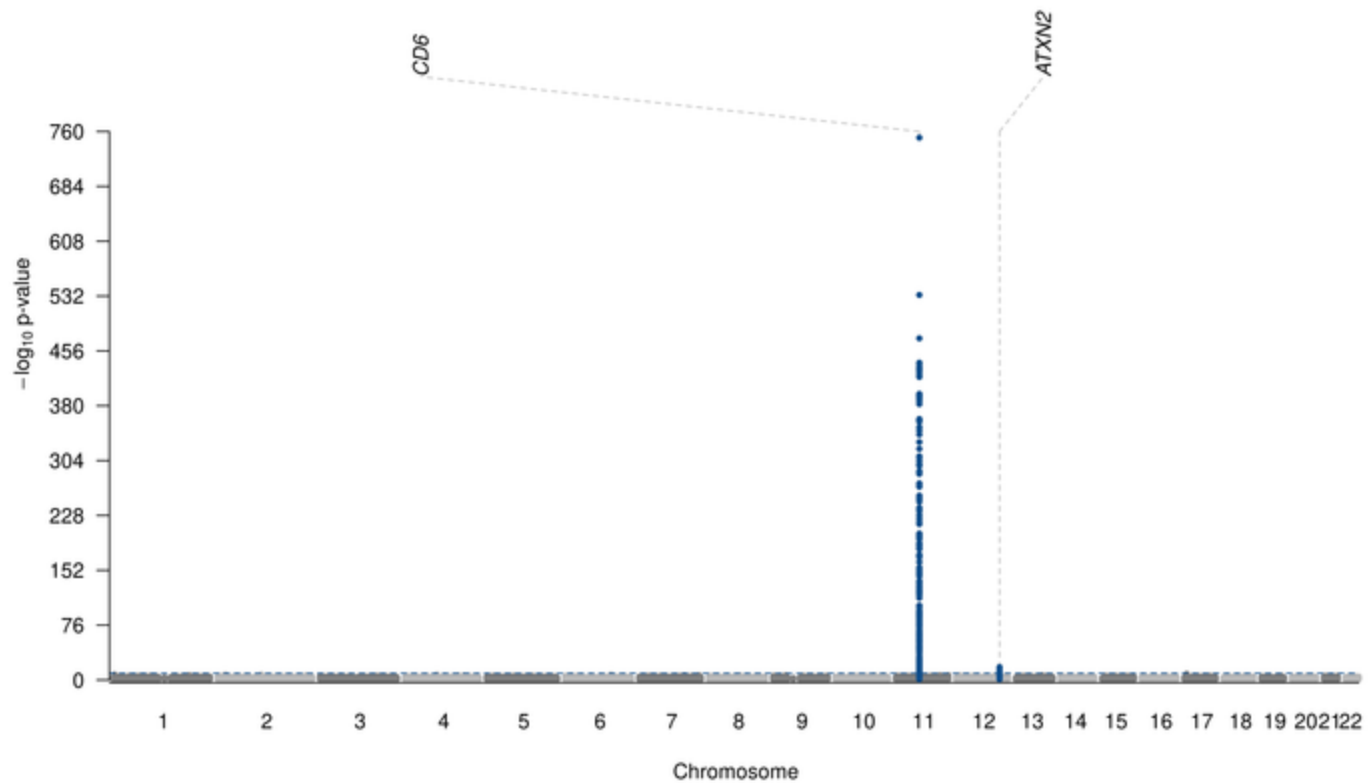

CD6 (CD6)

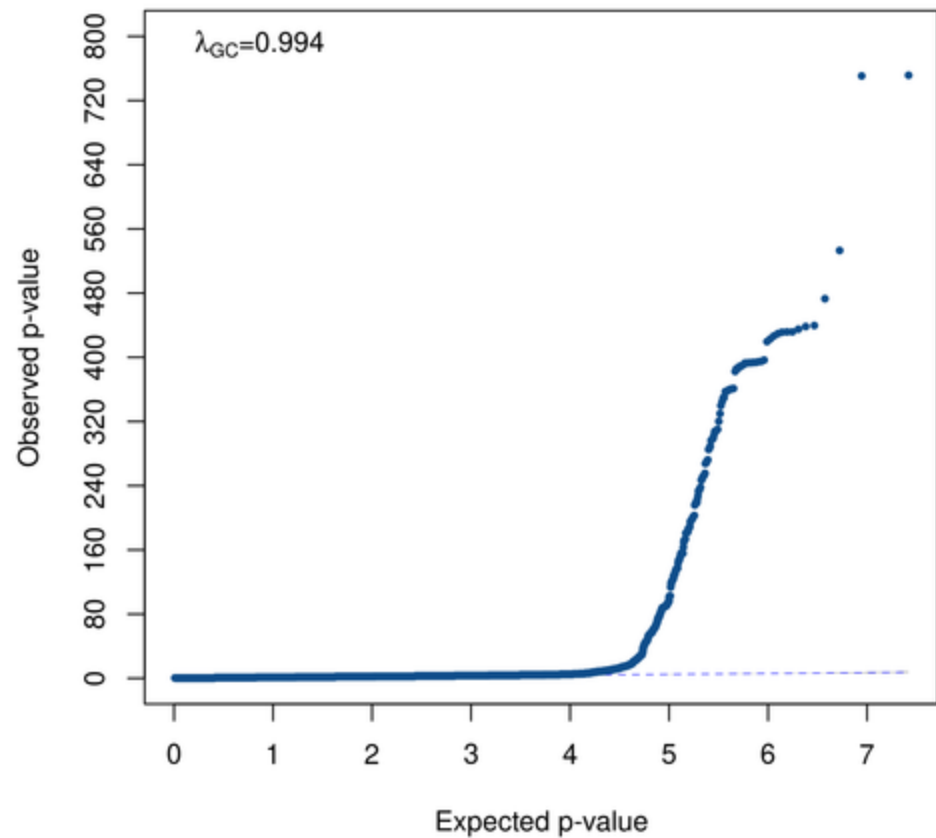

CDCP1 (CDCP1)

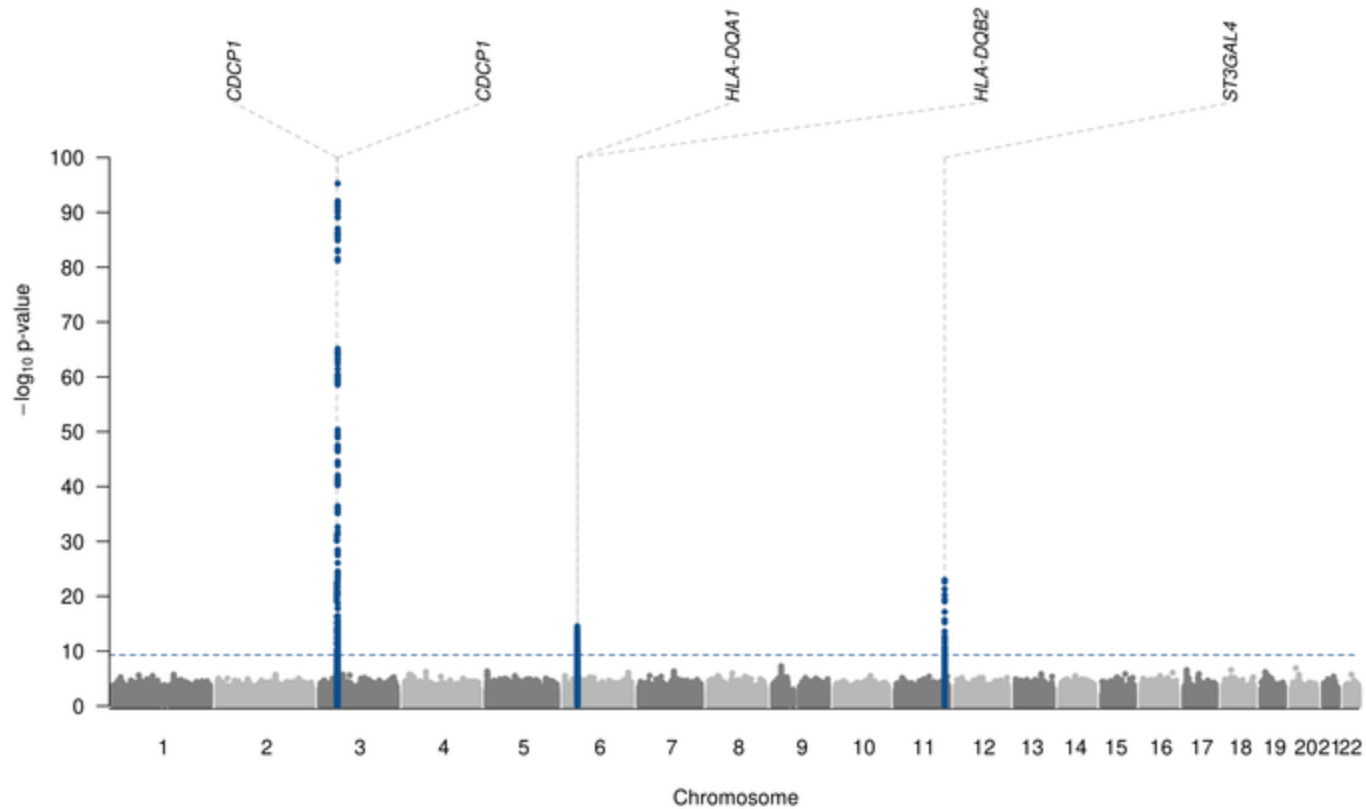

CDCP1 (CDCP1)

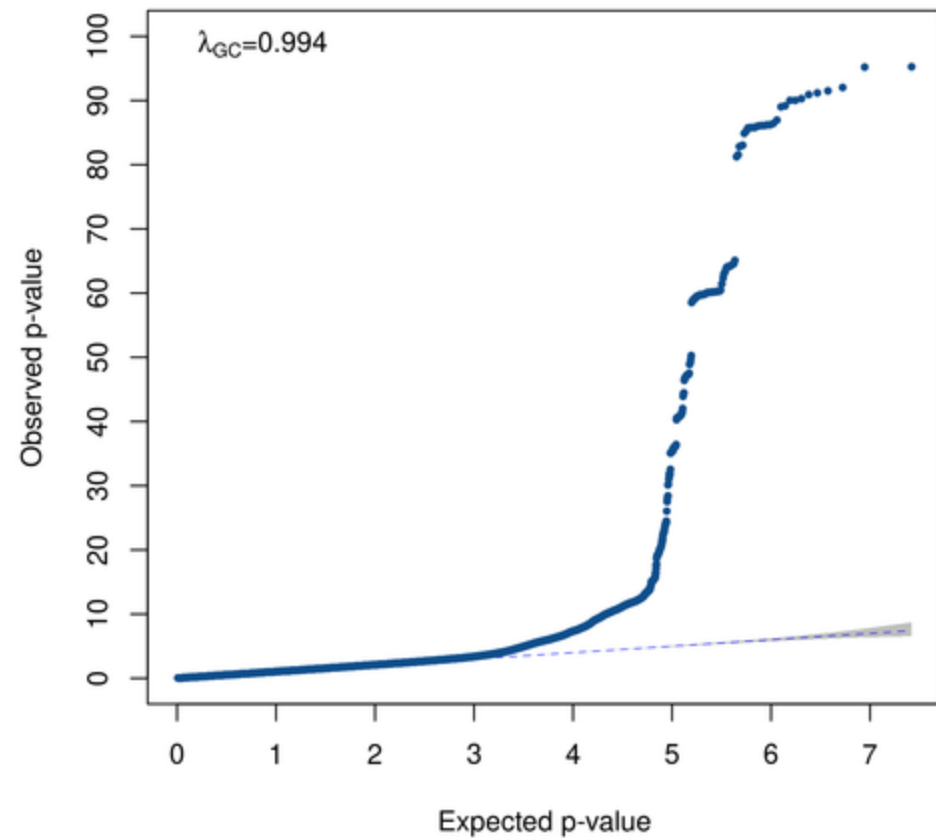

CSF-1 (CSF1)

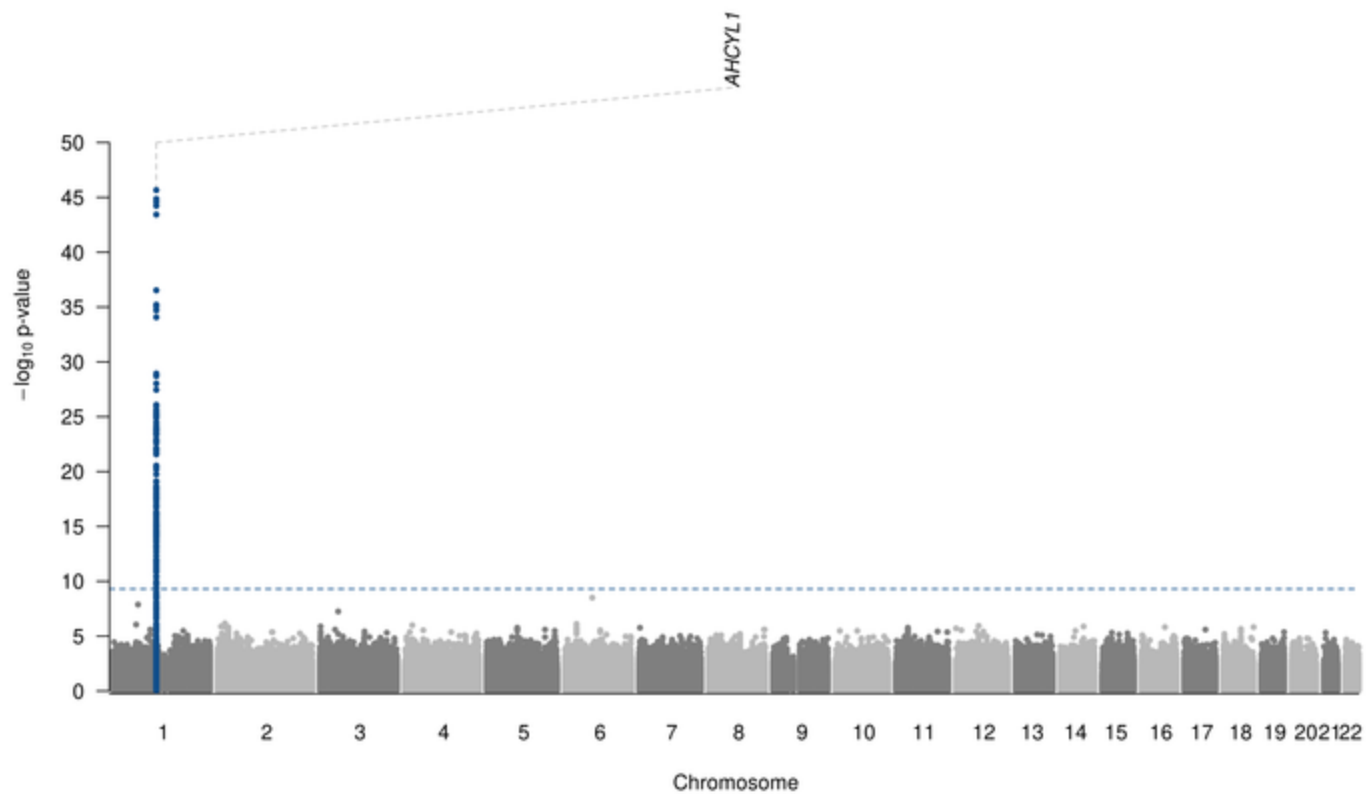

CSF-1 (CSF1)

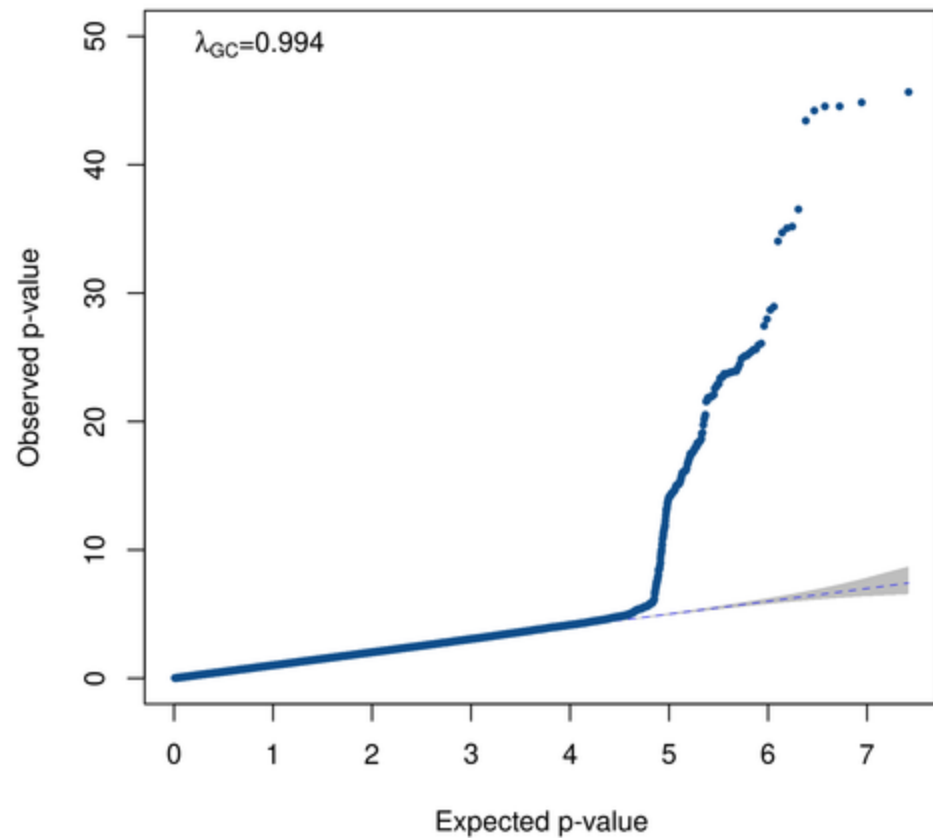

CST5 (CST5)

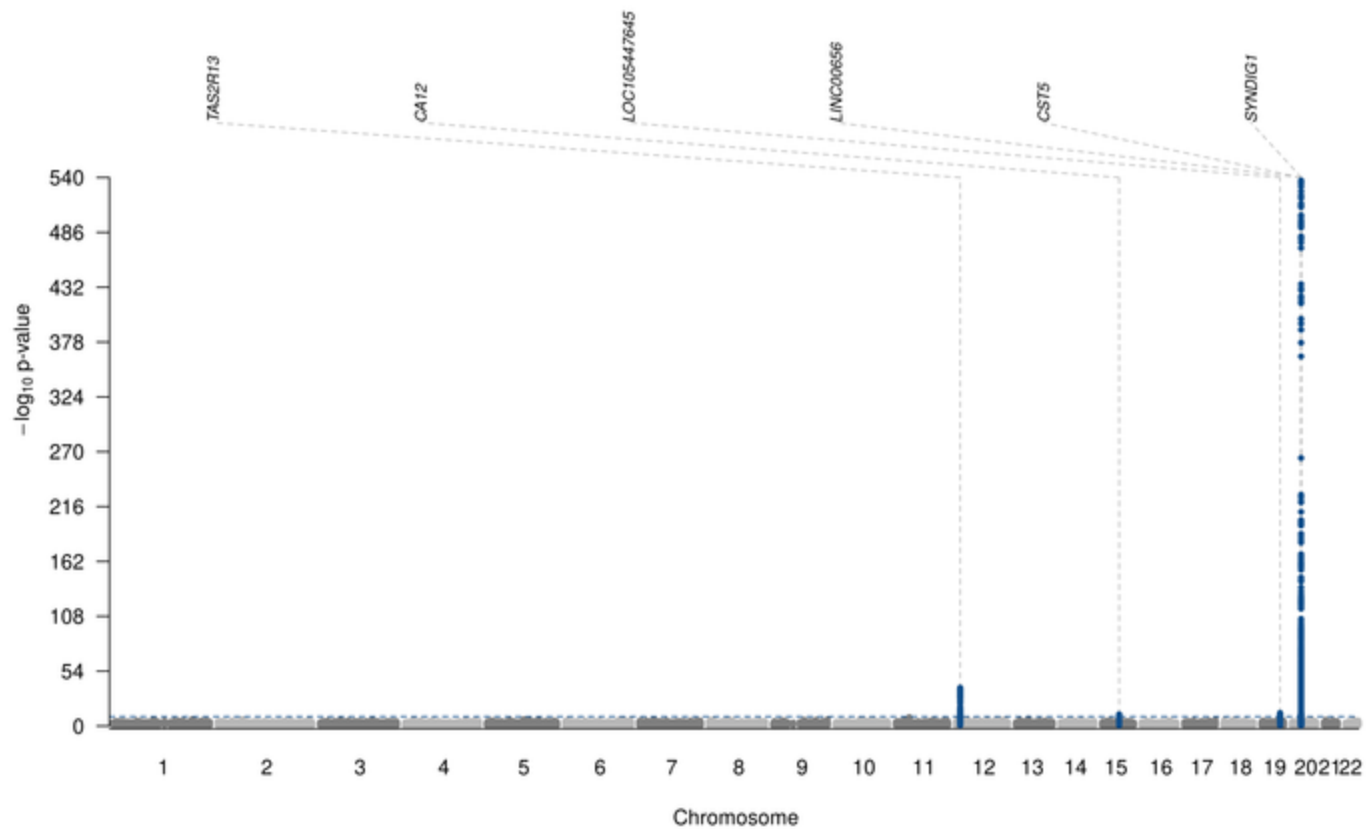

CST5 (CST5)

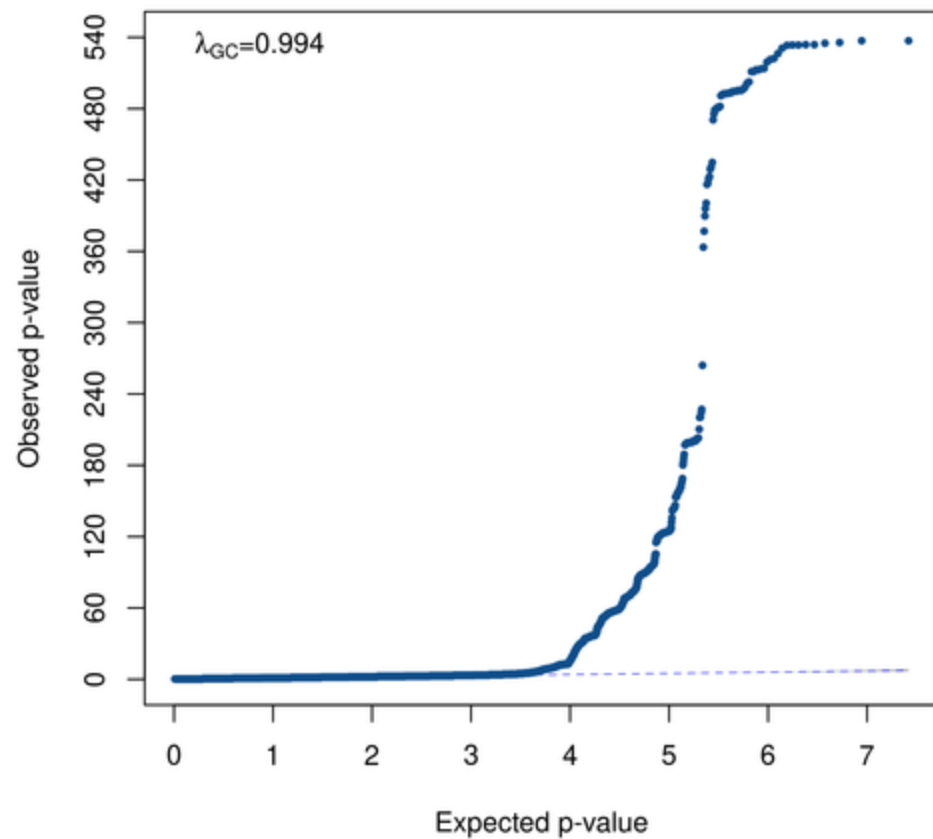

CX3CL1 (CX3CL1)

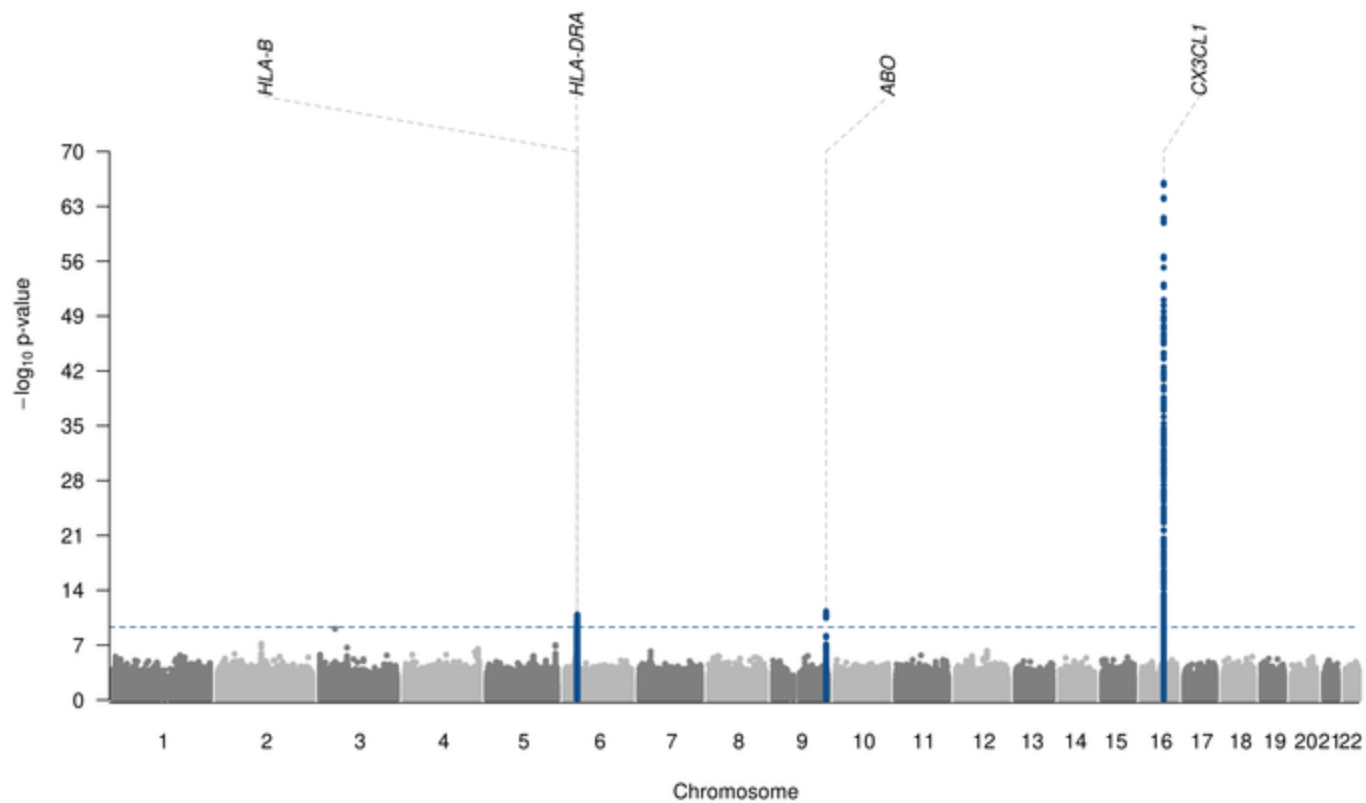

CX3CL1 (CX3CL1)

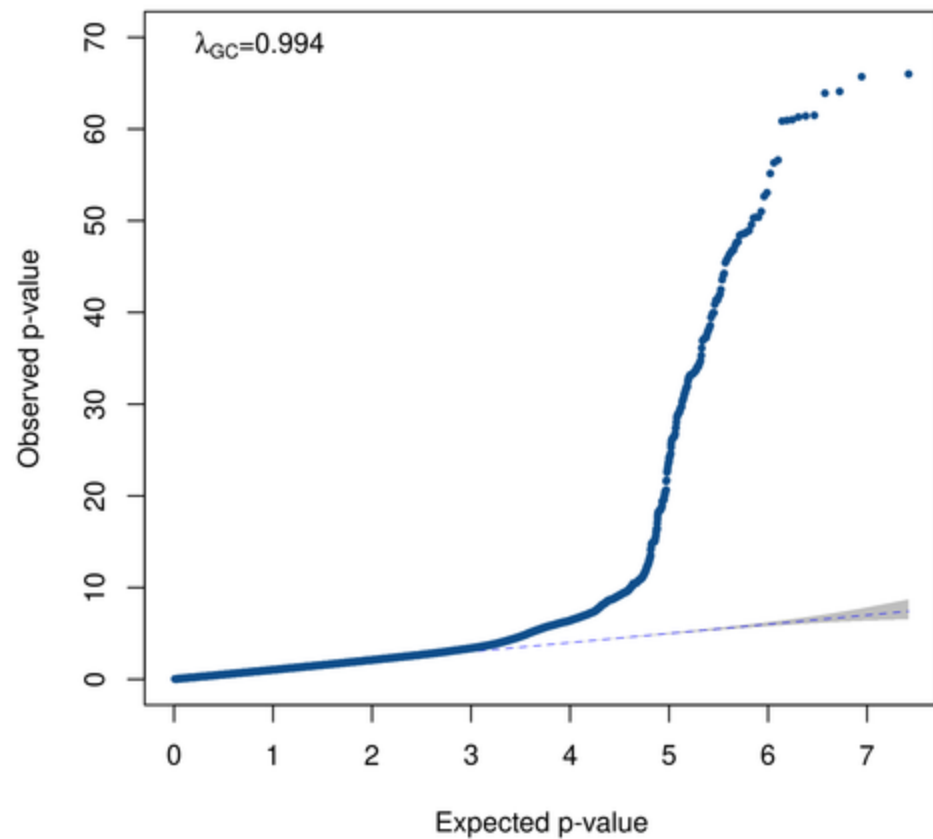

CXCL10 (CXCL10)

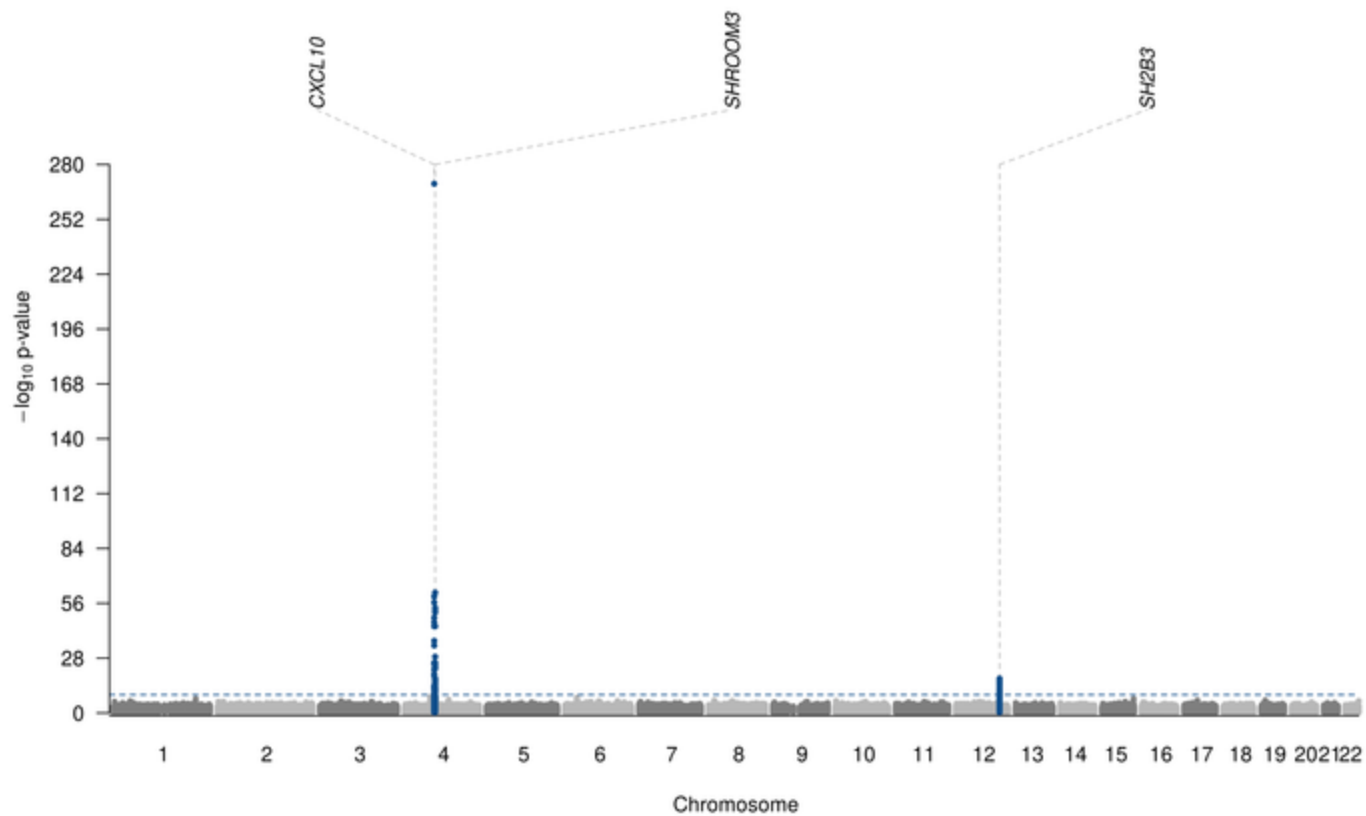

CXCL10 (CXCL10)

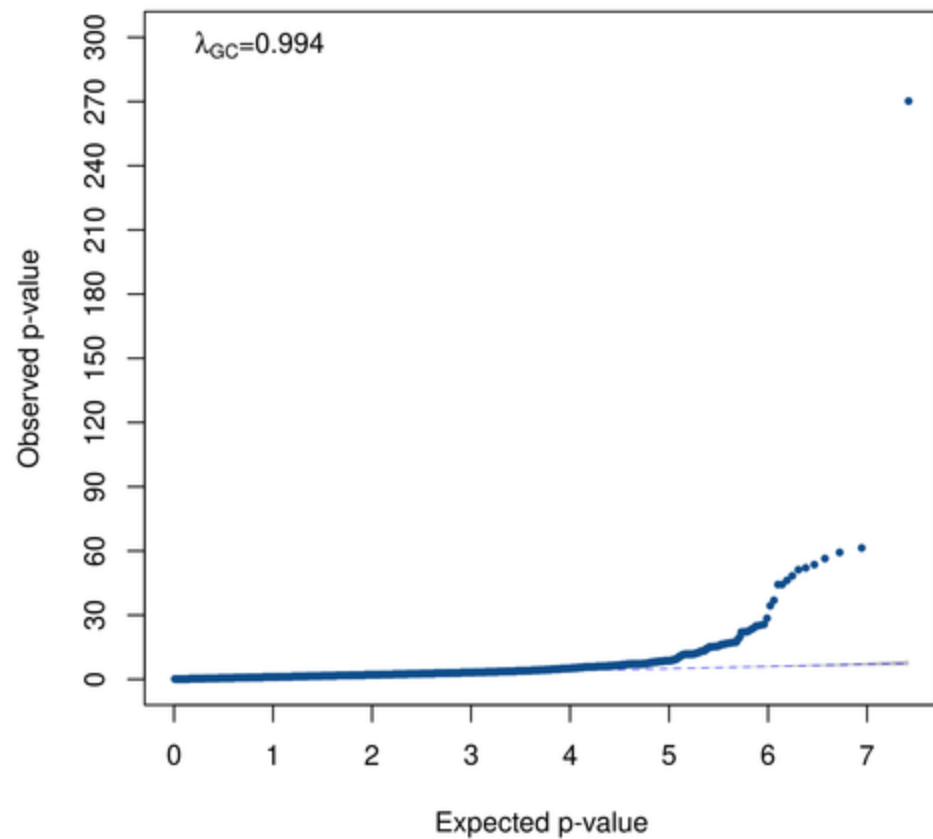

CXCL11 (CXCL11)

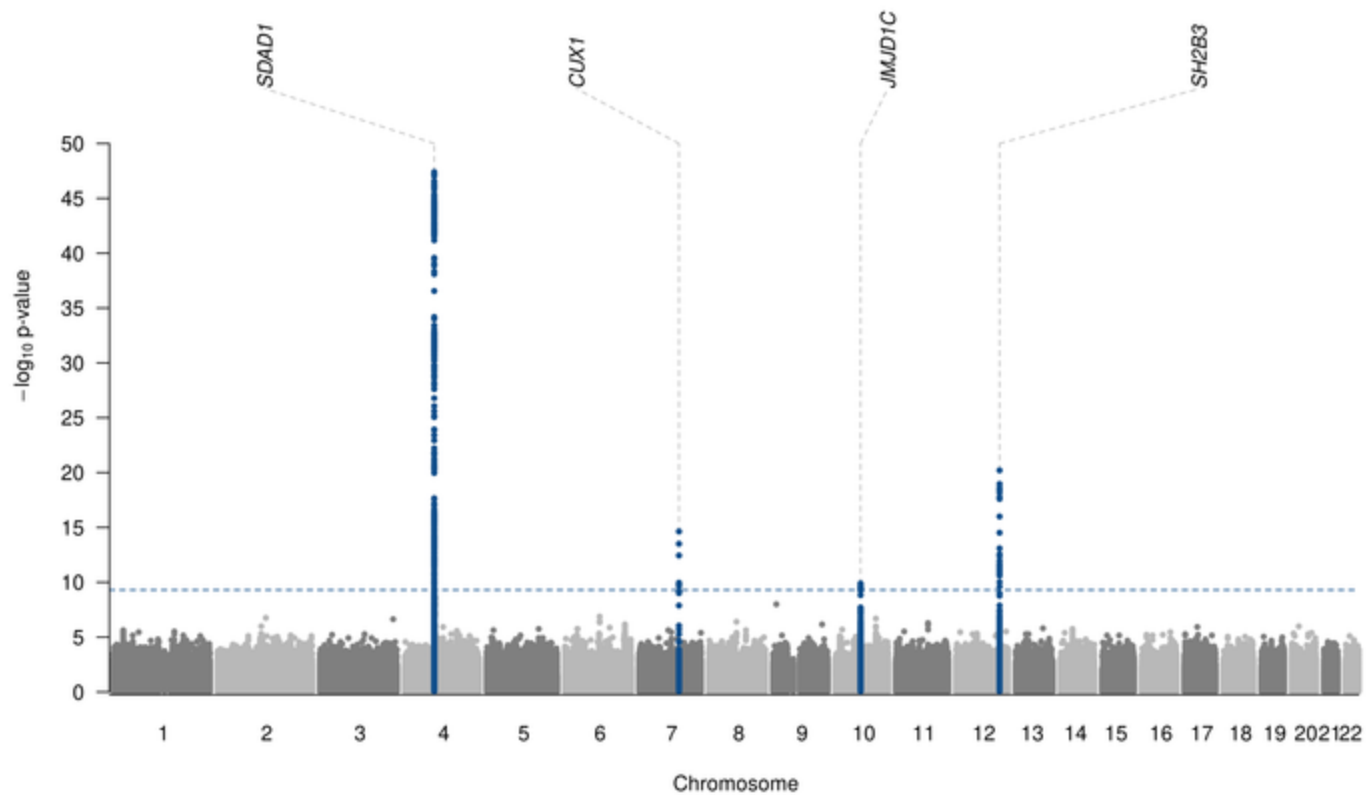

CXCL11 (CXCL11)

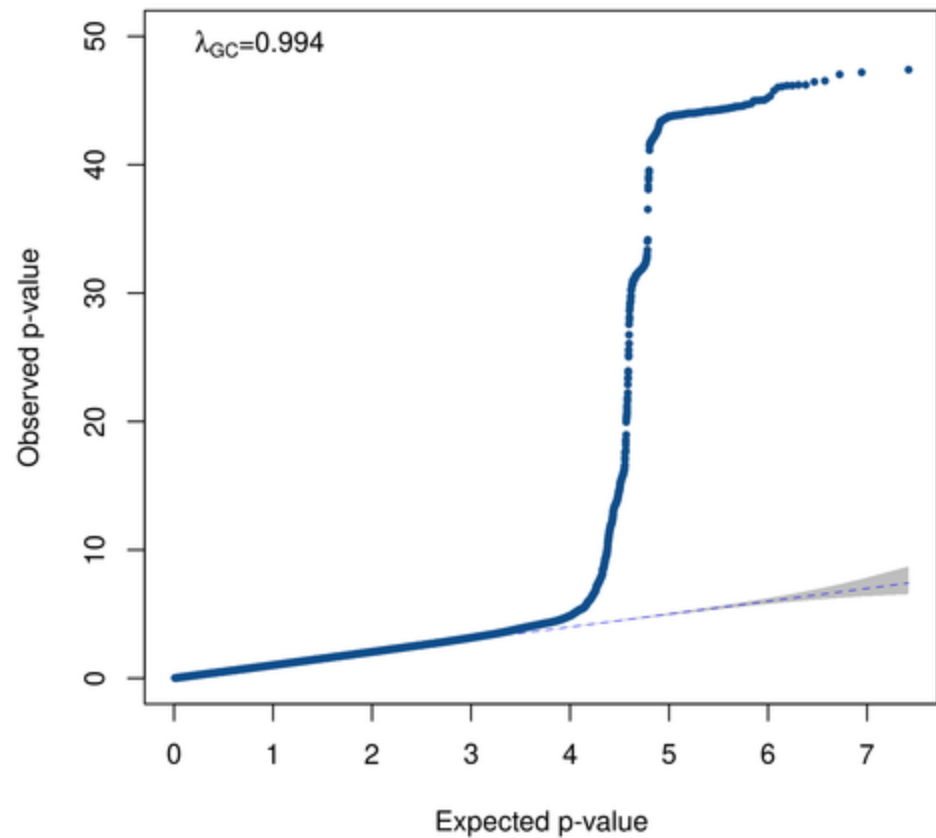

CXCL1 (CXCL1)

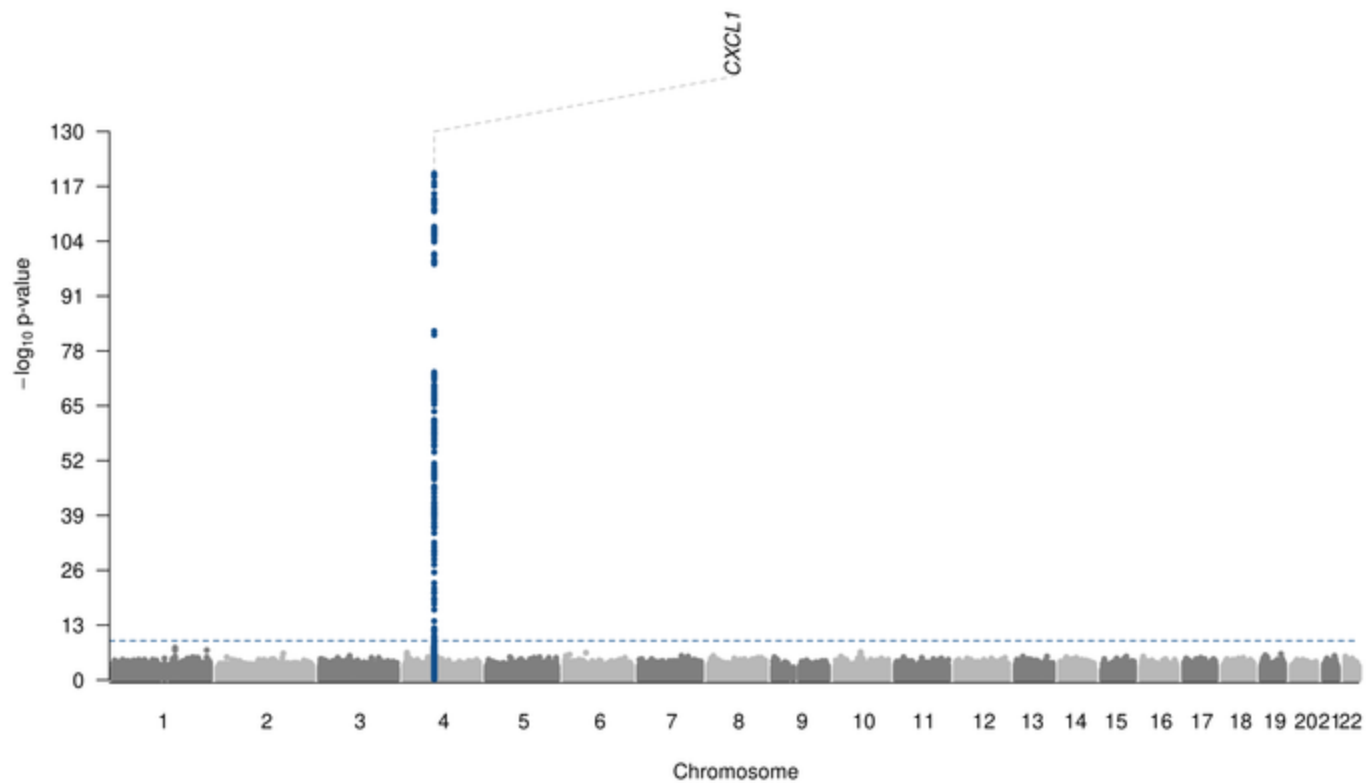

CXCL1 (CXCL1)

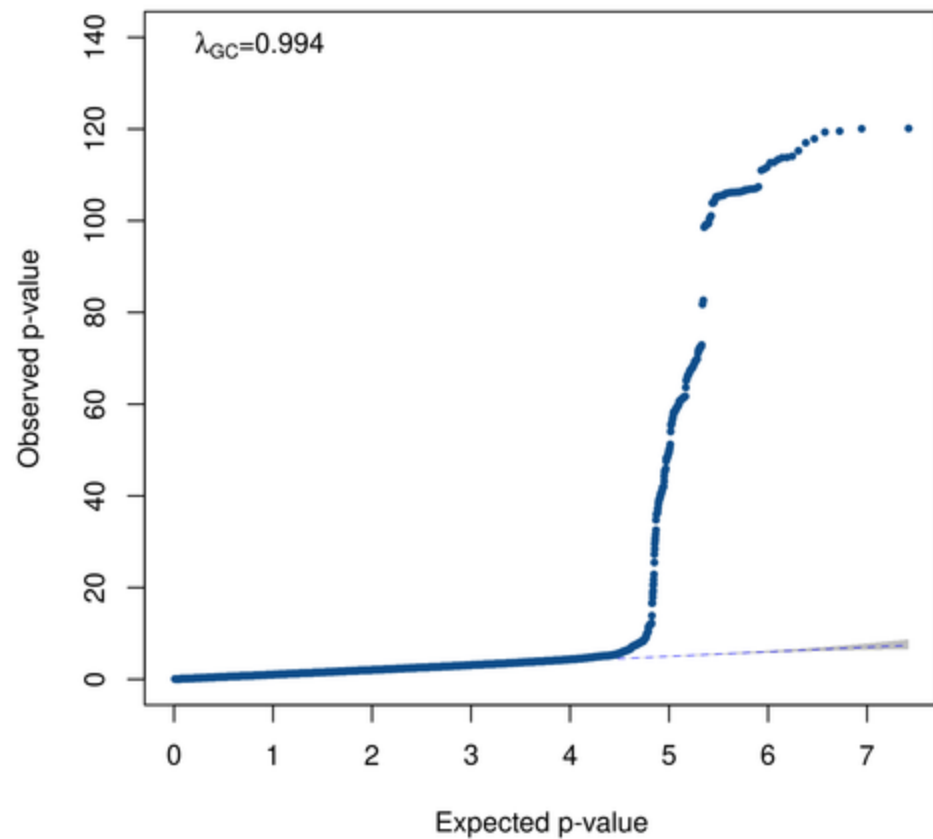



CXCL5 (CXCL5)

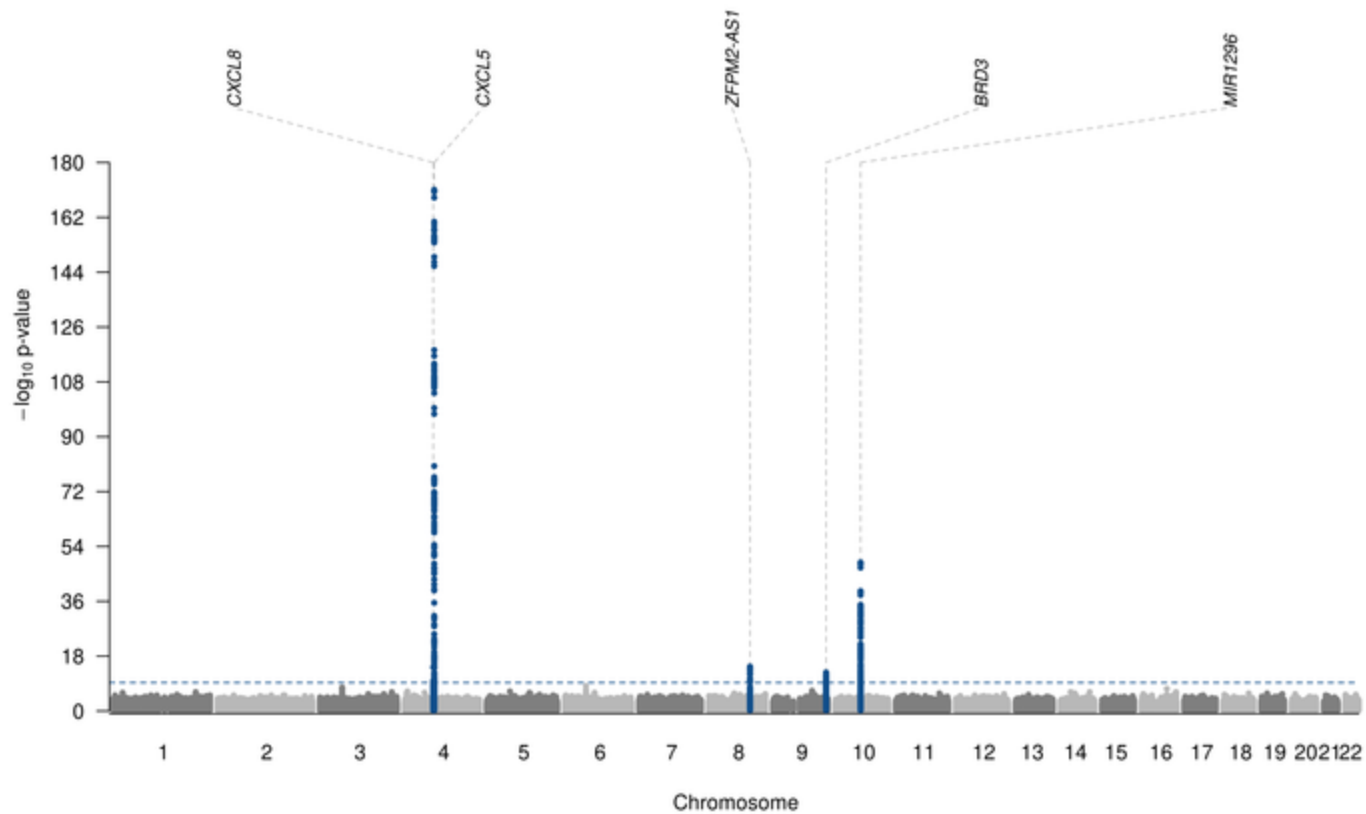

CXCL5 (CXCL5)

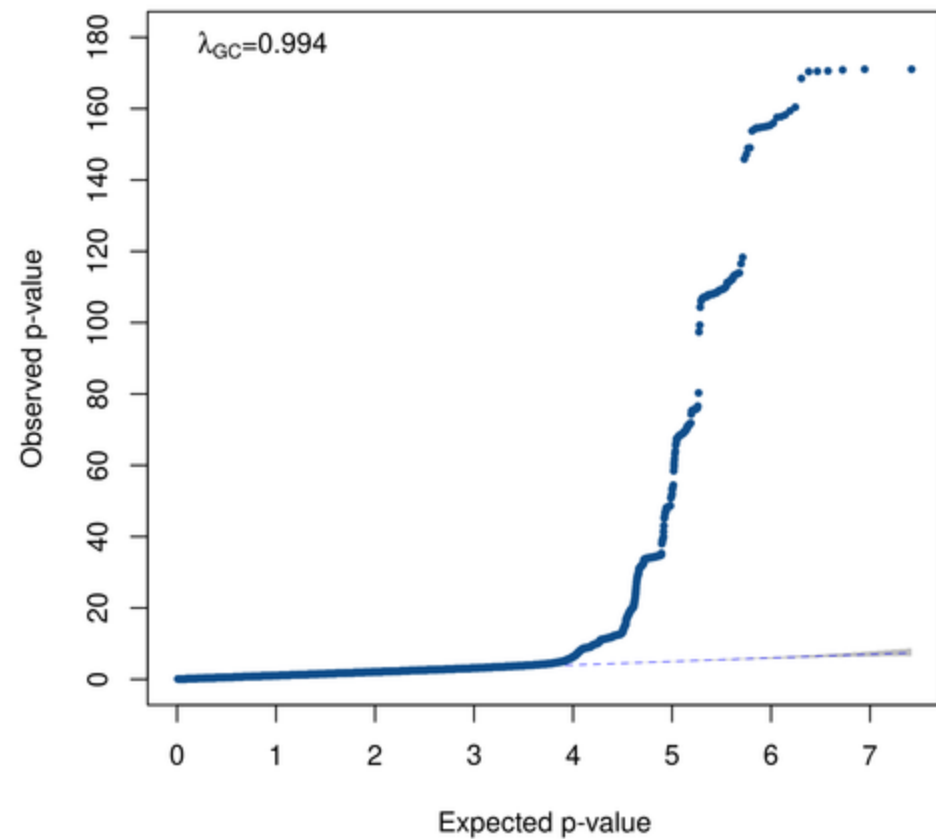

CXCL6 (CXCL6)

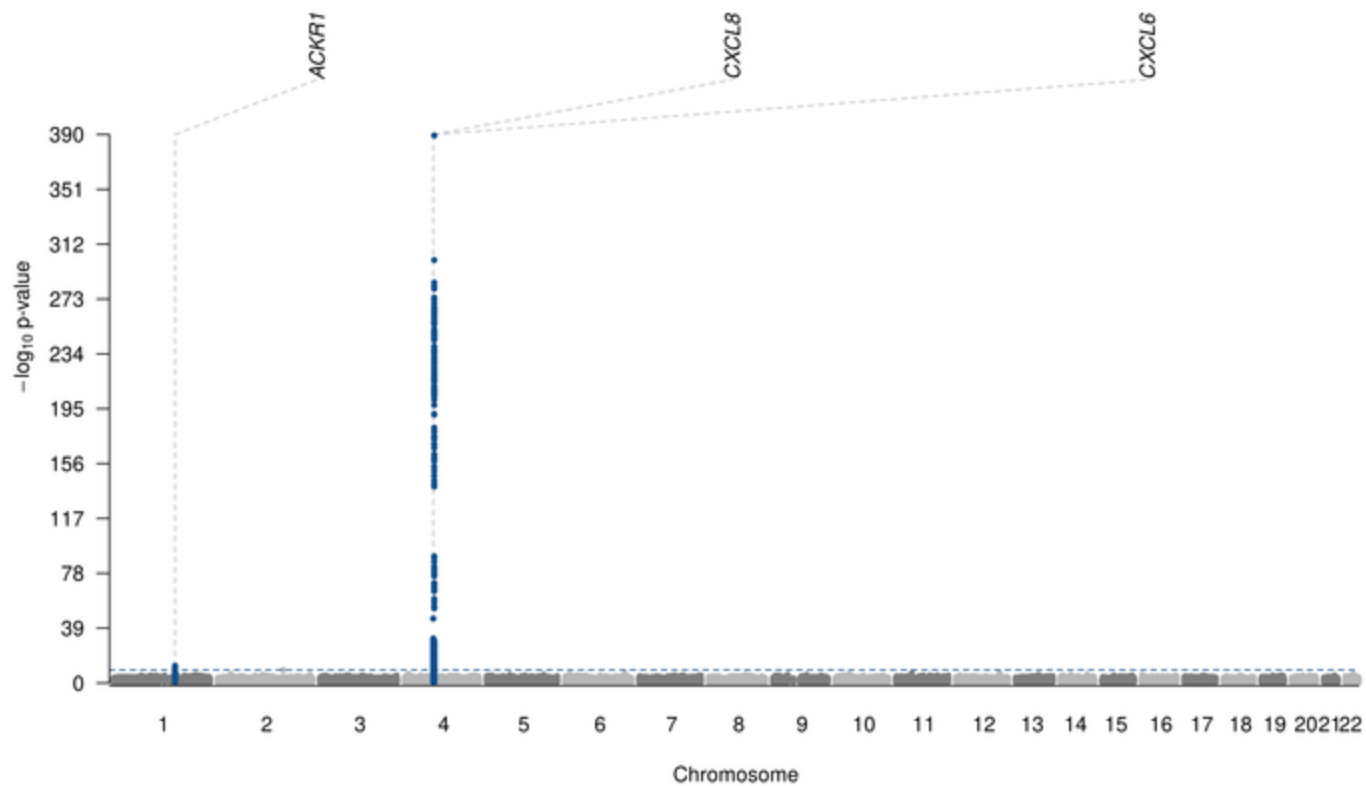

CXCL6 (CXCL6)

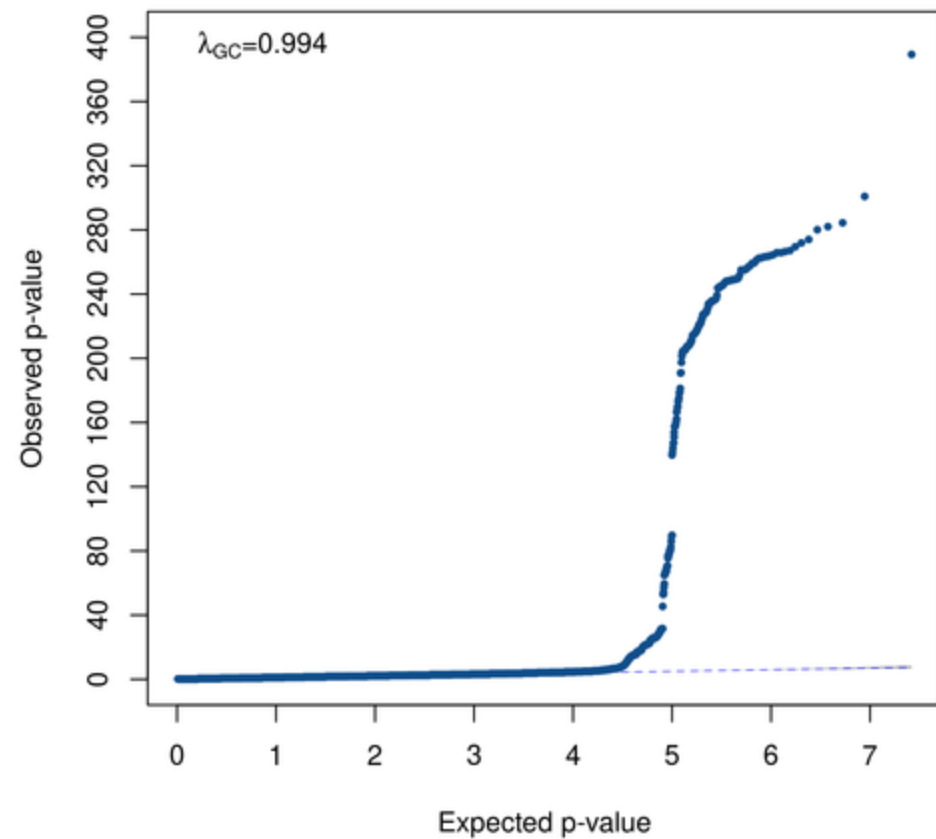

CXCL9 (CXCL9)

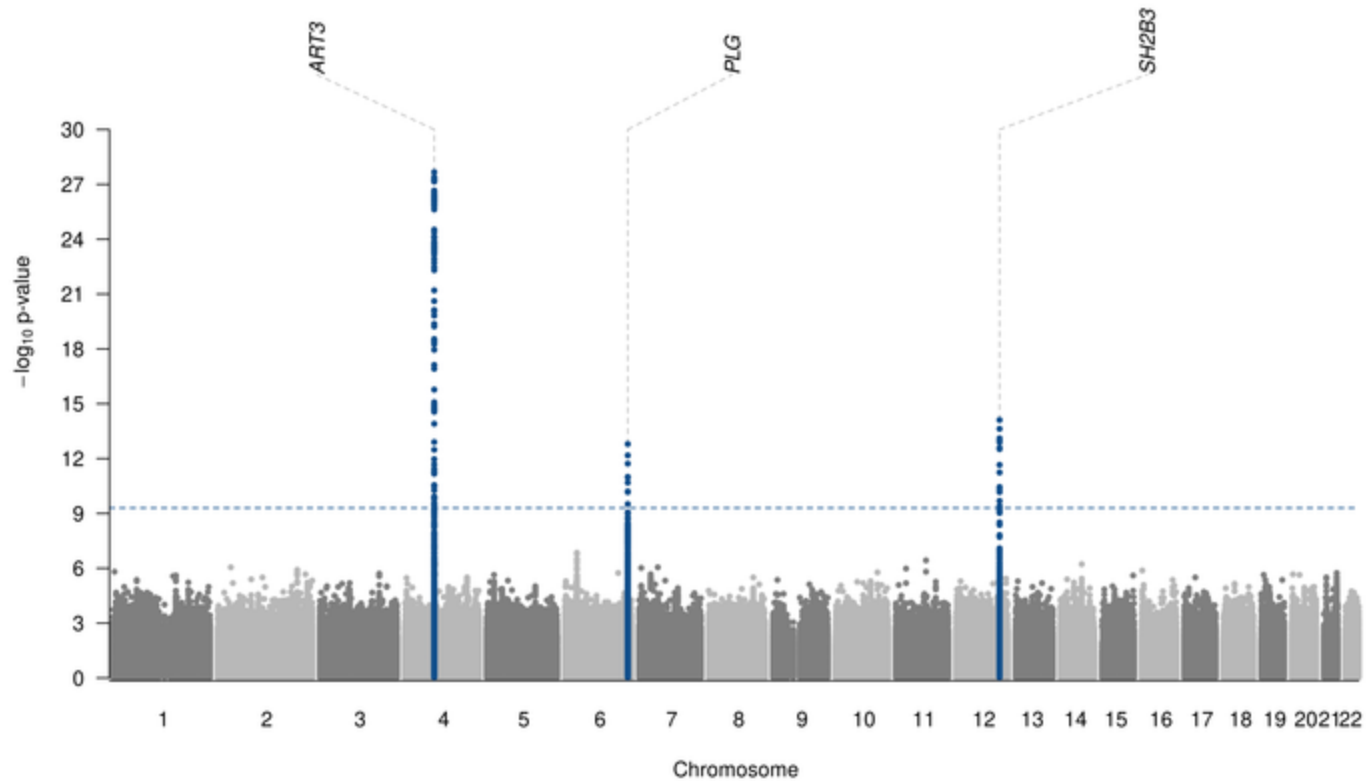

CXCL9 (CXCL9)

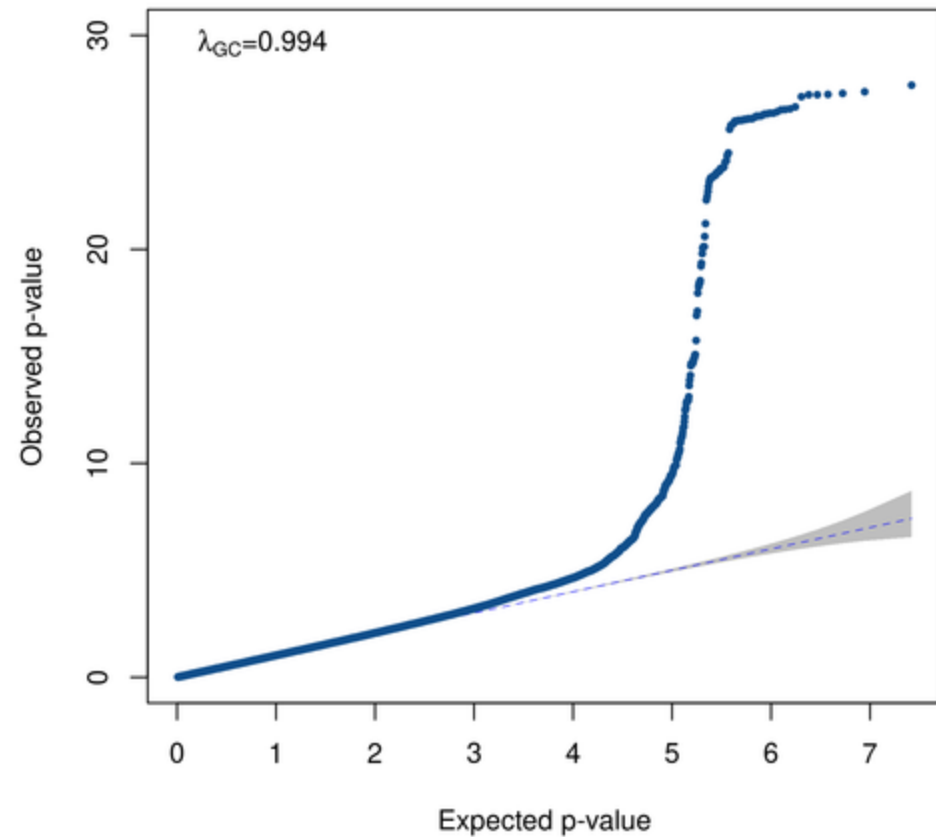

DNER (DNER)

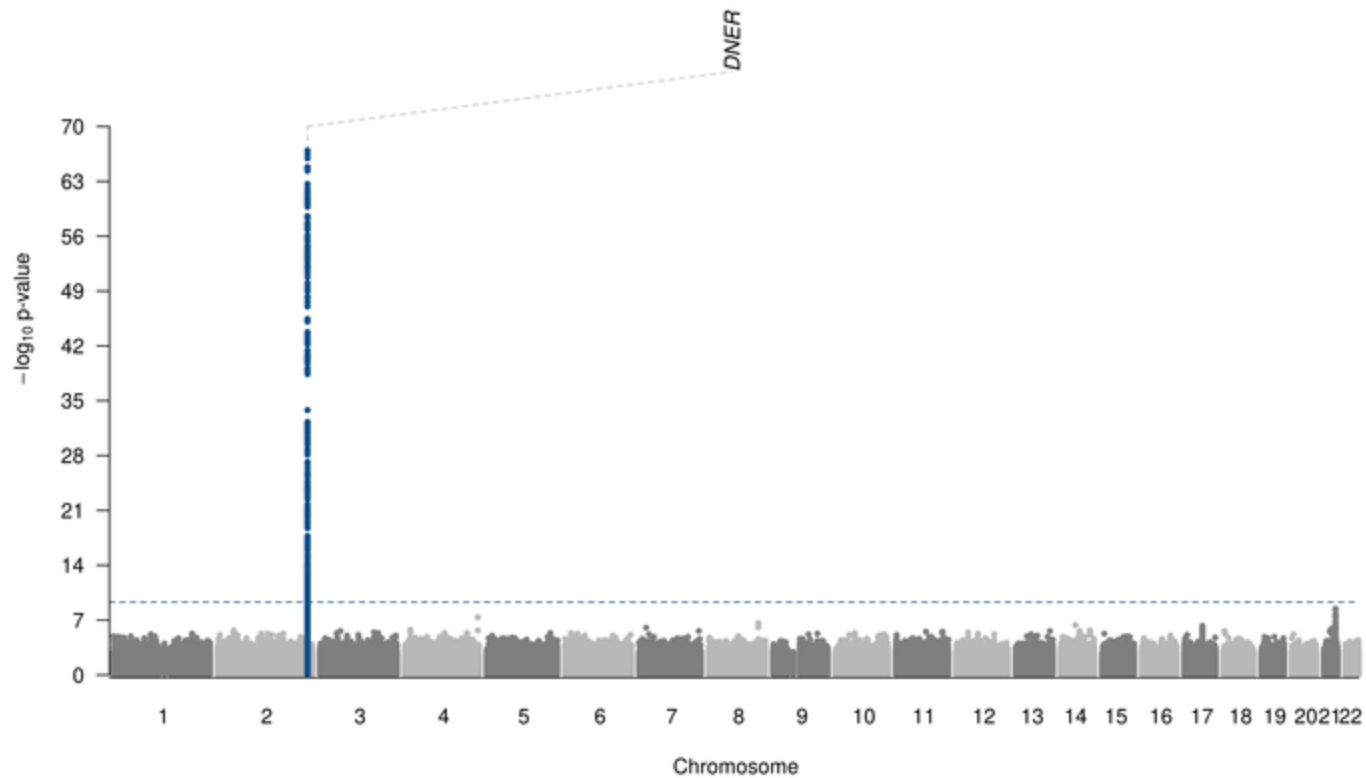

DNER (DNER)

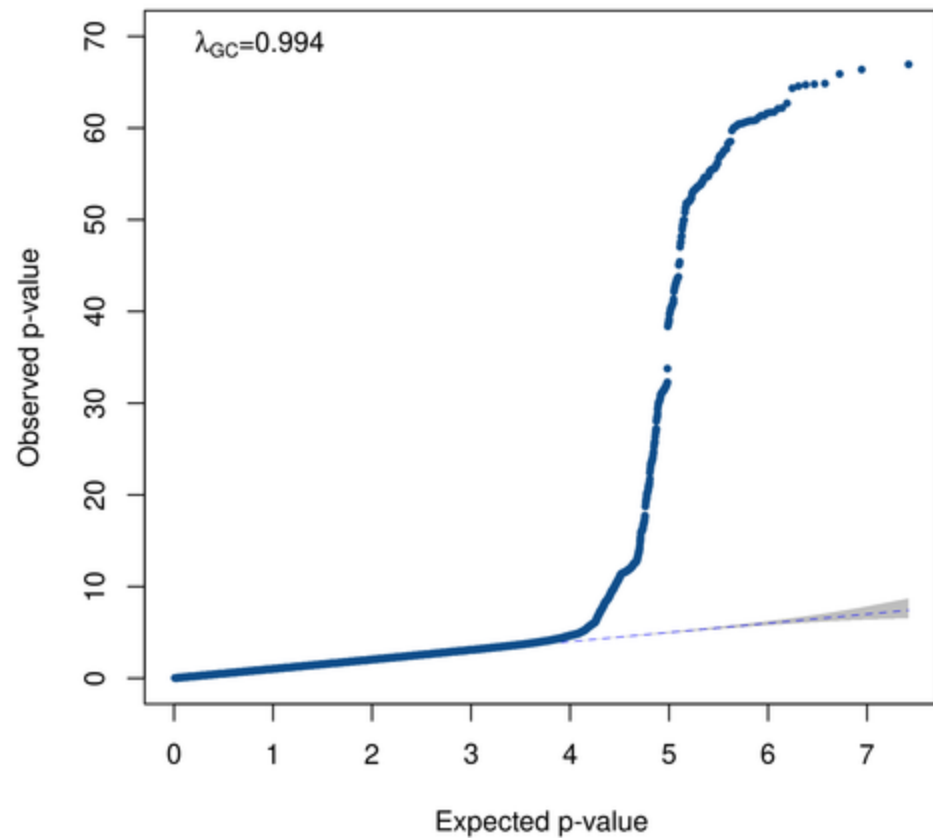

EN-RAGE (S100A12)

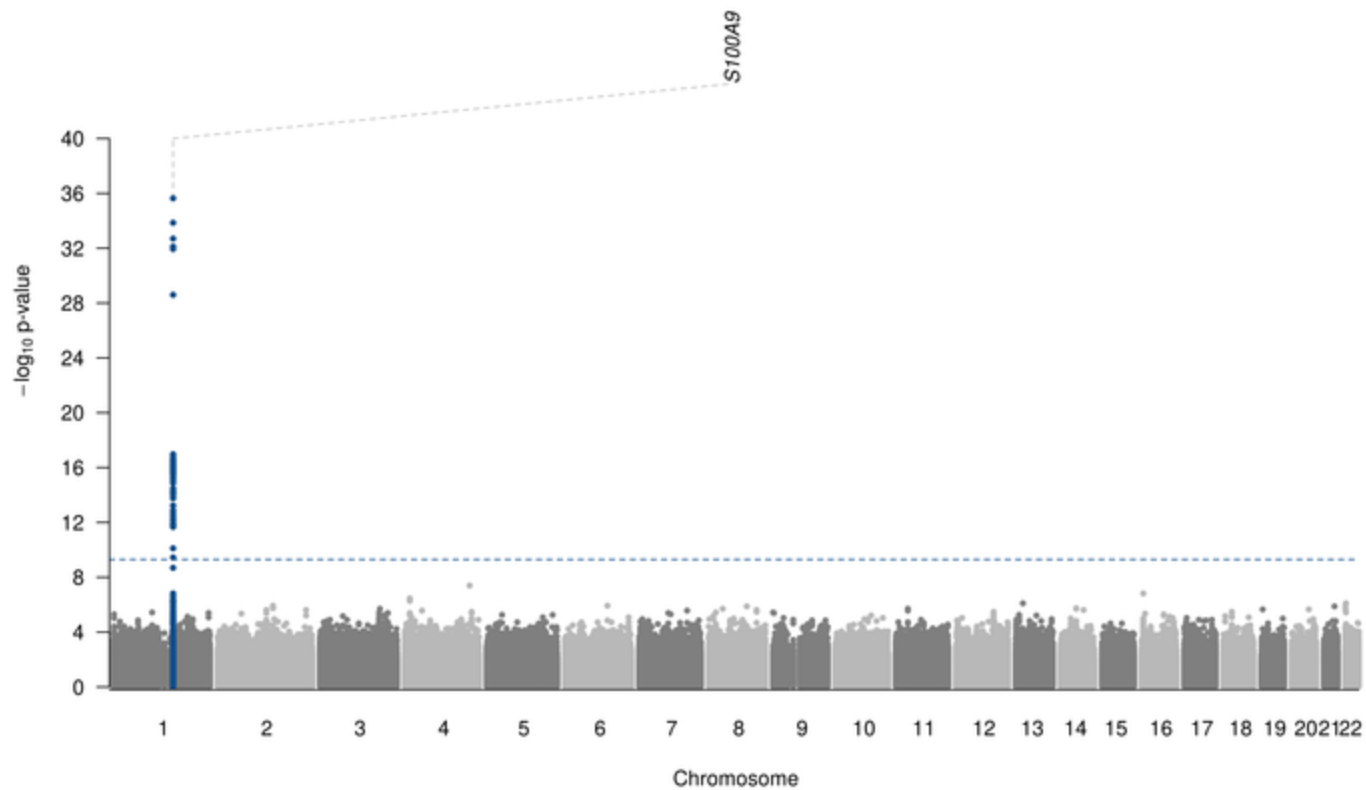

EN-RAGE (S100A12)

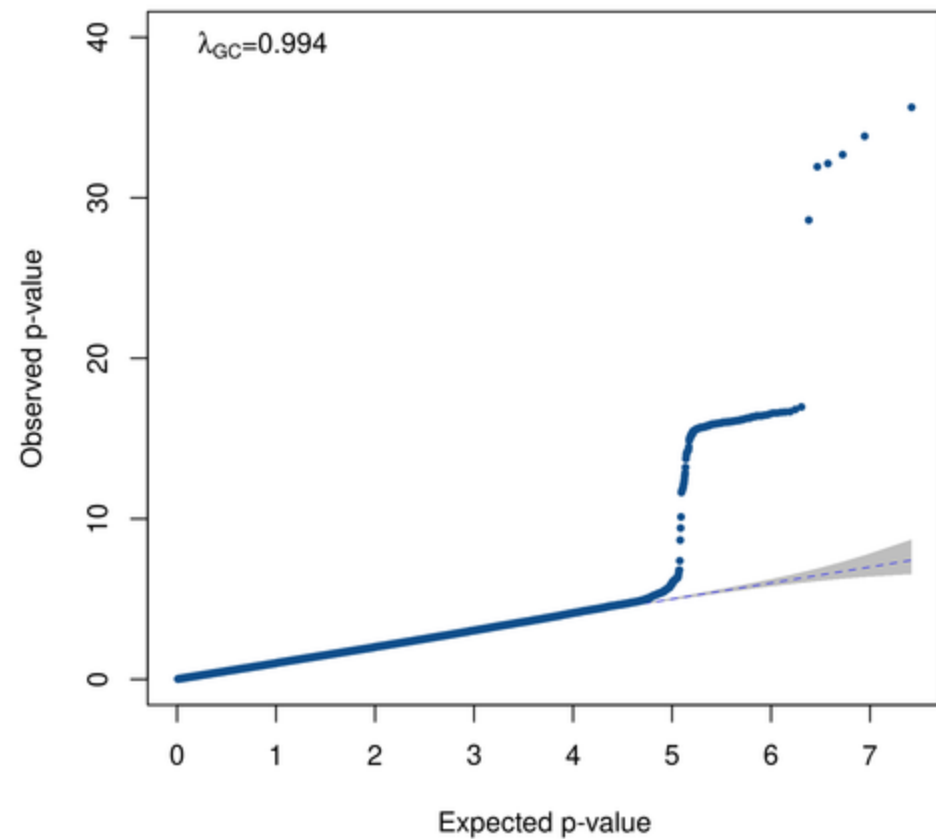

FGF-19 (FGF19)

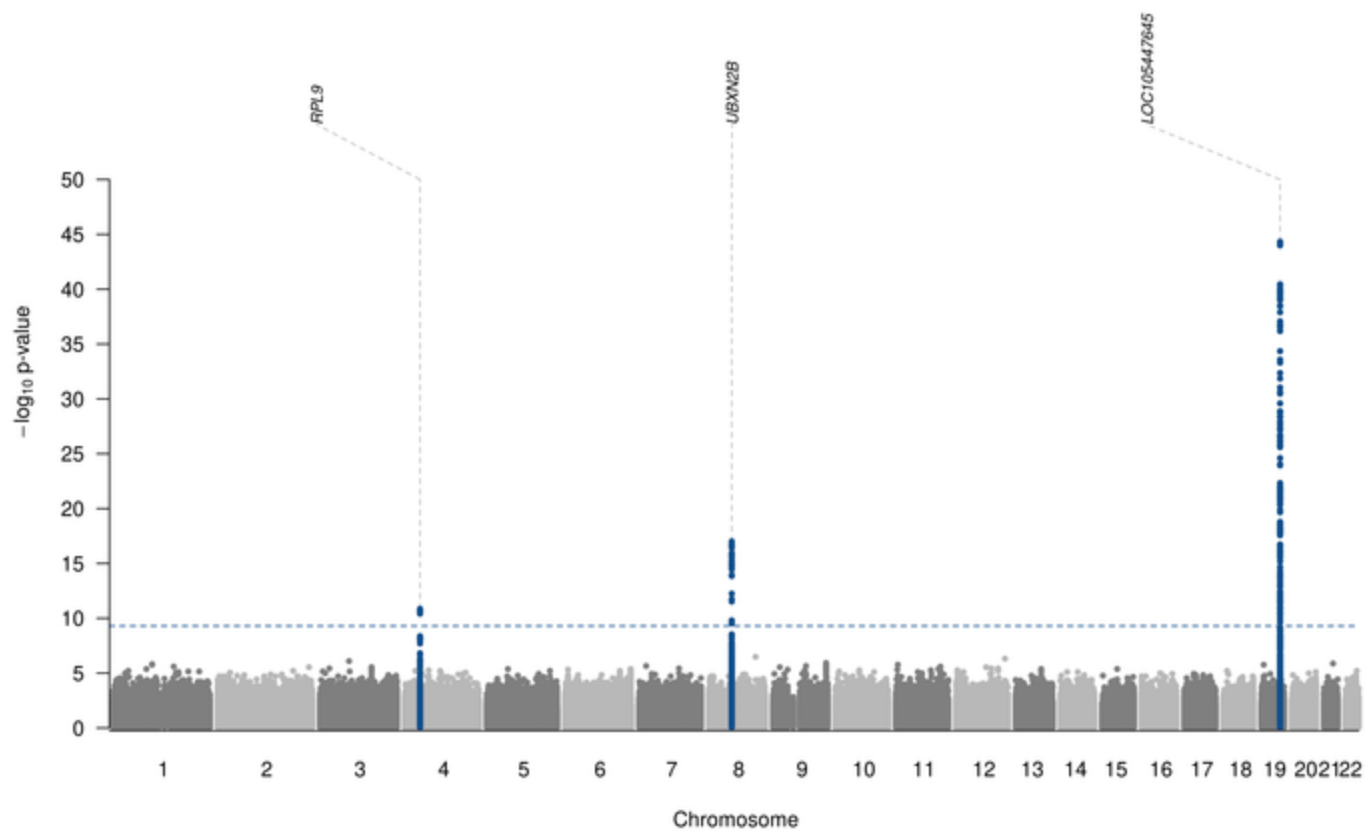

FGF-19 (FGF19)

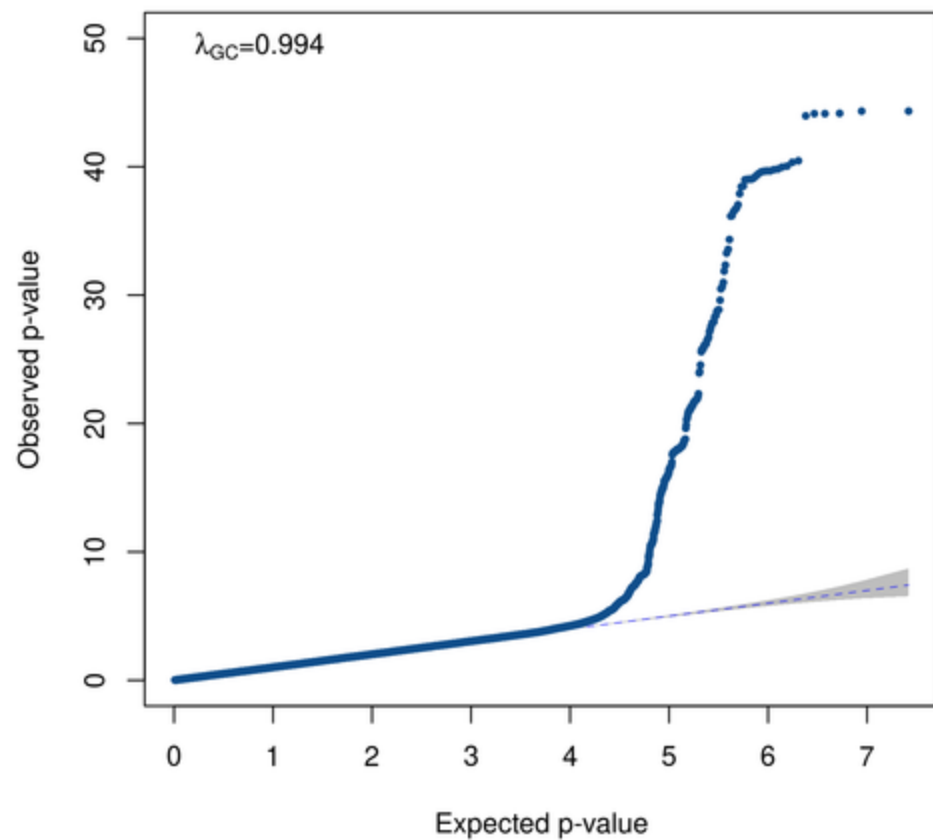

FGF-21 (FGF21)

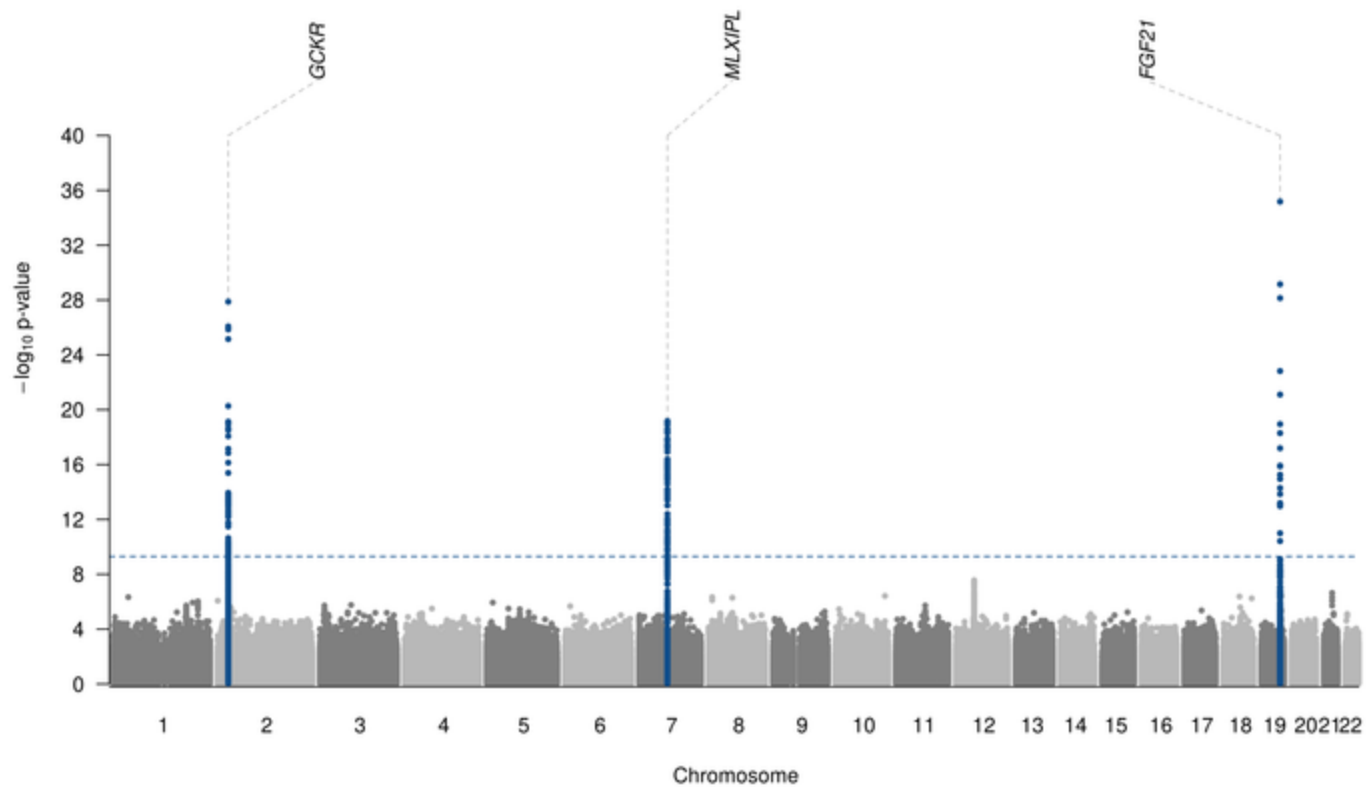

FGF-21 (FGF21)

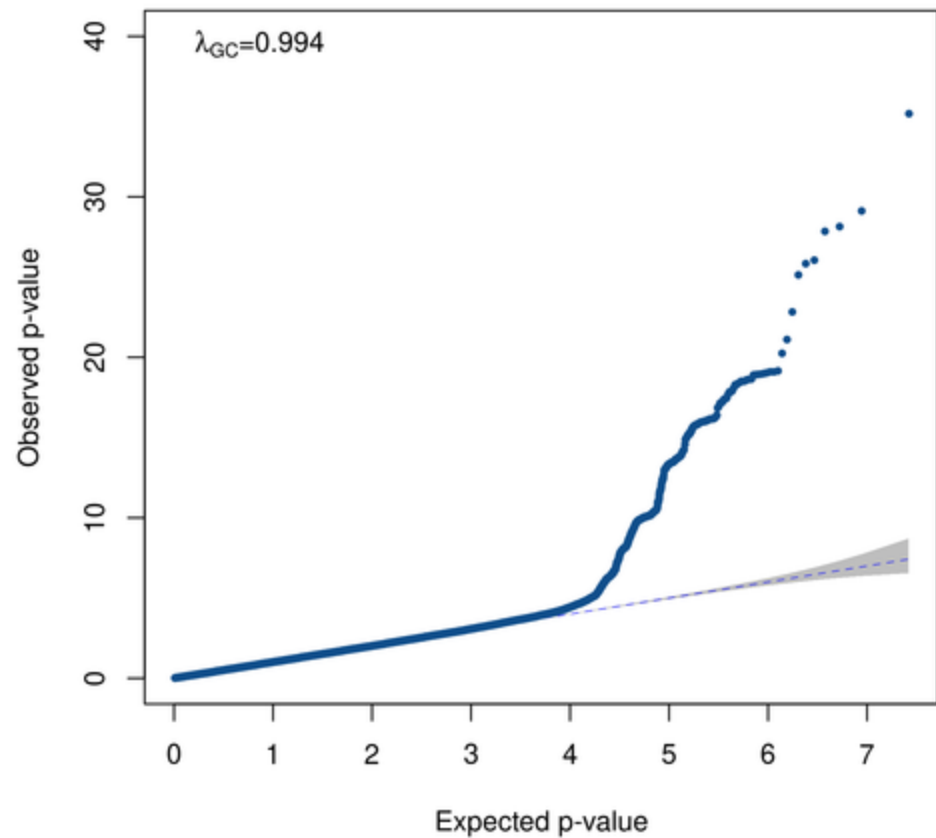

FGF-23 (FGF23)

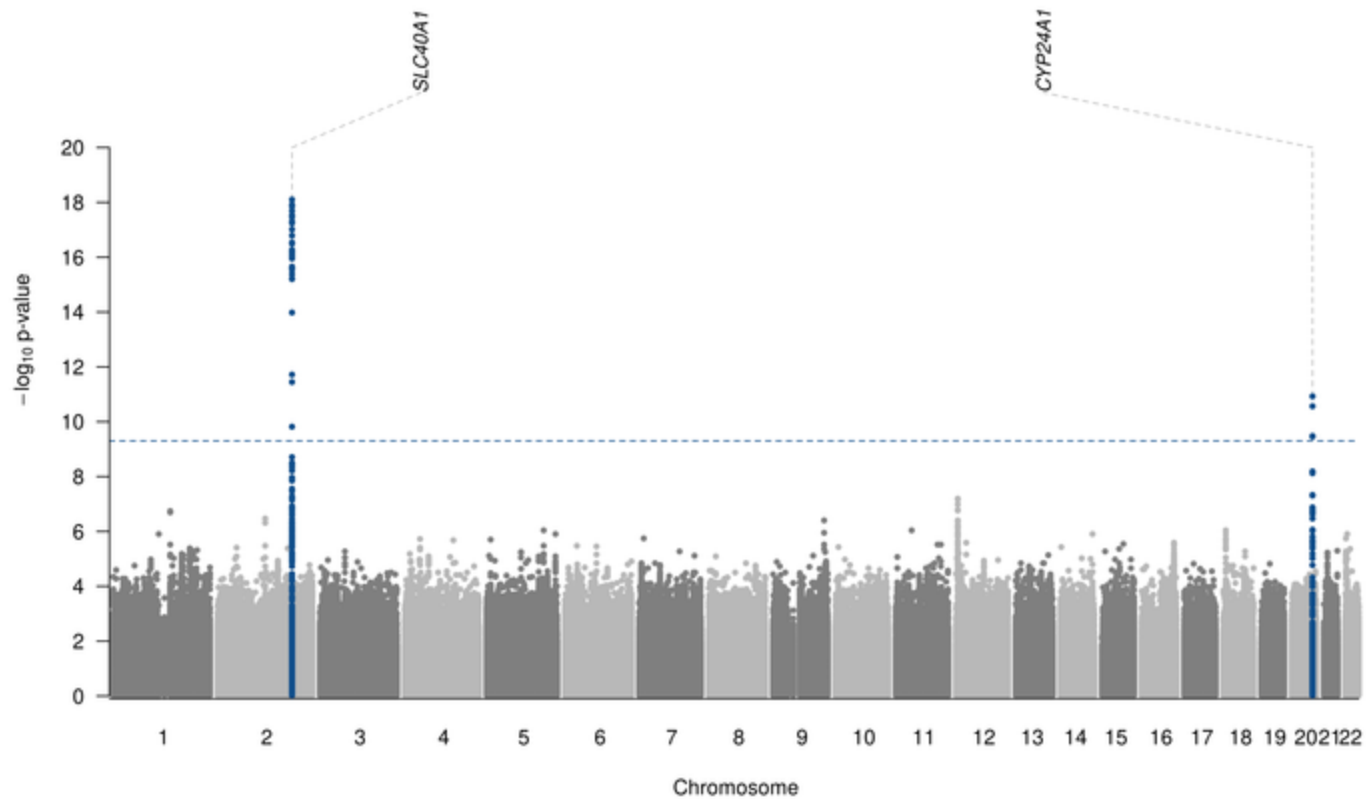

FGF-23 (FGF23)

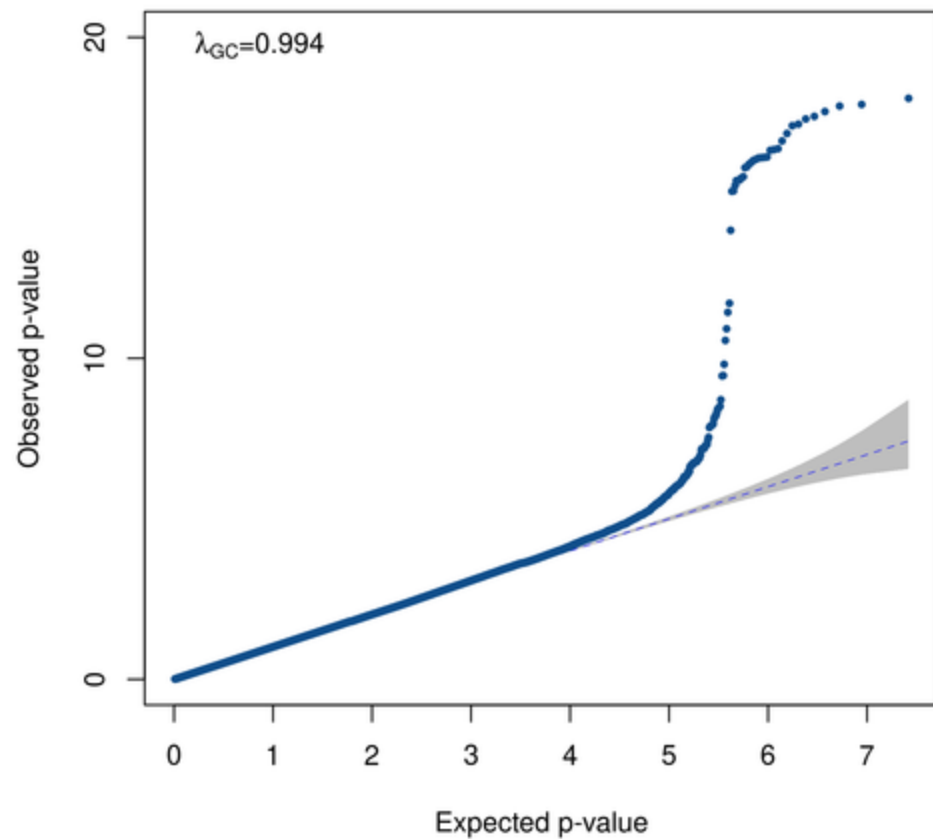



FGF-5 (FGF5)

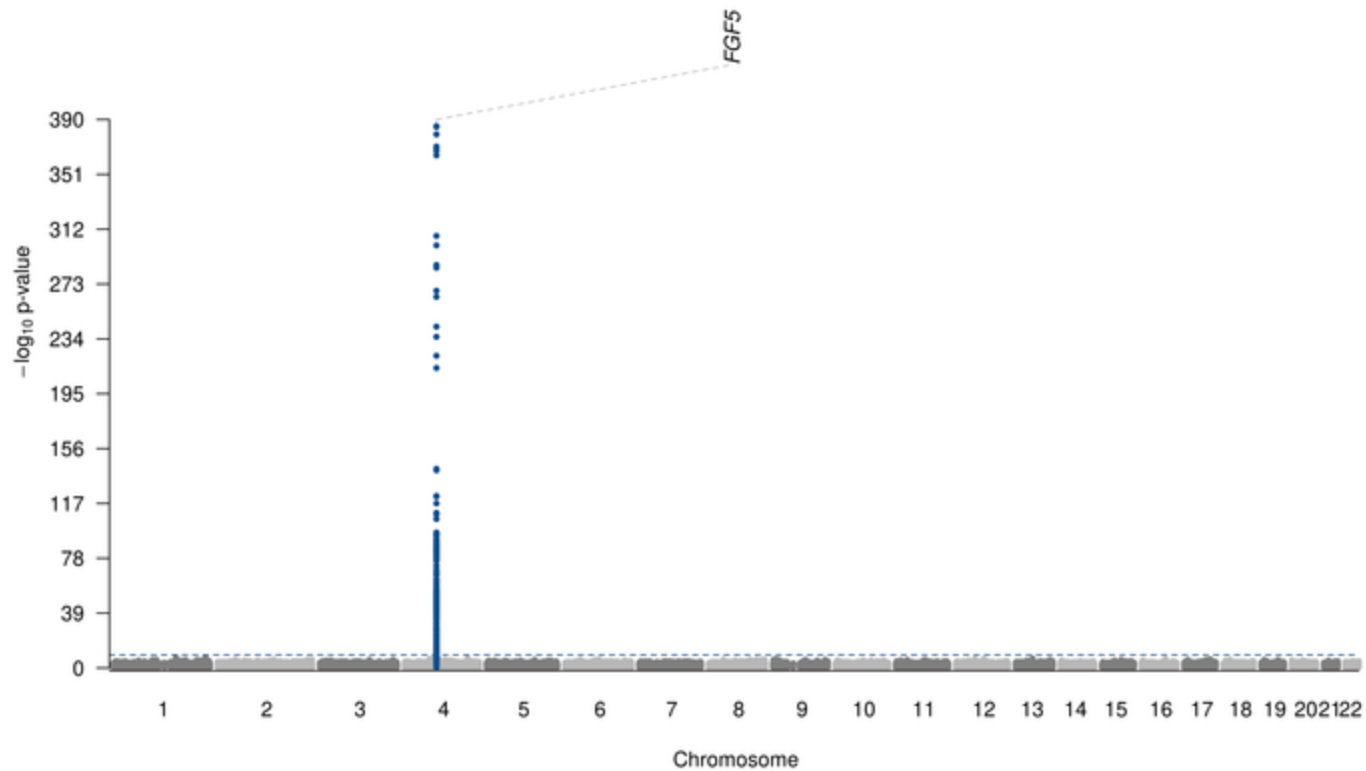

FGF-5 (FGF5)

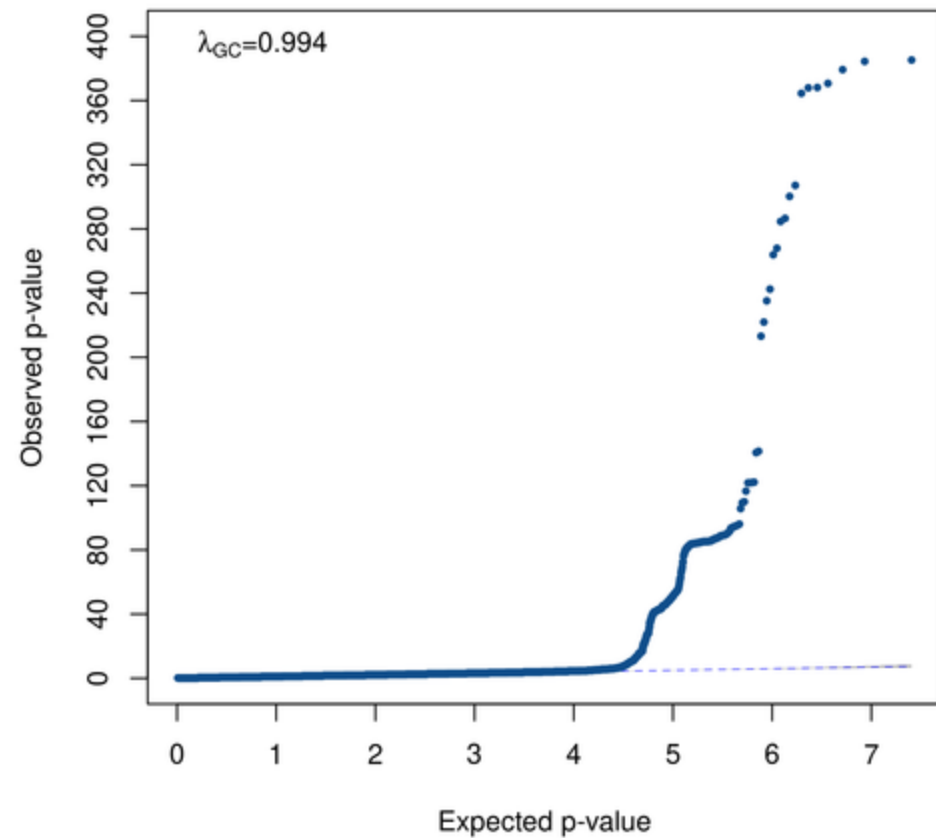

Fit3L (FLT3LG)

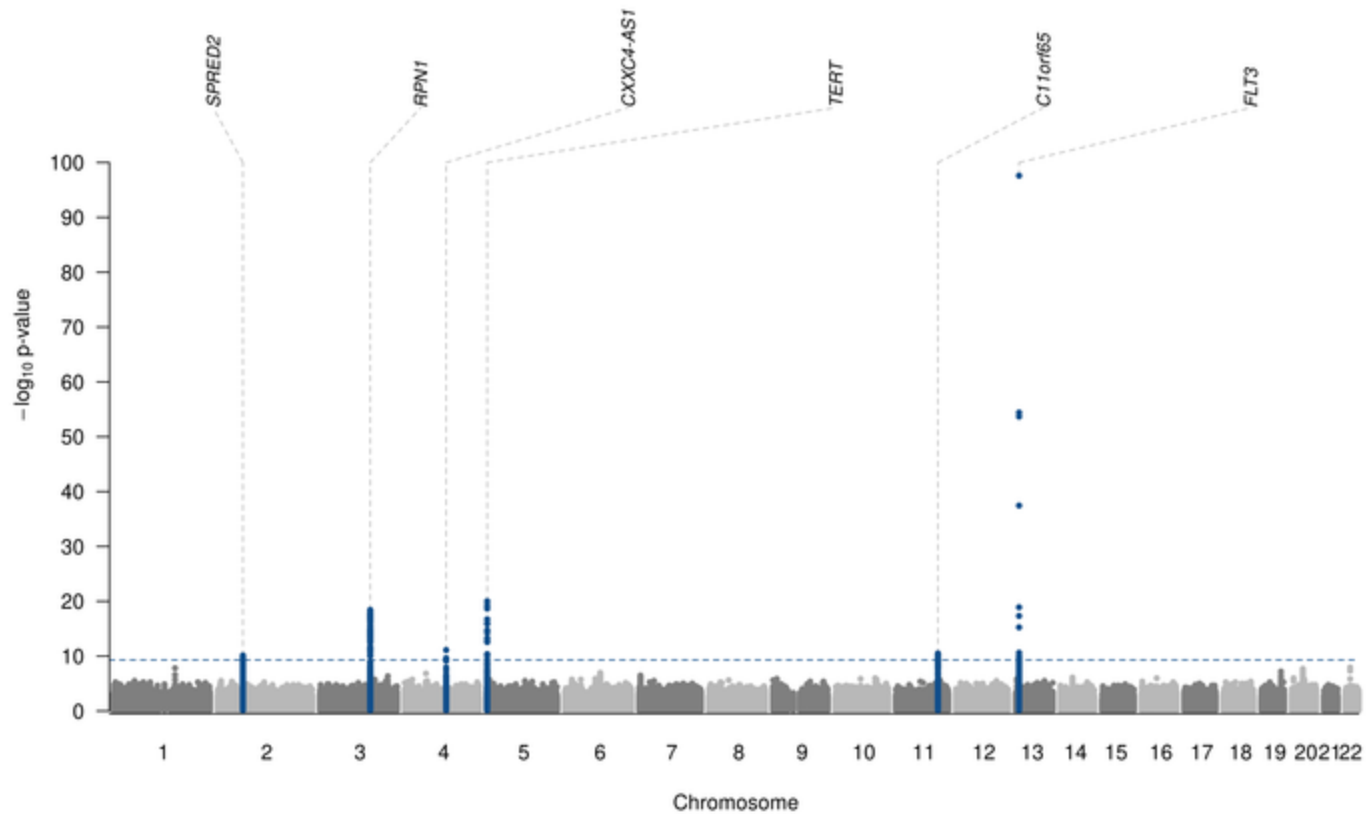

Fit3L (FLT3LG)

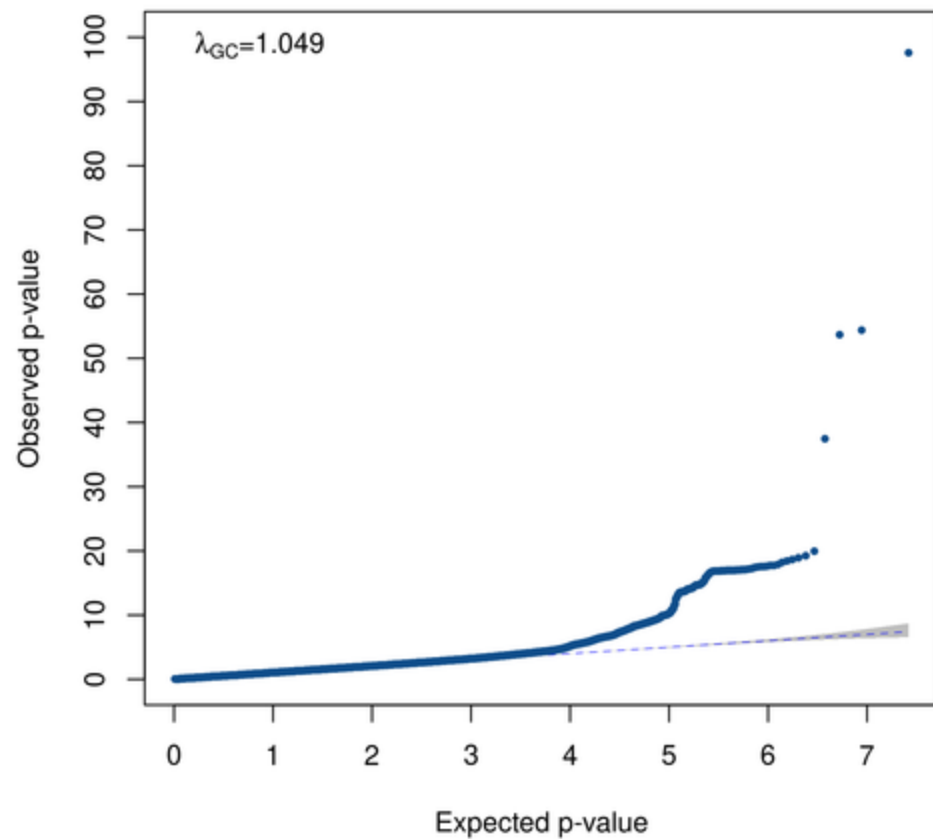

hGDNF (GDNF)

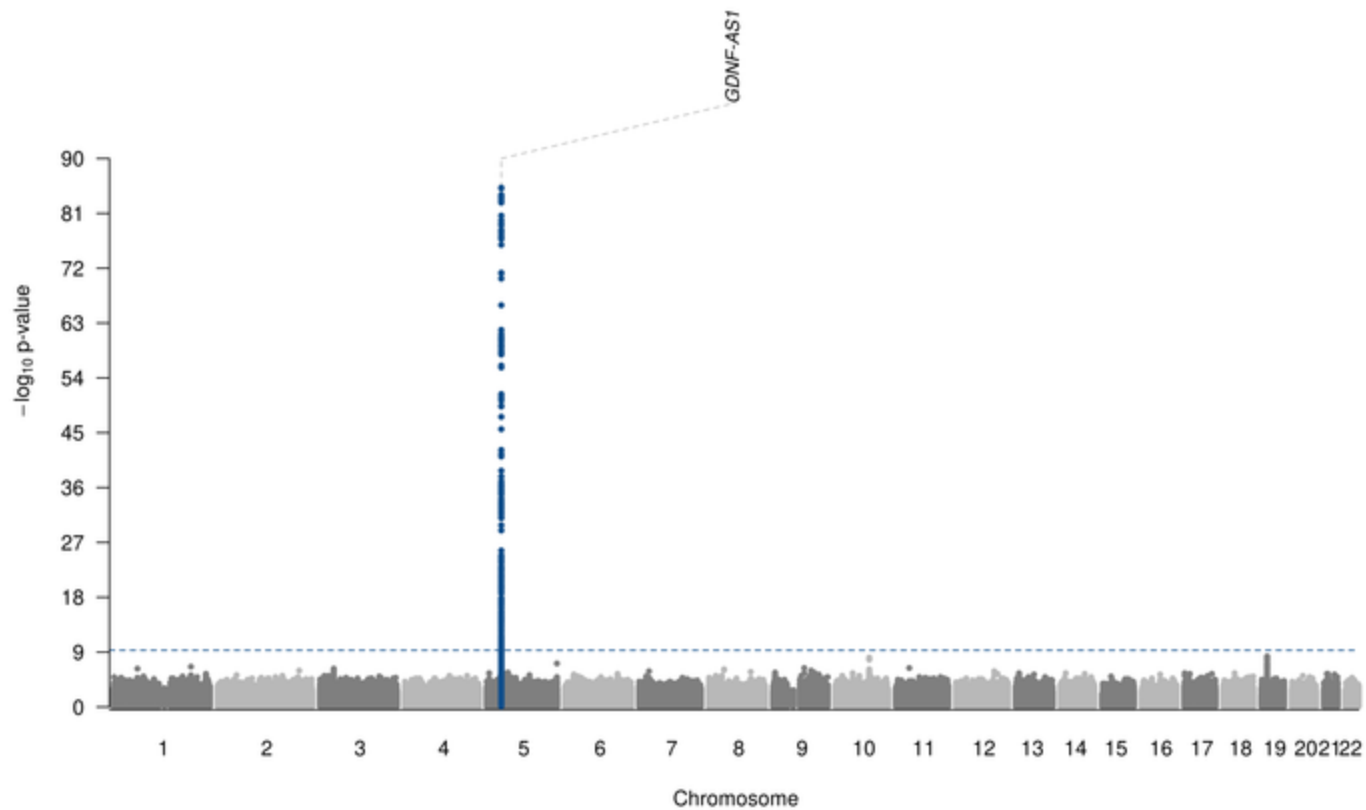

hGDNF (GDNF)

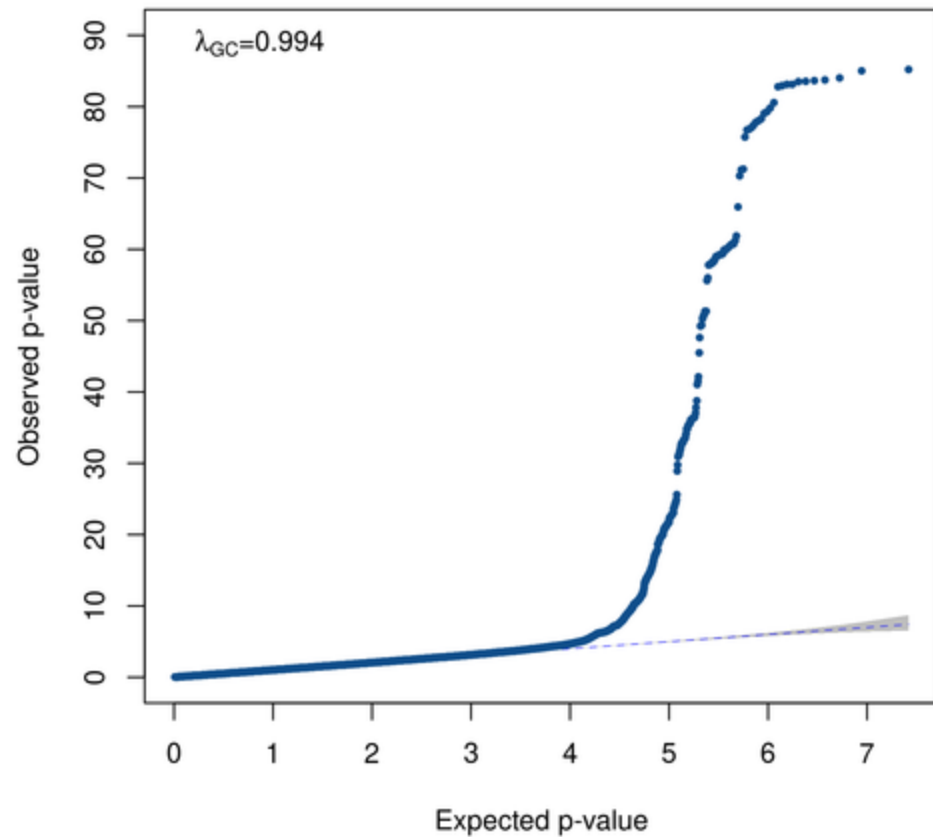

HGF (HGF)

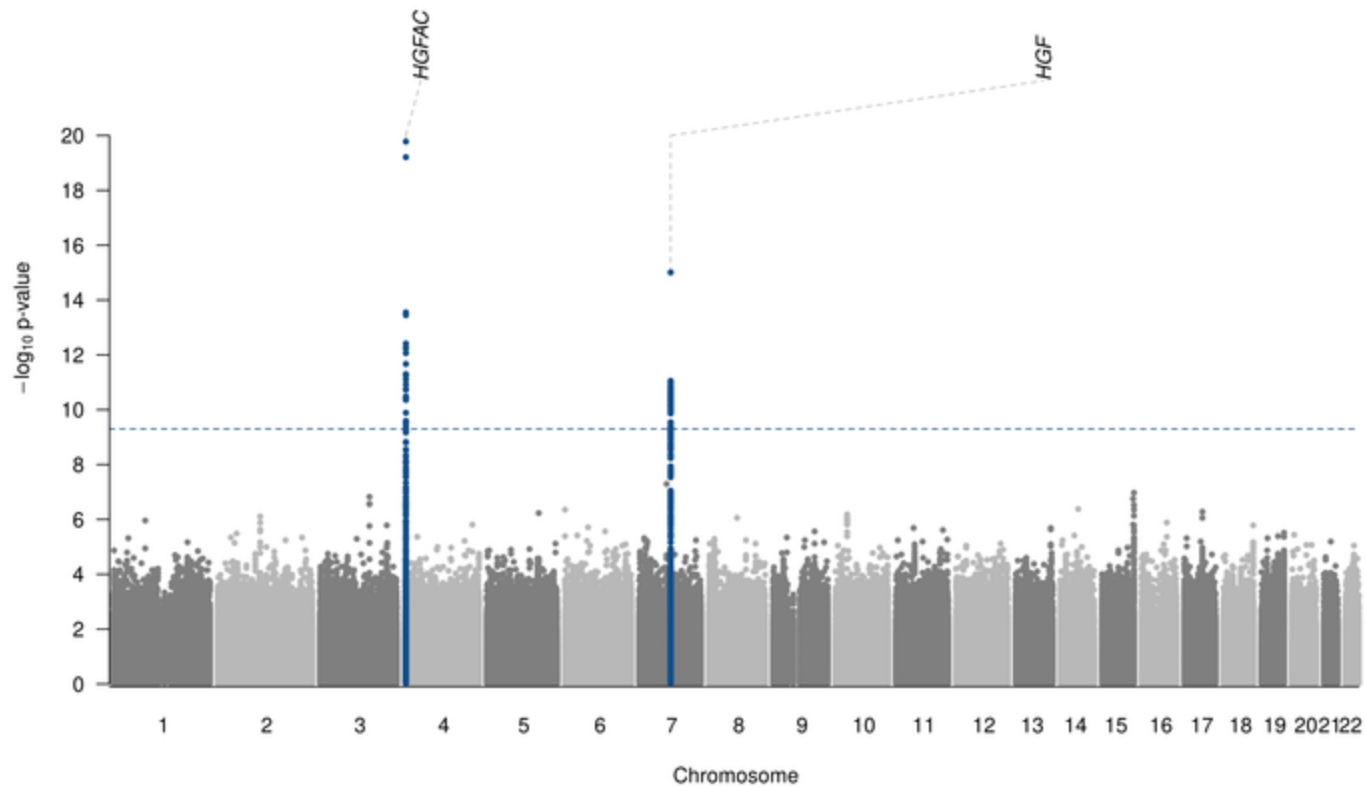

HGF (HGF)

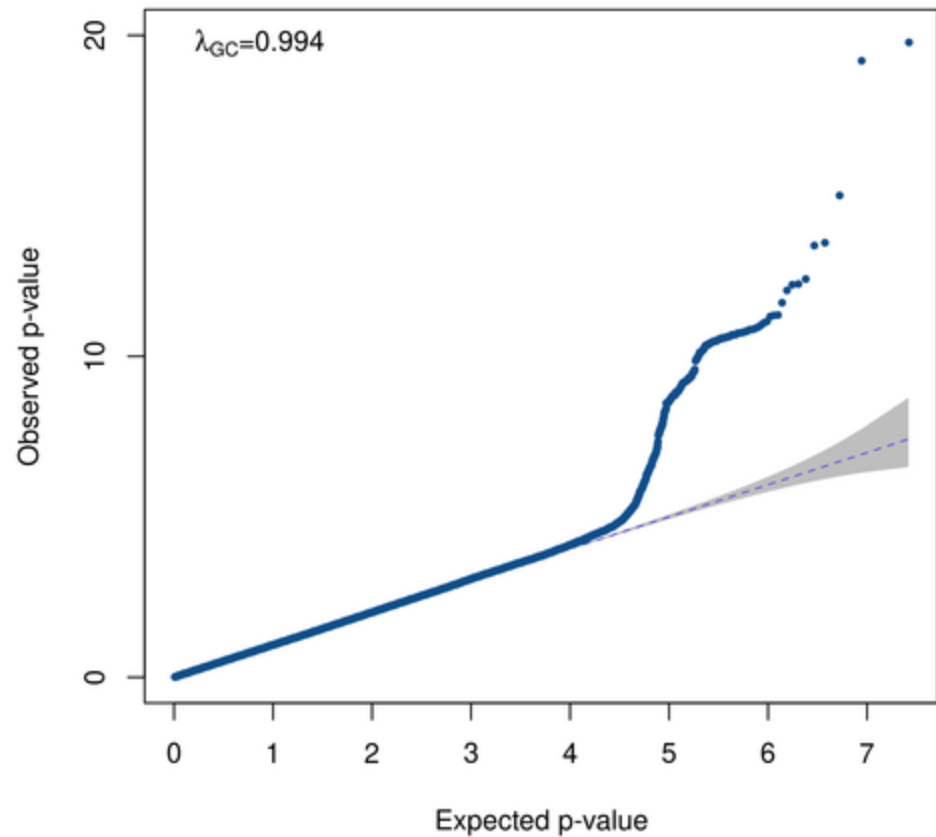

IFN-gamma (IFNG)

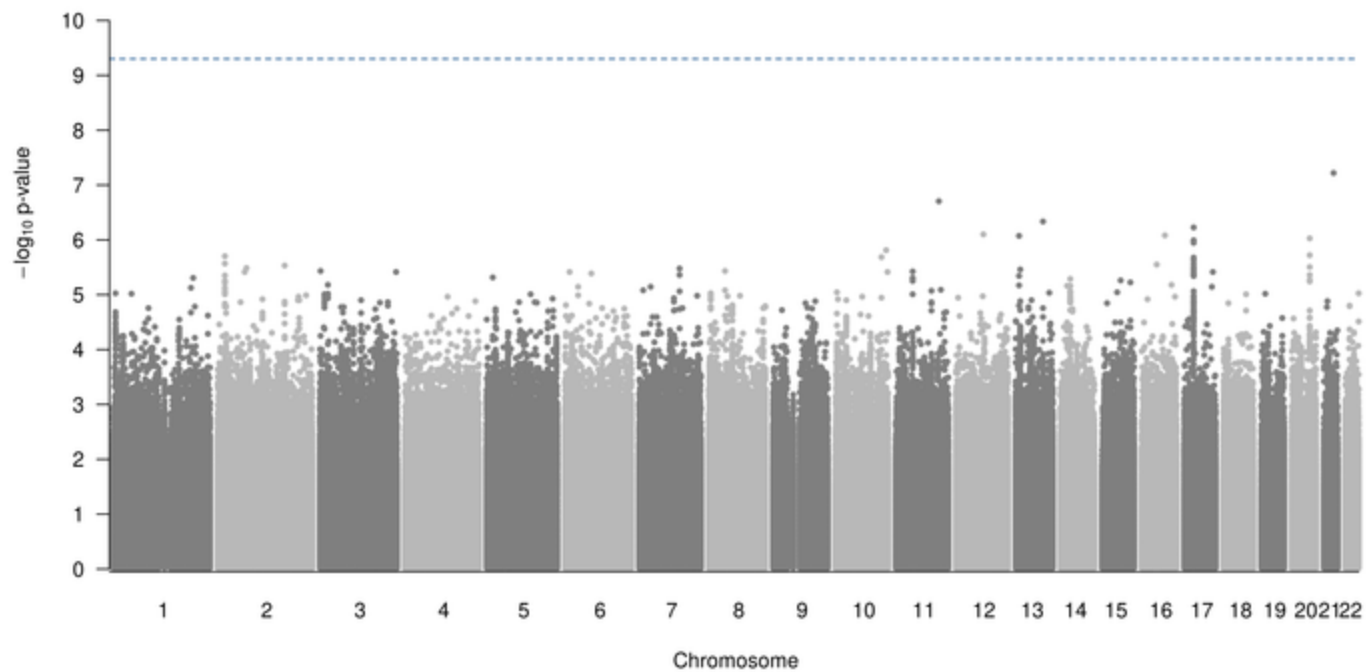

IFN-gamma (IFNG)

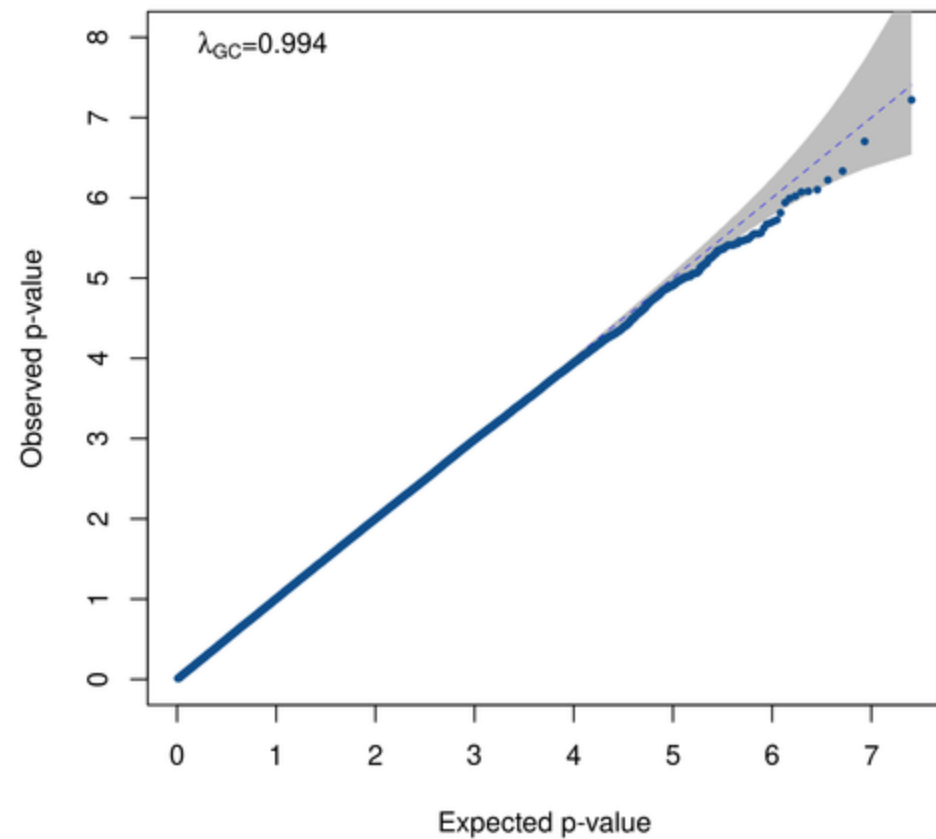

IL-10 (IL10)

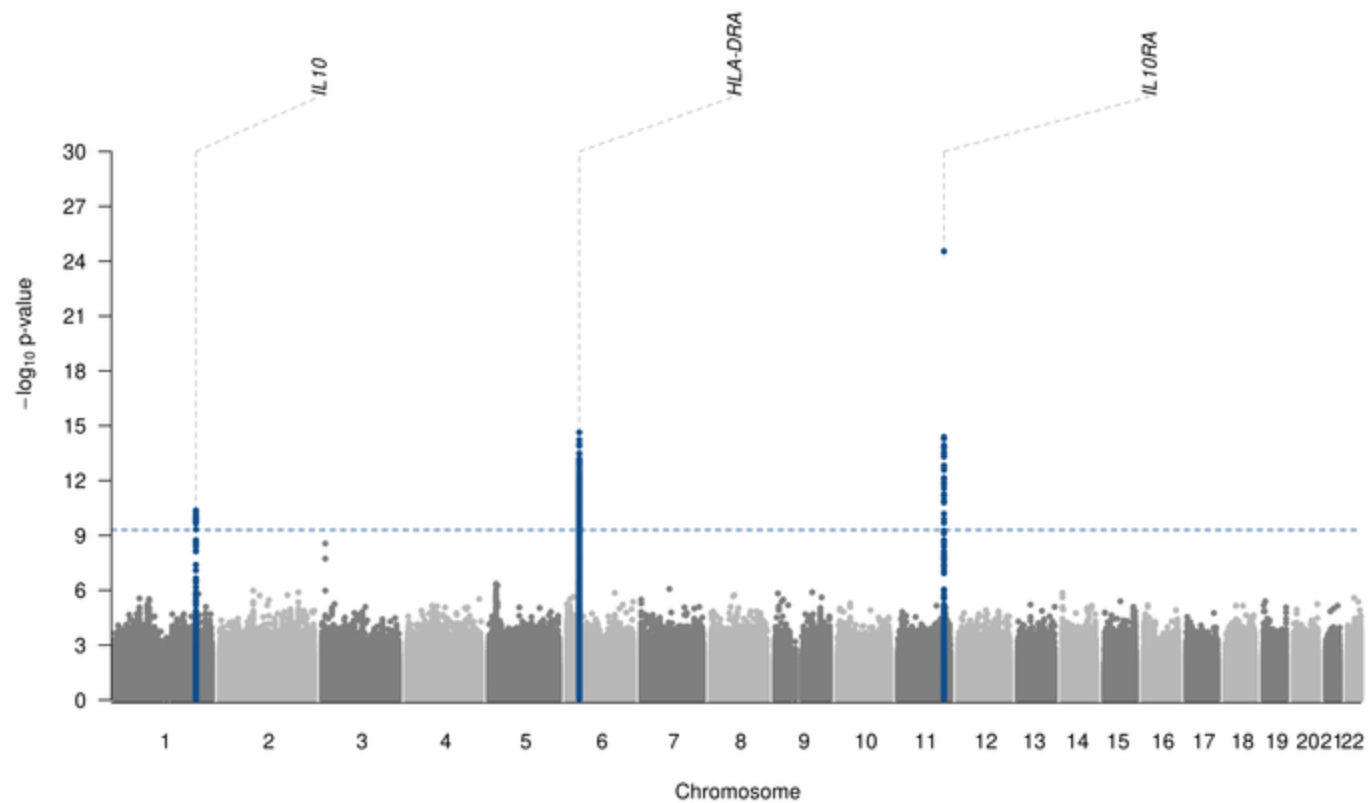

IL-10 (IL10)

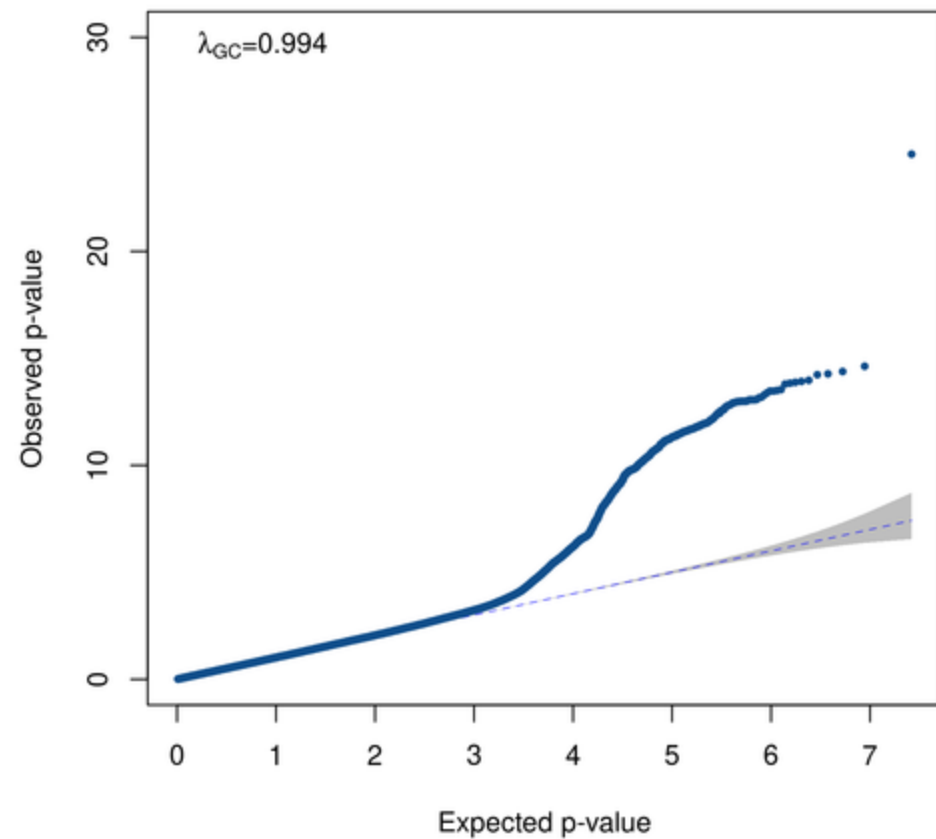

IL-10RA (IL10RA)

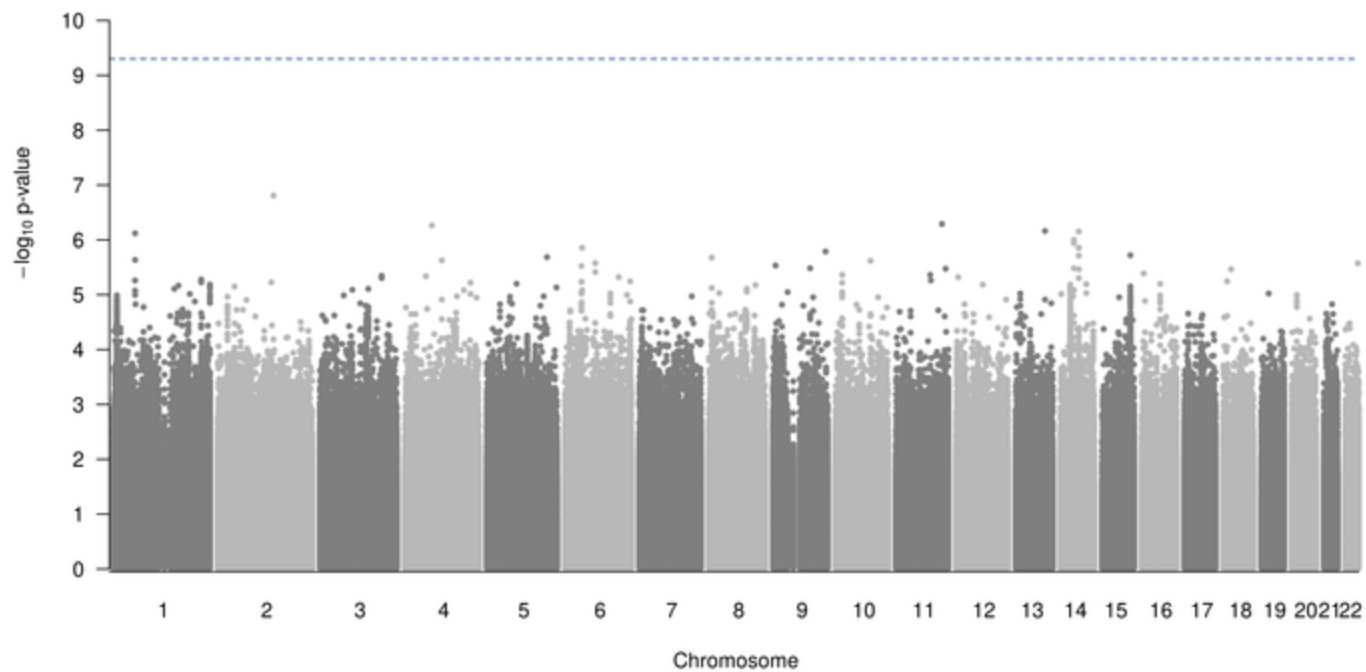

IL-10RA (IL10RA)

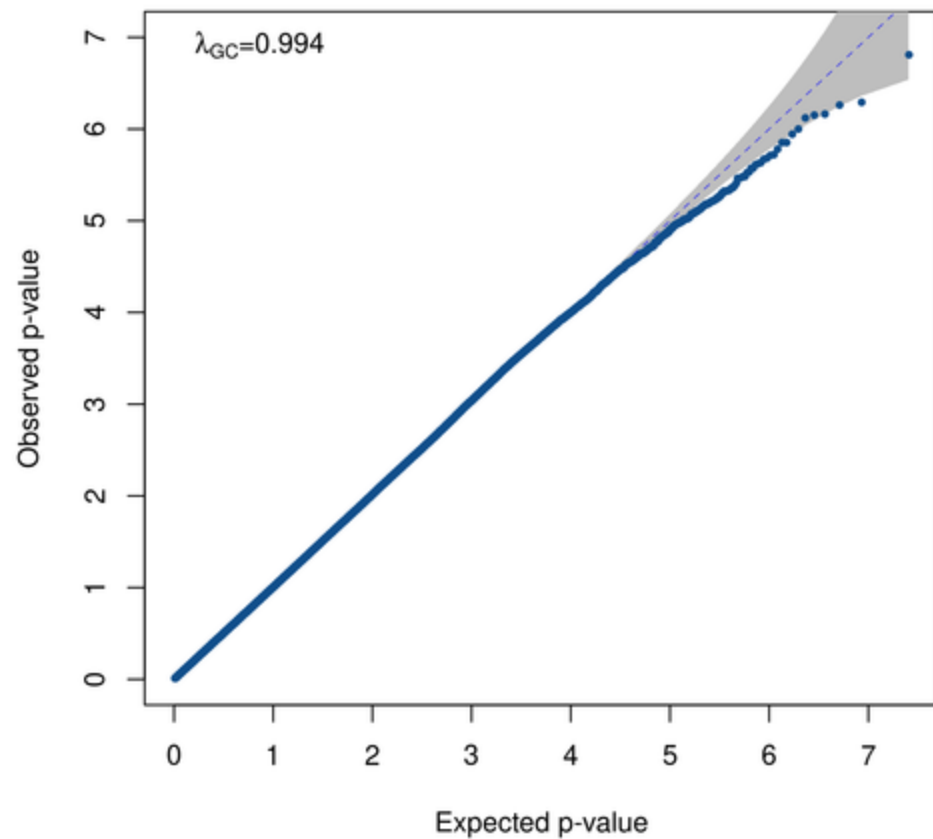

IL10RB (IL10RB)

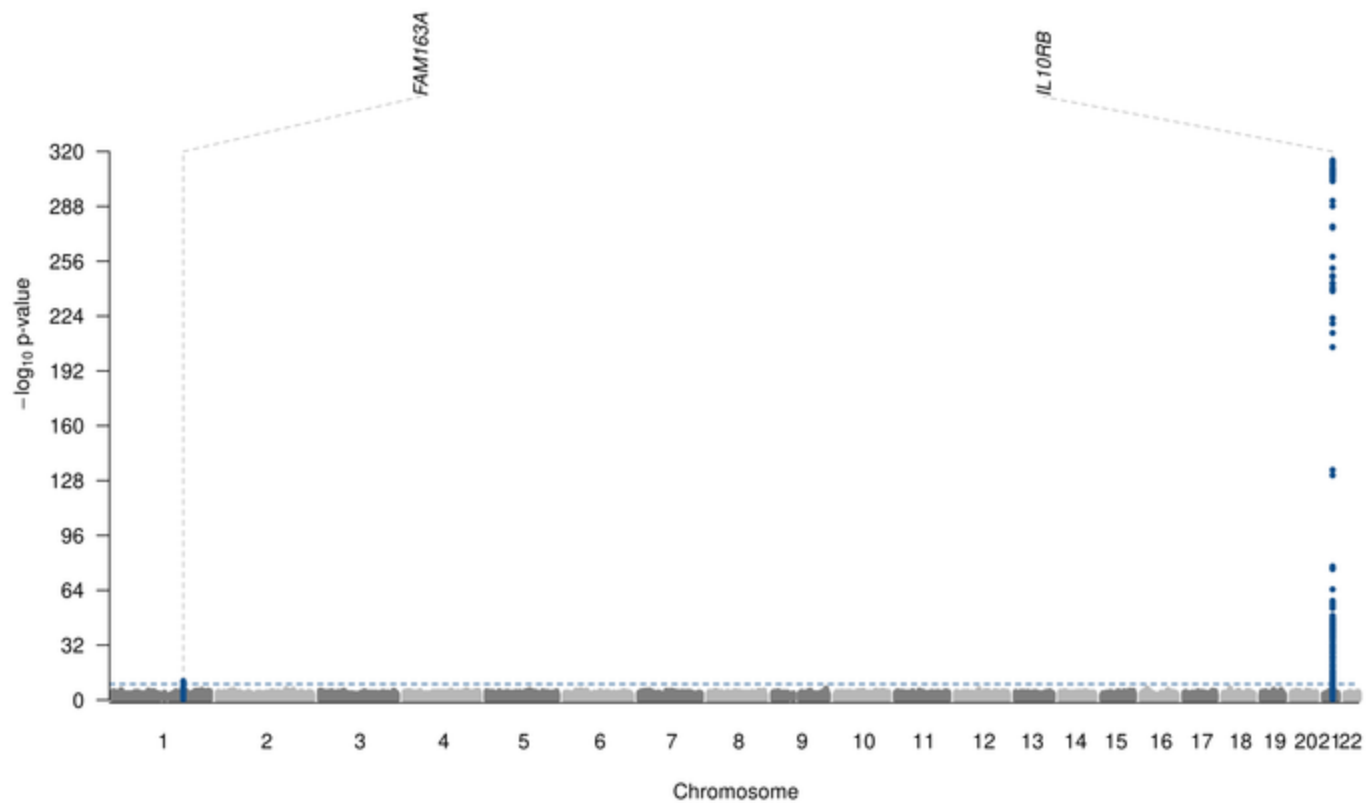

IL10RB (IL10RB)

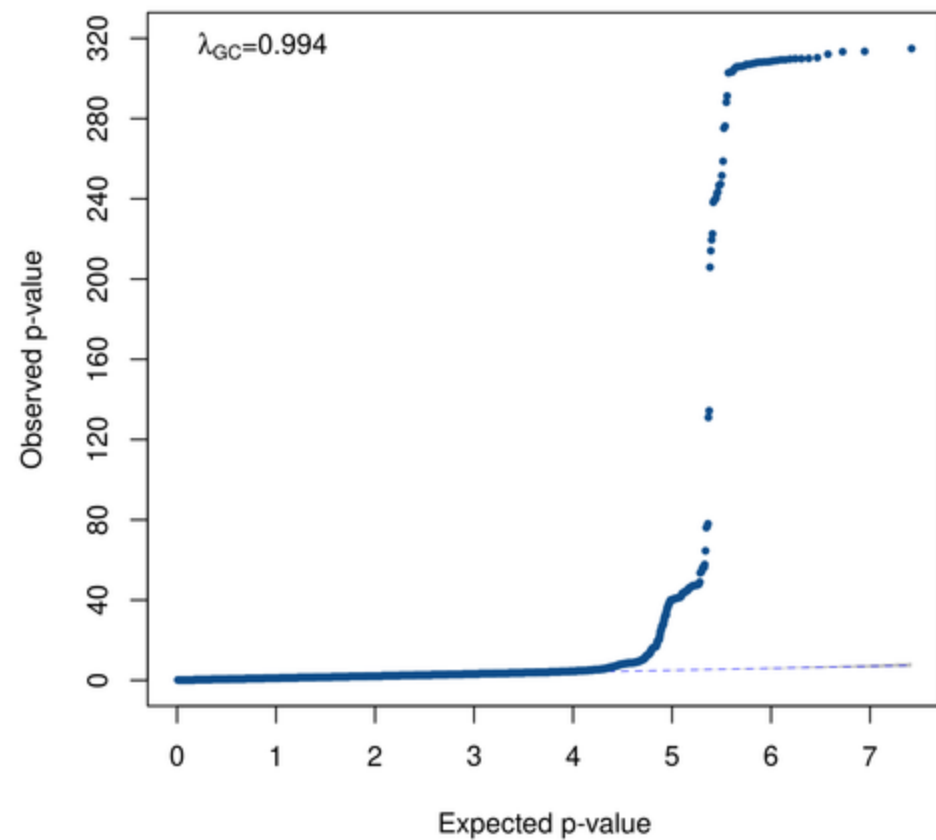



IL-12B (IL12B)

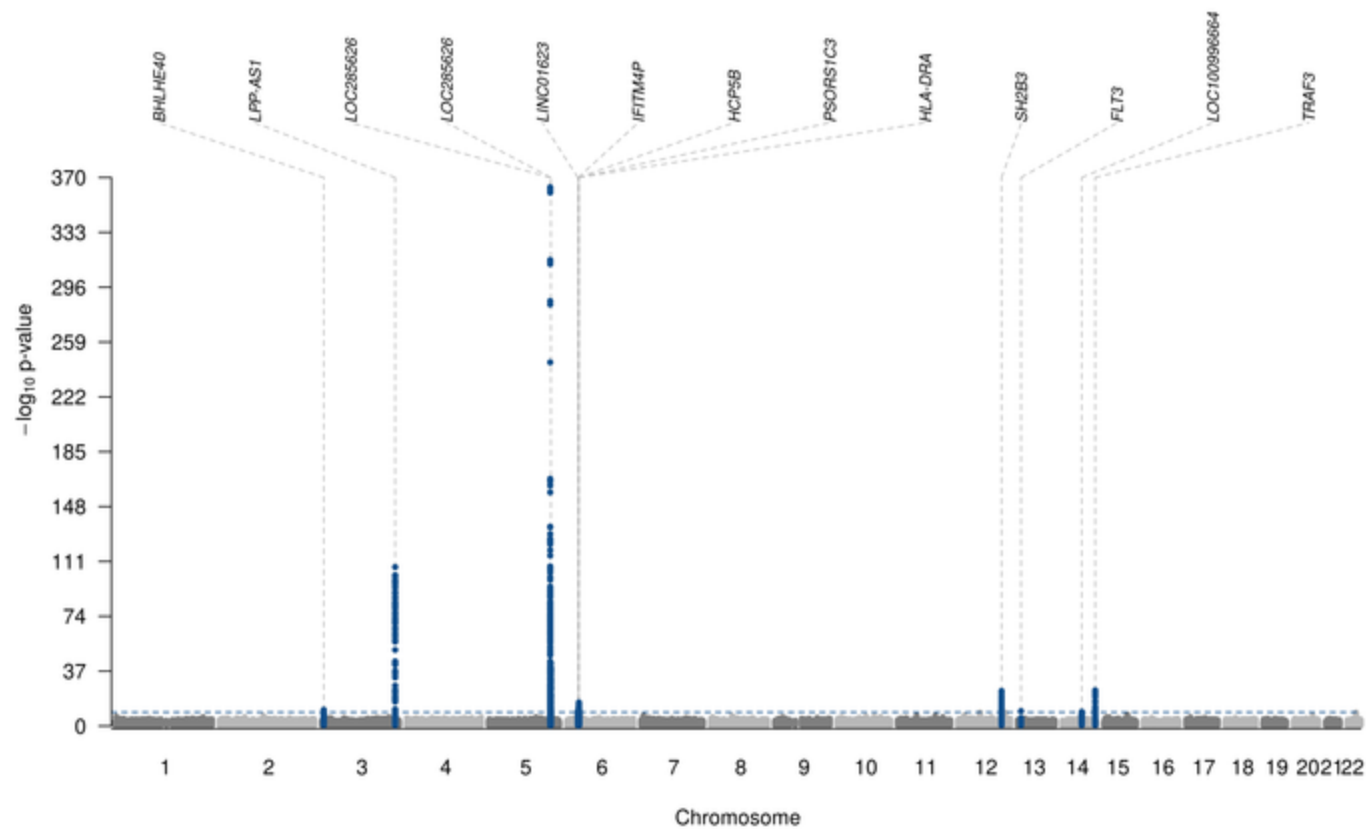

IL-12B (IL12B)

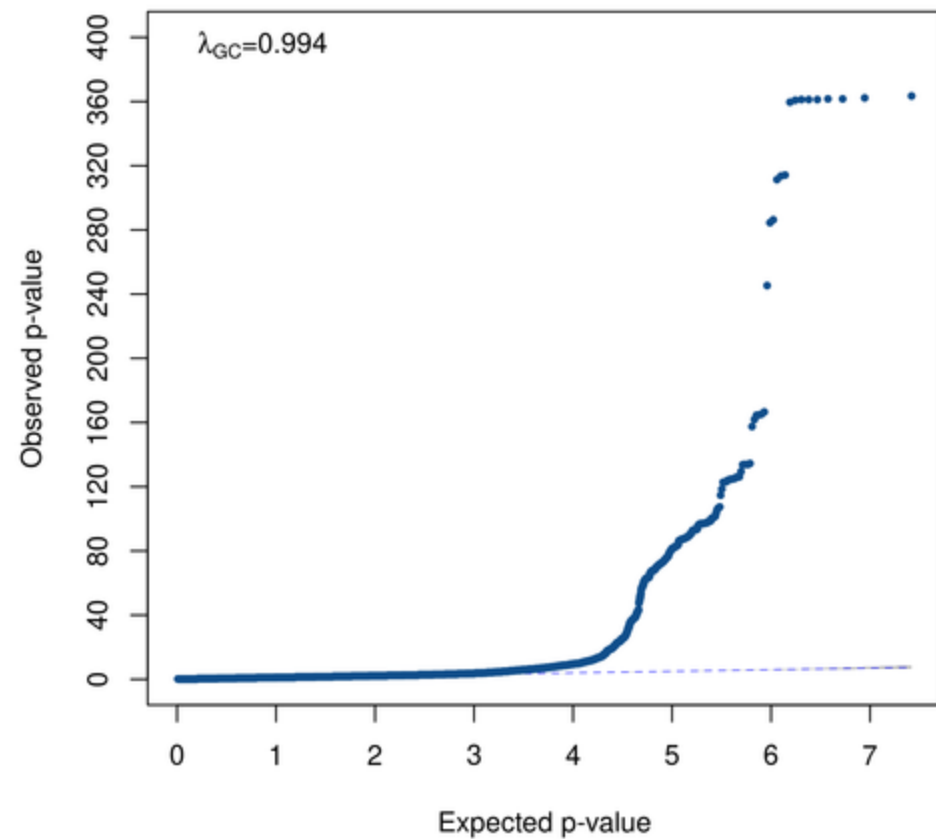

IL-13 (IL13)

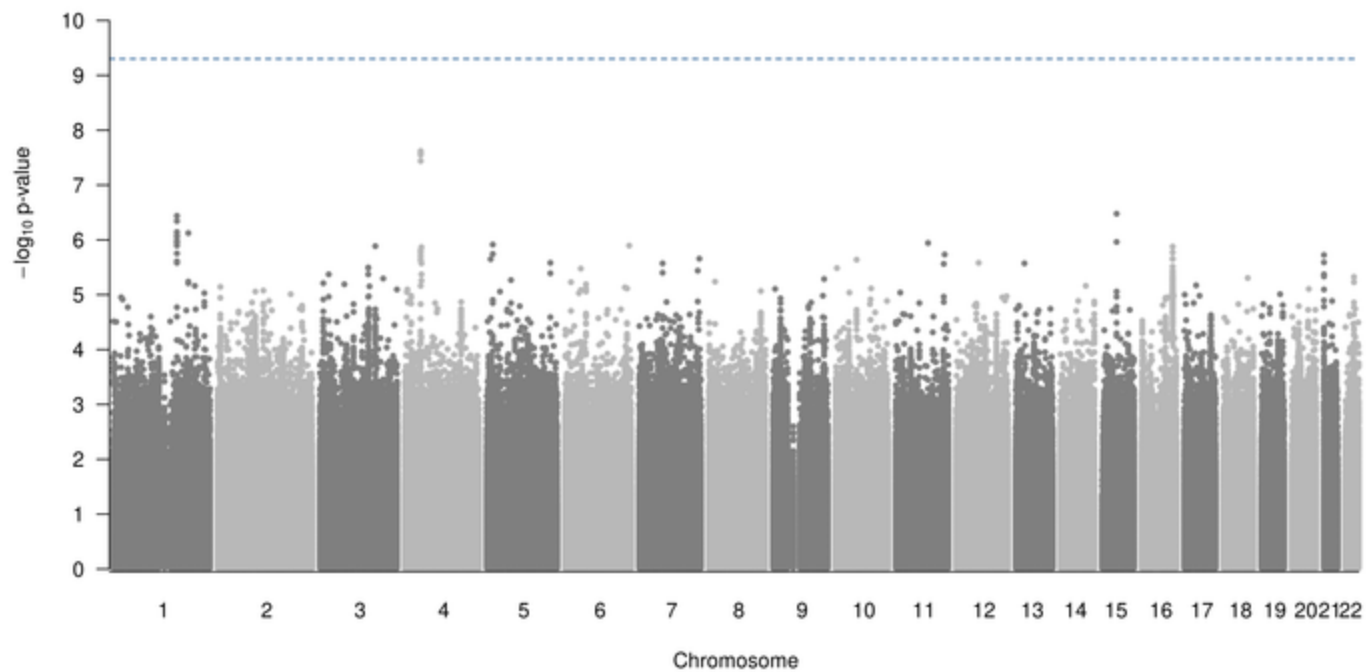

IL-13 (IL13)

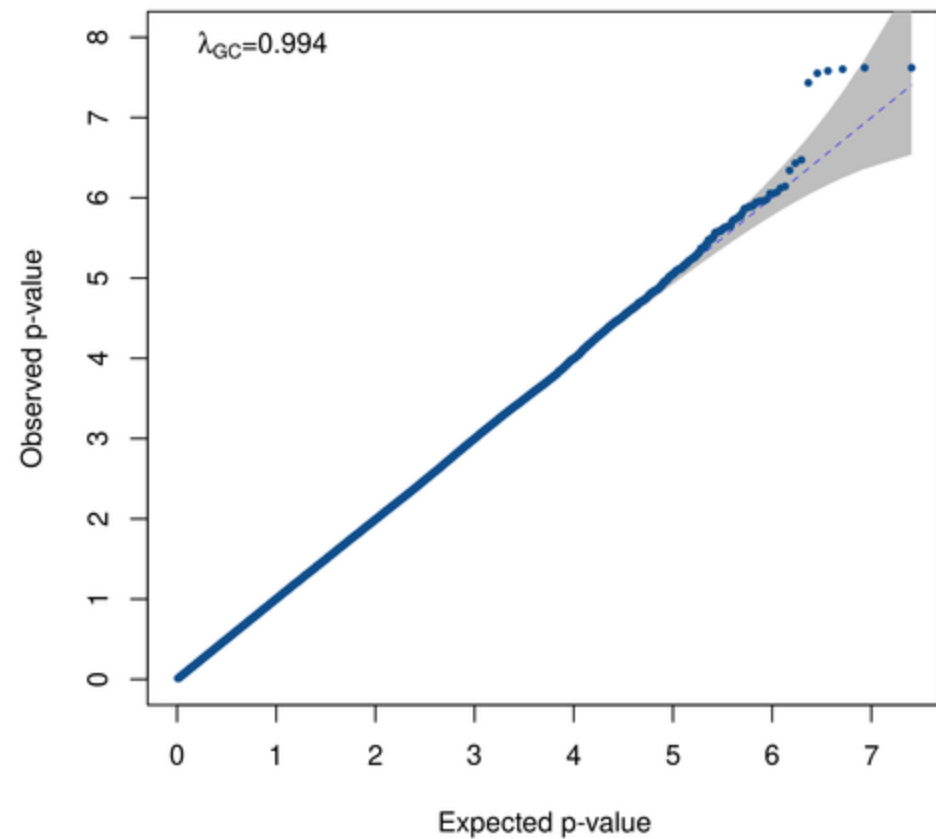

IL-15RA (IL15RA)

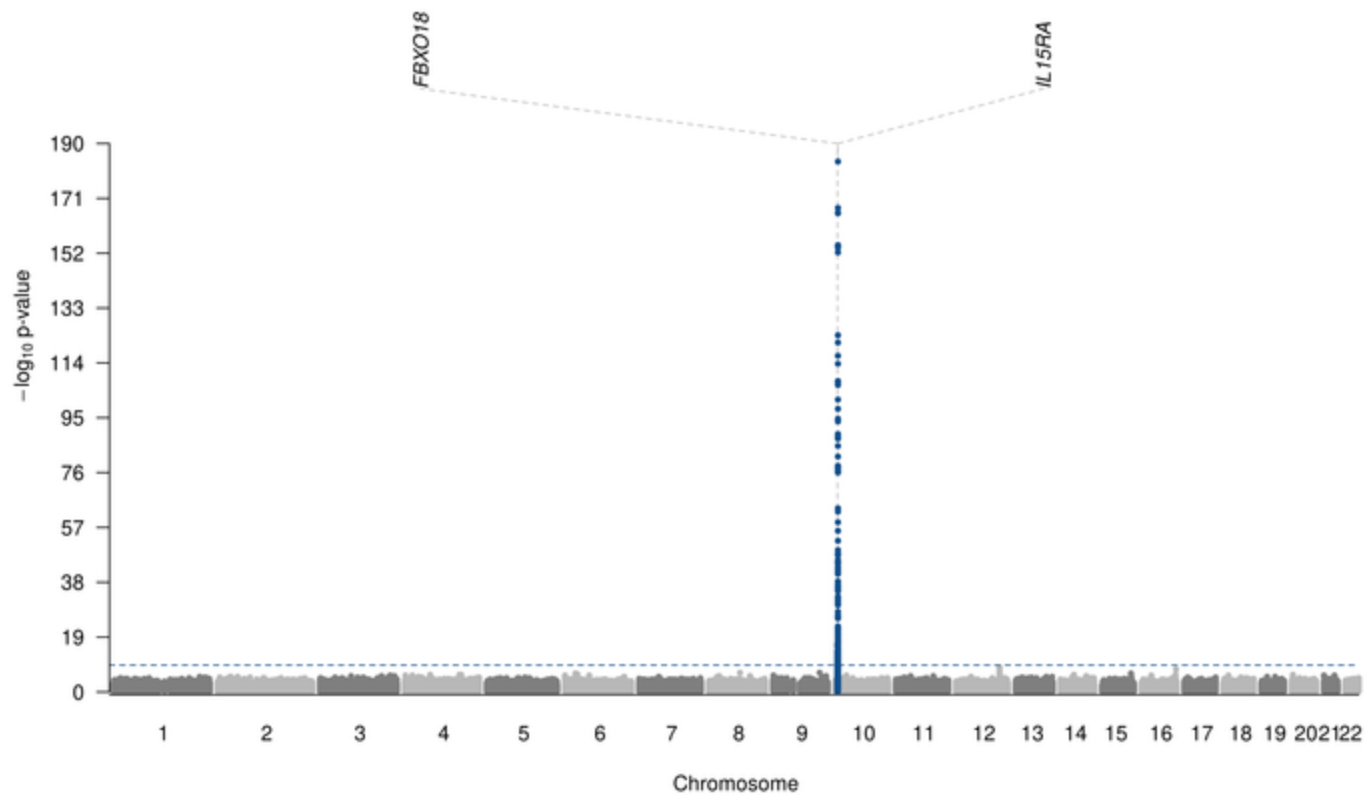

IL-15RA (IL15RA)

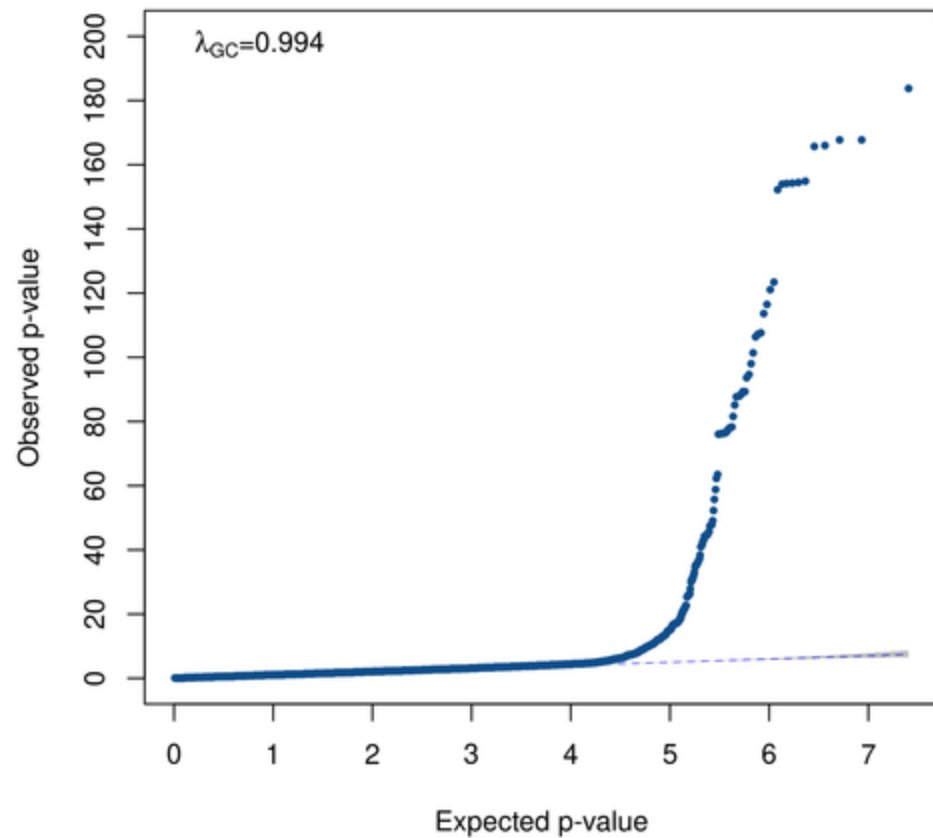

IL-17A (IL17A)

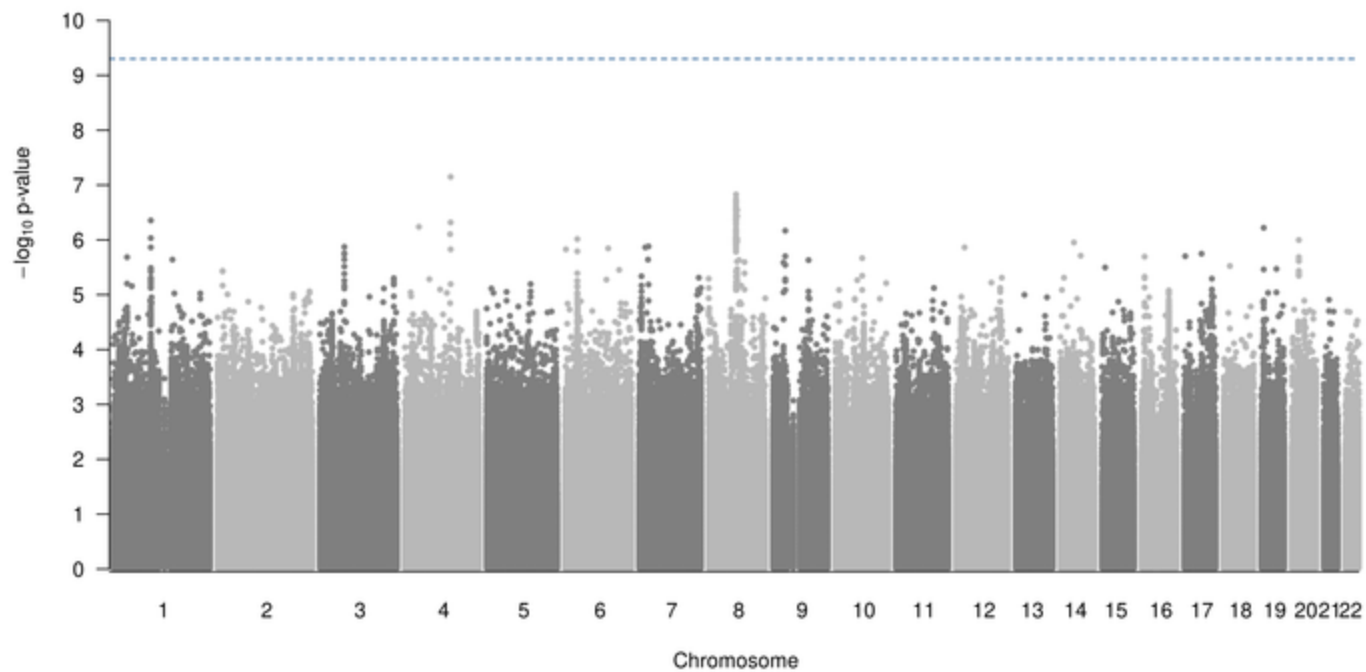

IL-17A (IL17A)

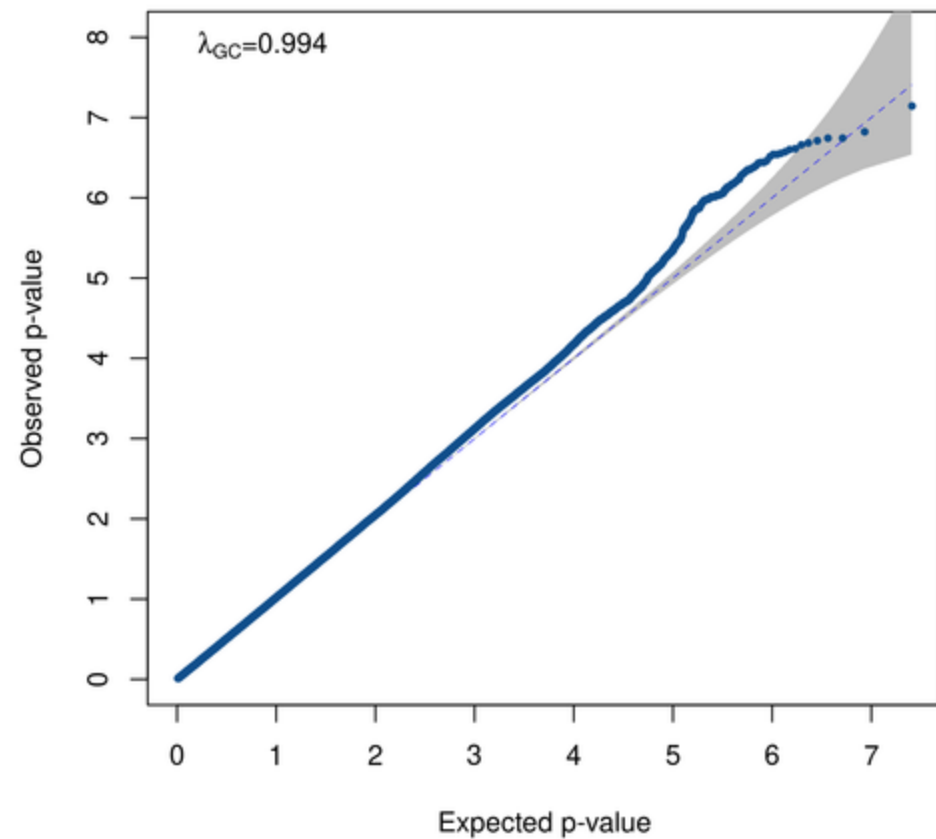

IL-17C (IL17C)

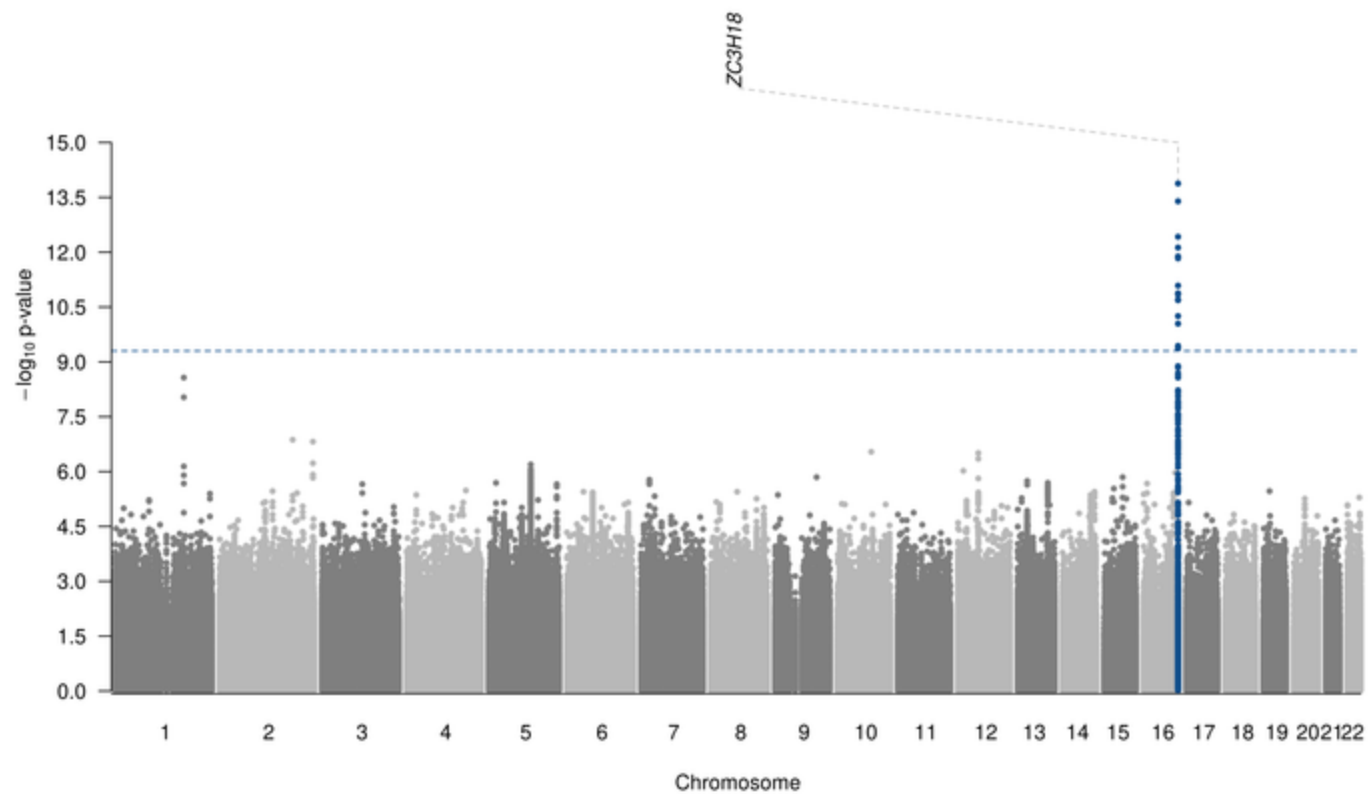

IL-17C (IL17C)

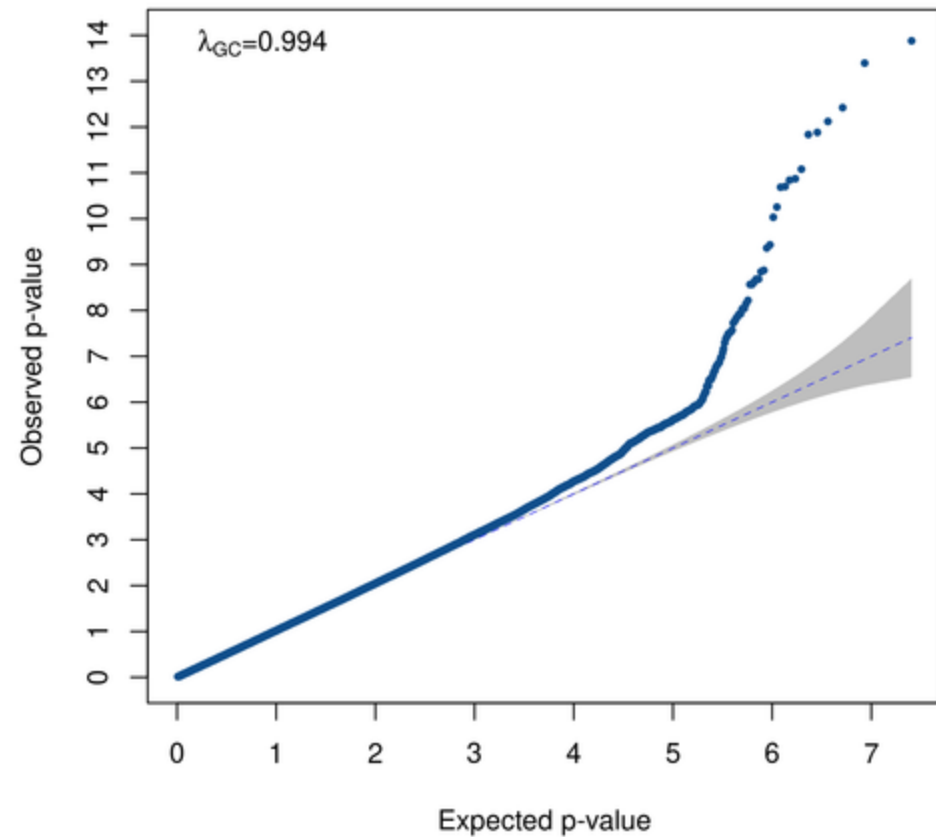

IL-18 (IL18)

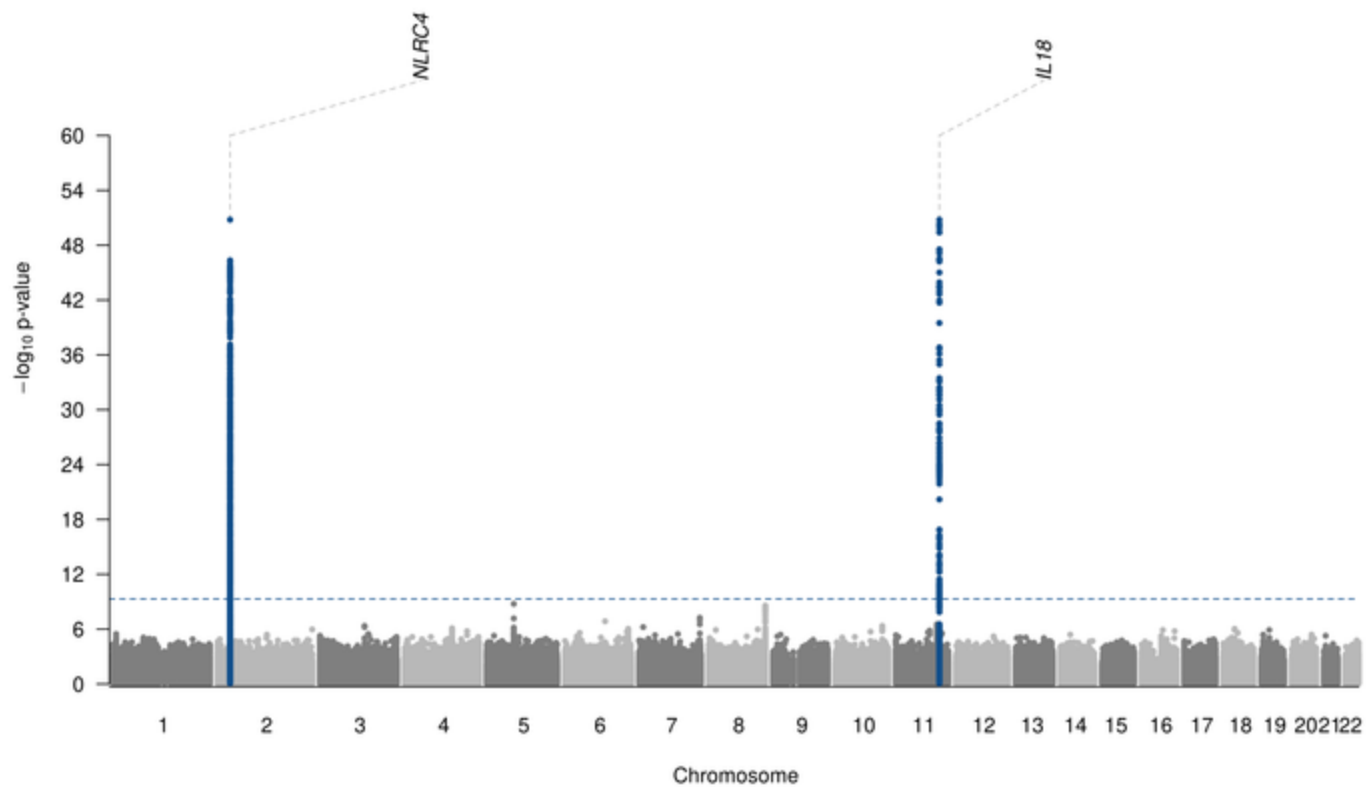

IL-18 (IL18)

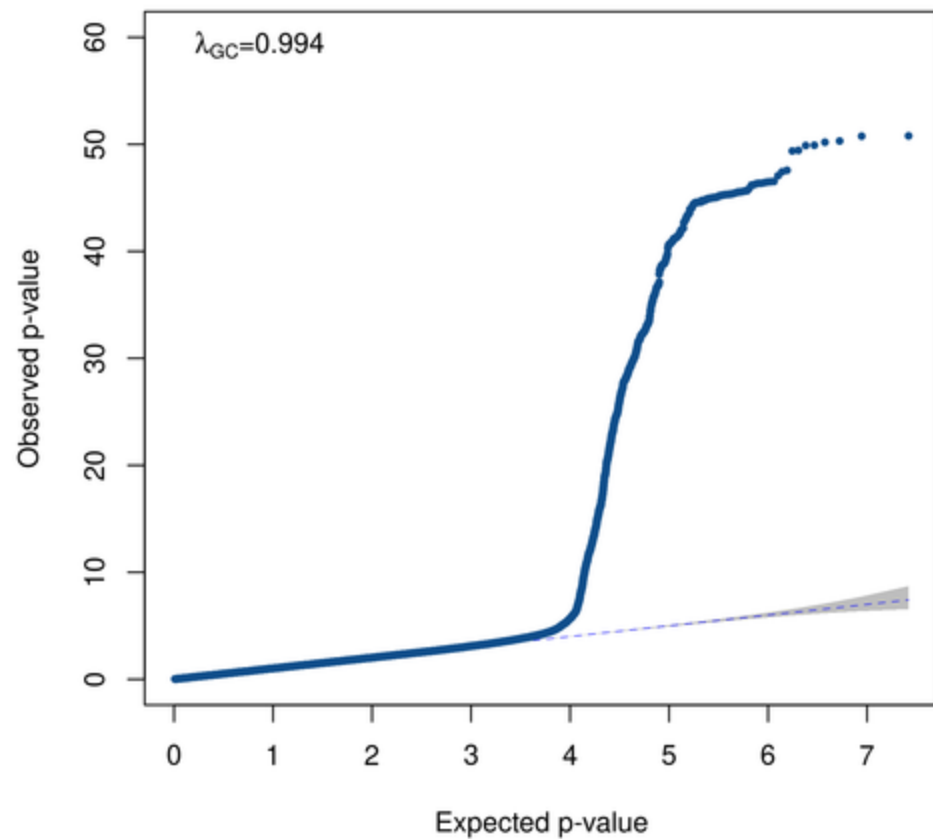

IL-18R1 (IL18R1)

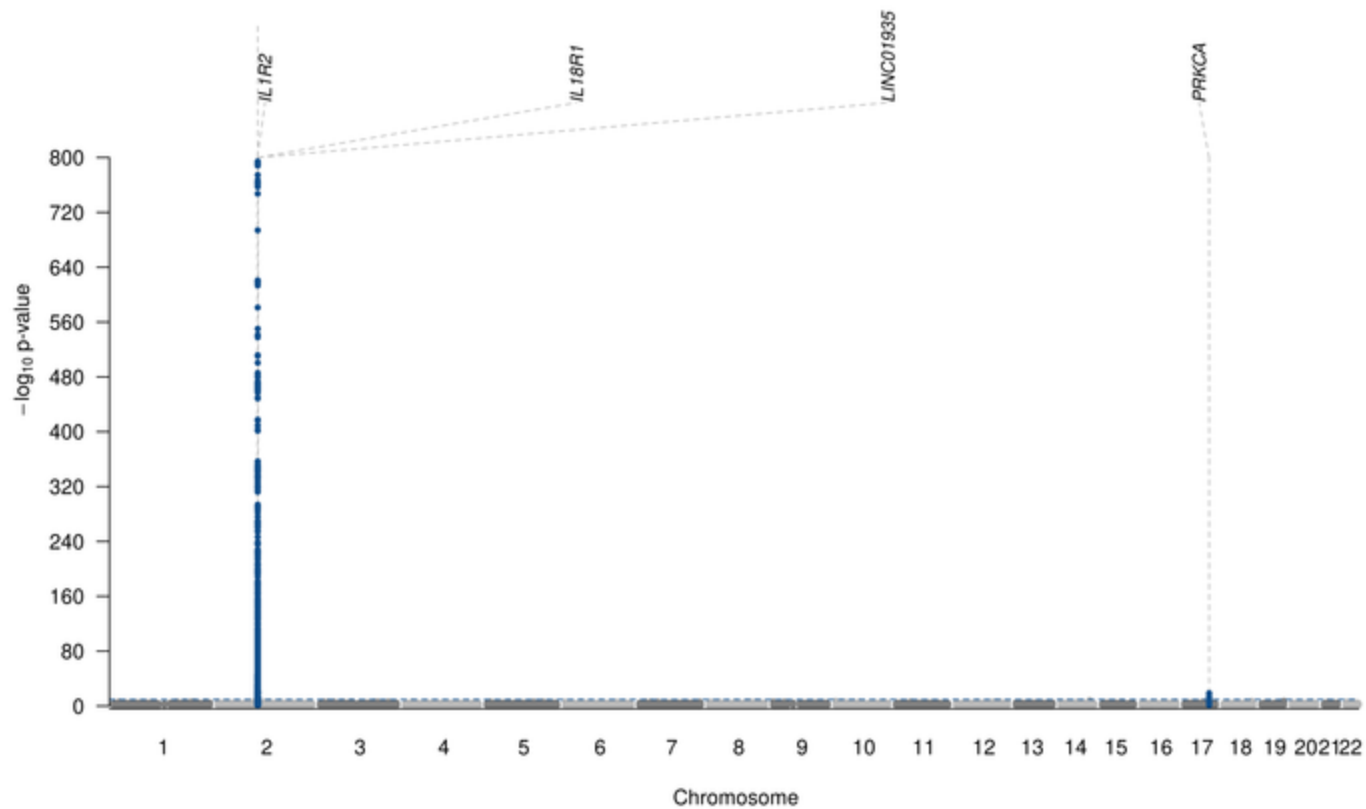

IL-18R1 (IL18R1)

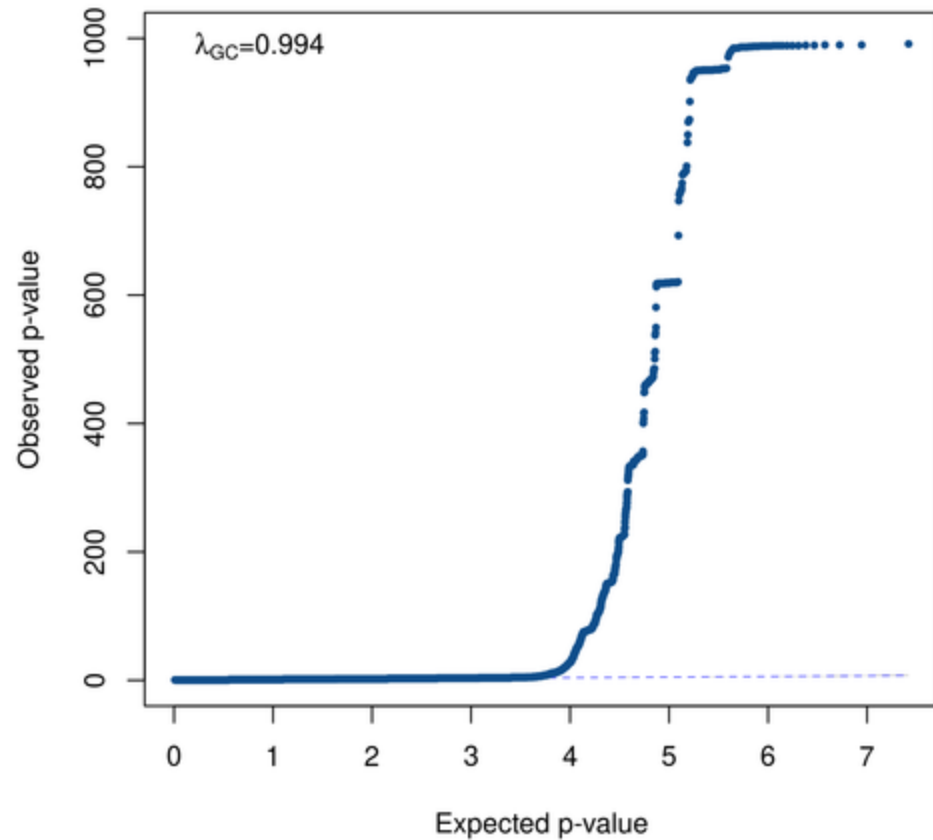

IL-1 (IL1A)

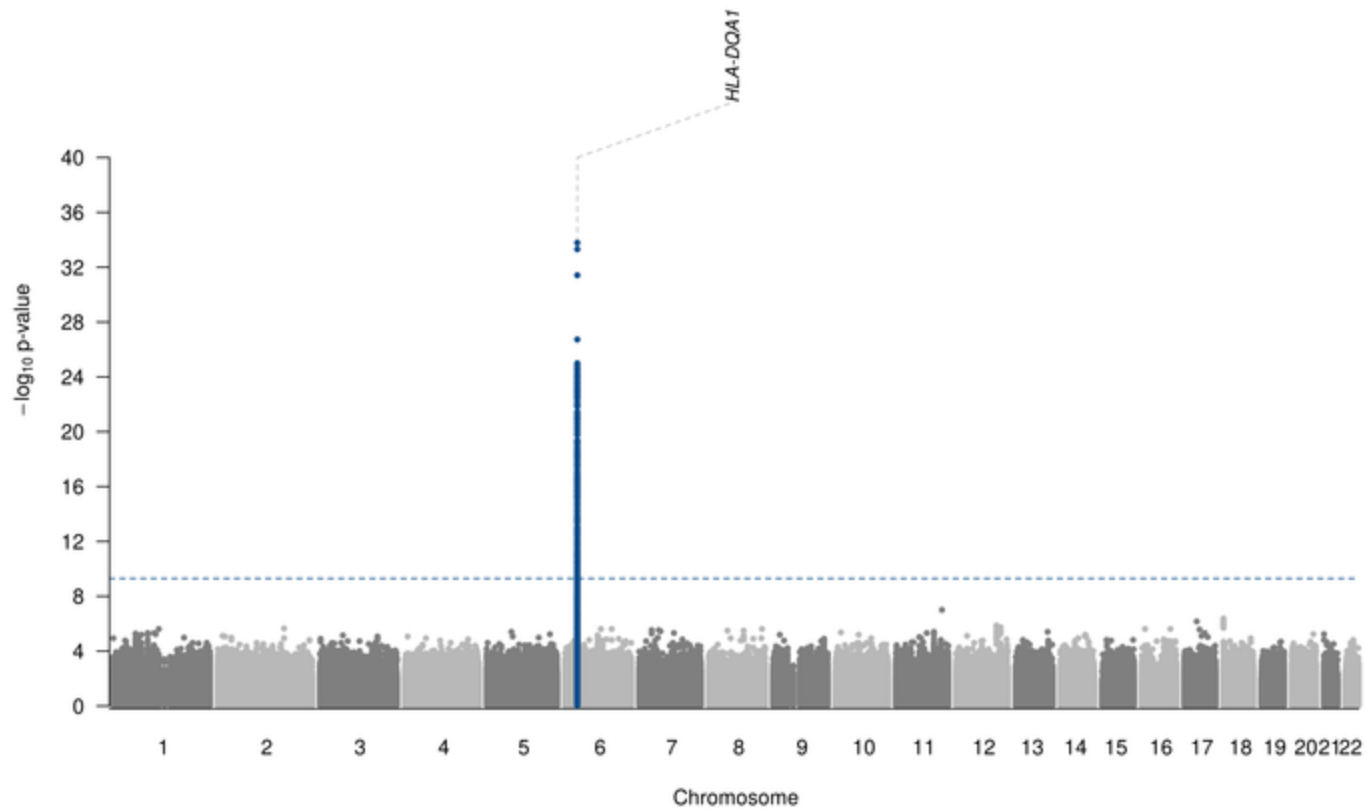

IL-1 (IL1A)

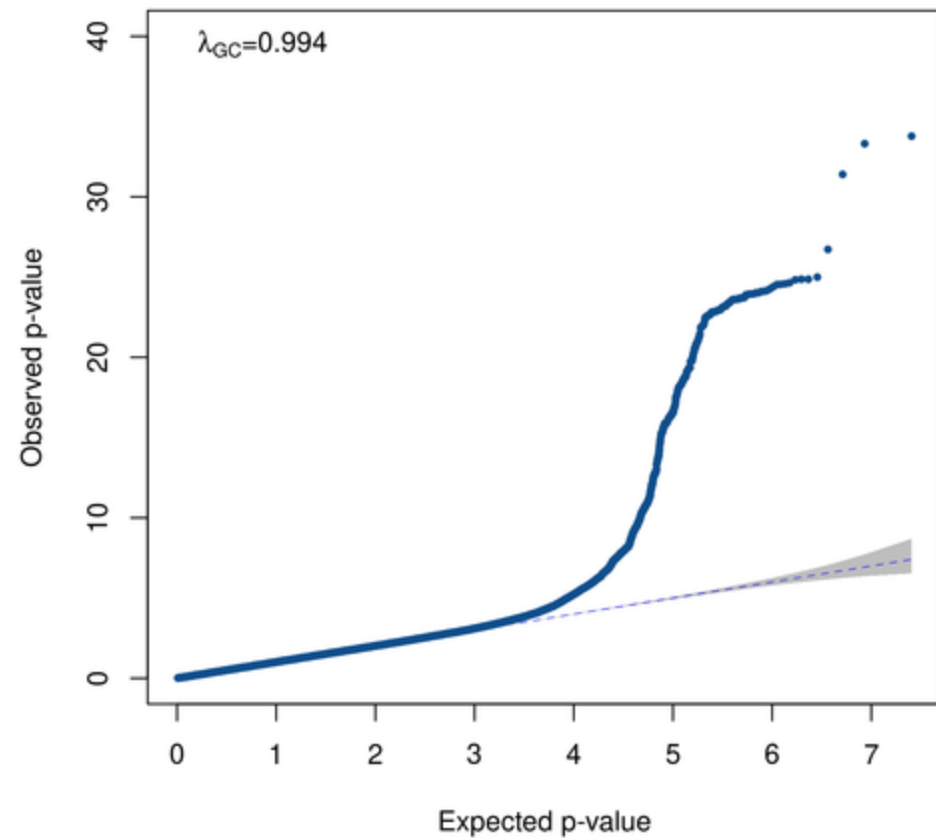



IL-20 (IL20)

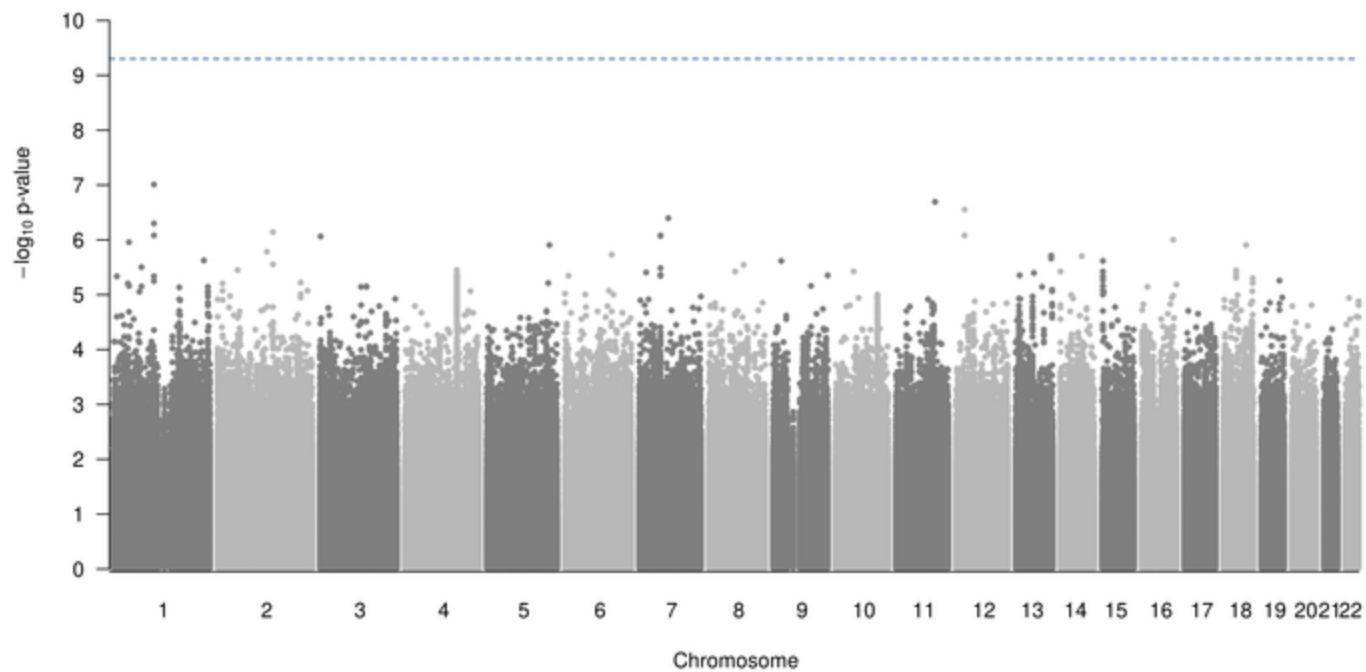

IL-20 (IL20)

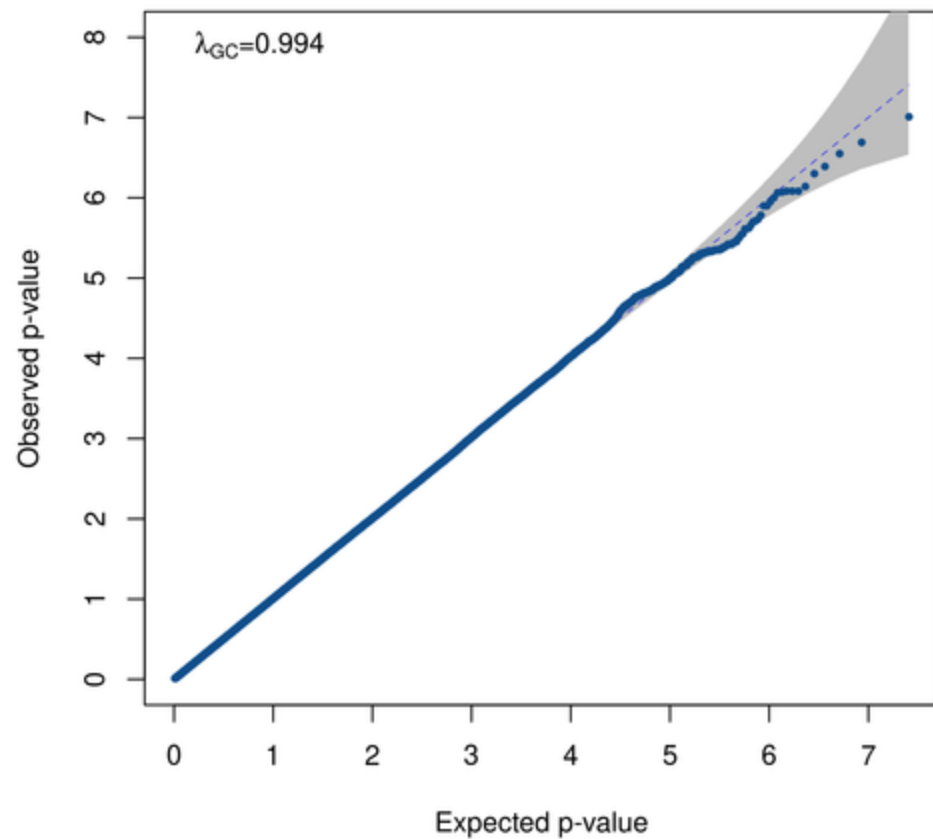

IL-20RA (IL20RA)

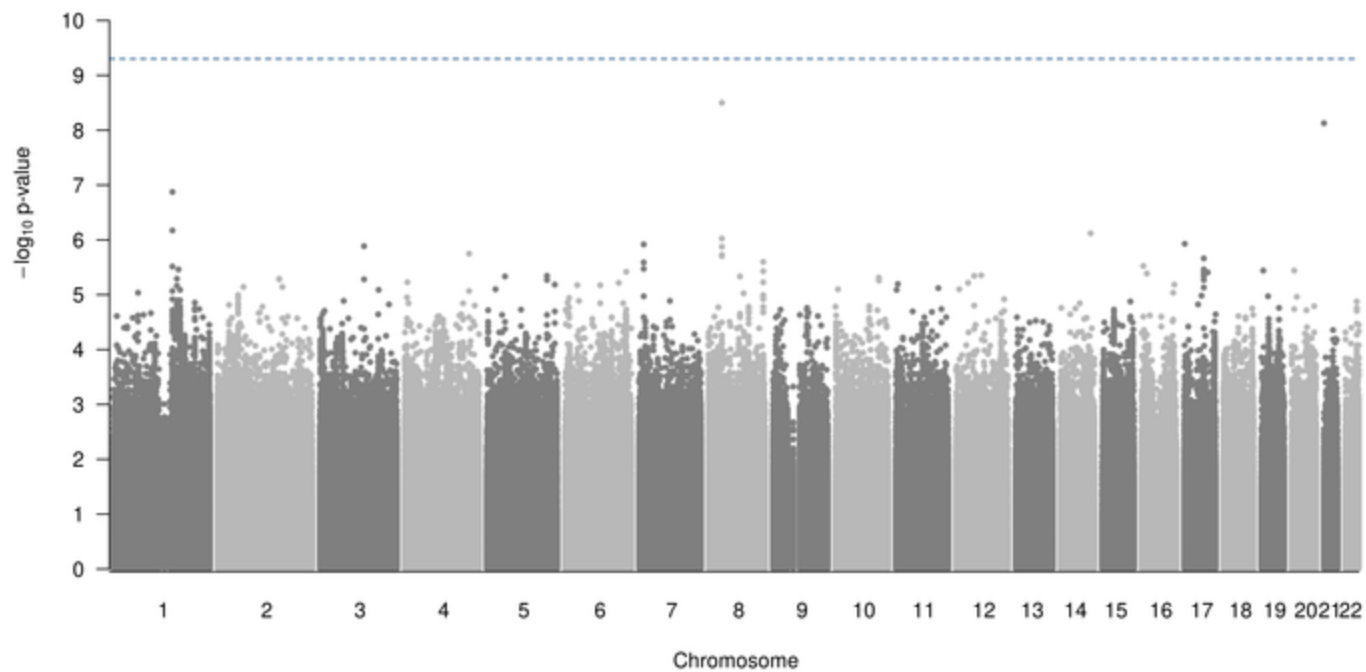

IL-20RA (IL20RA)

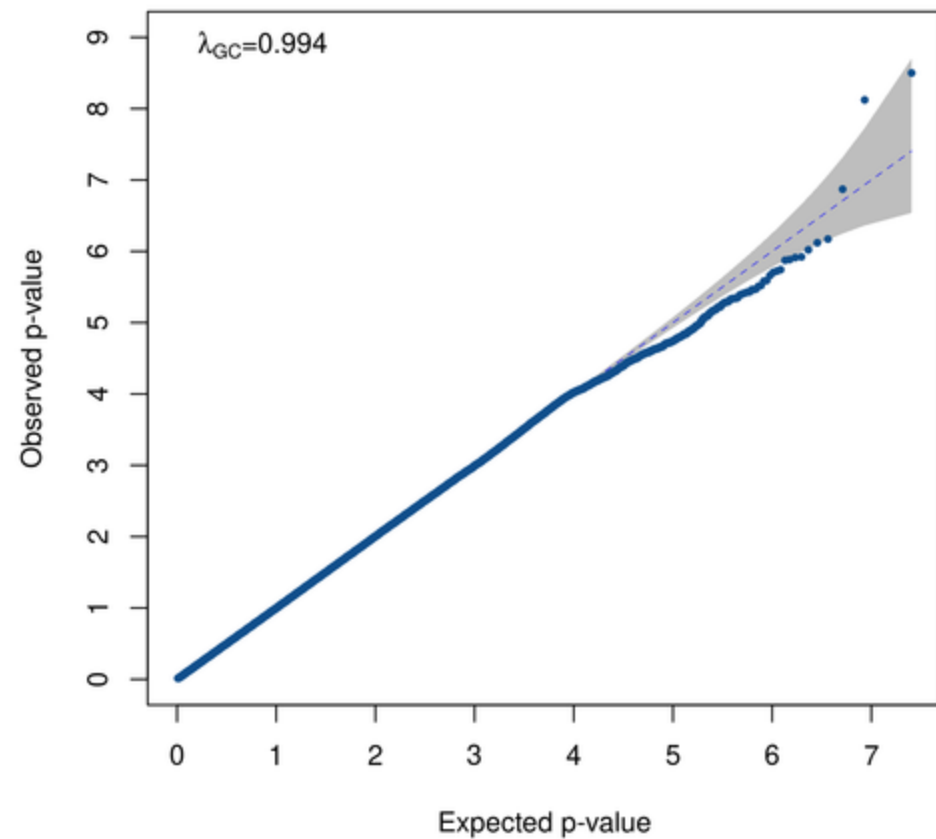

IL-22RA1 (IL22RA1)

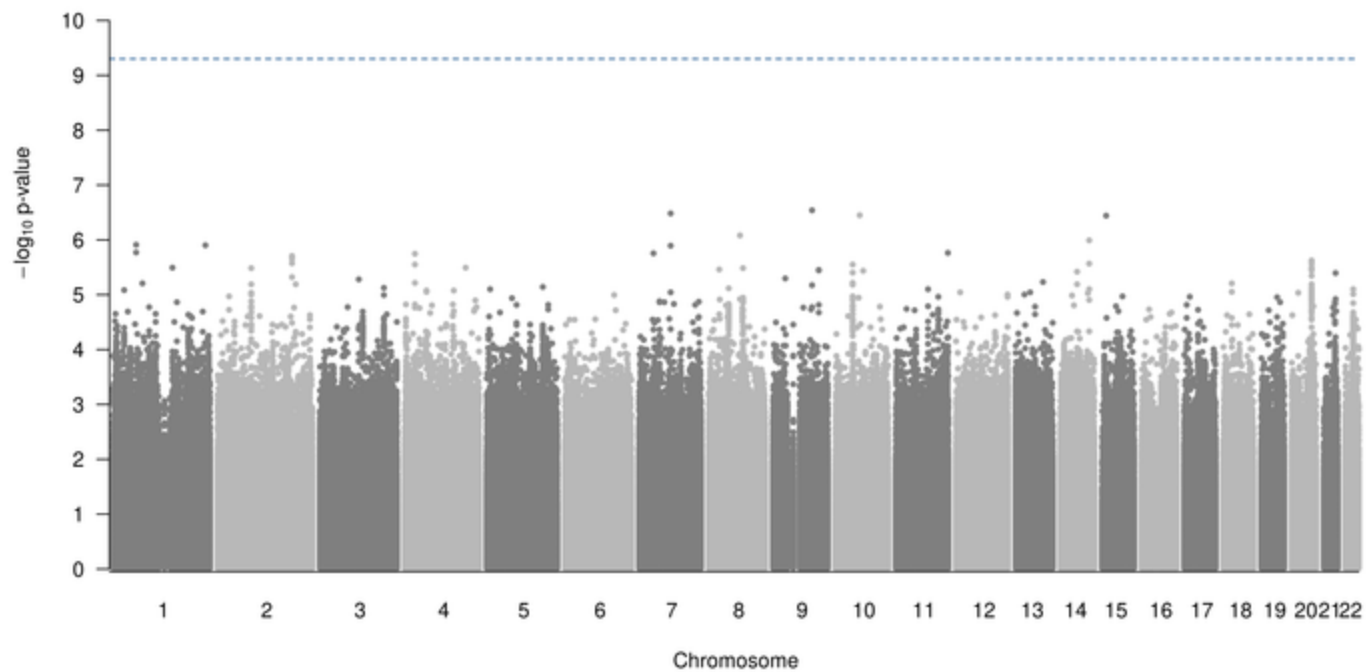

IL-22RA1 (IL22RA1)

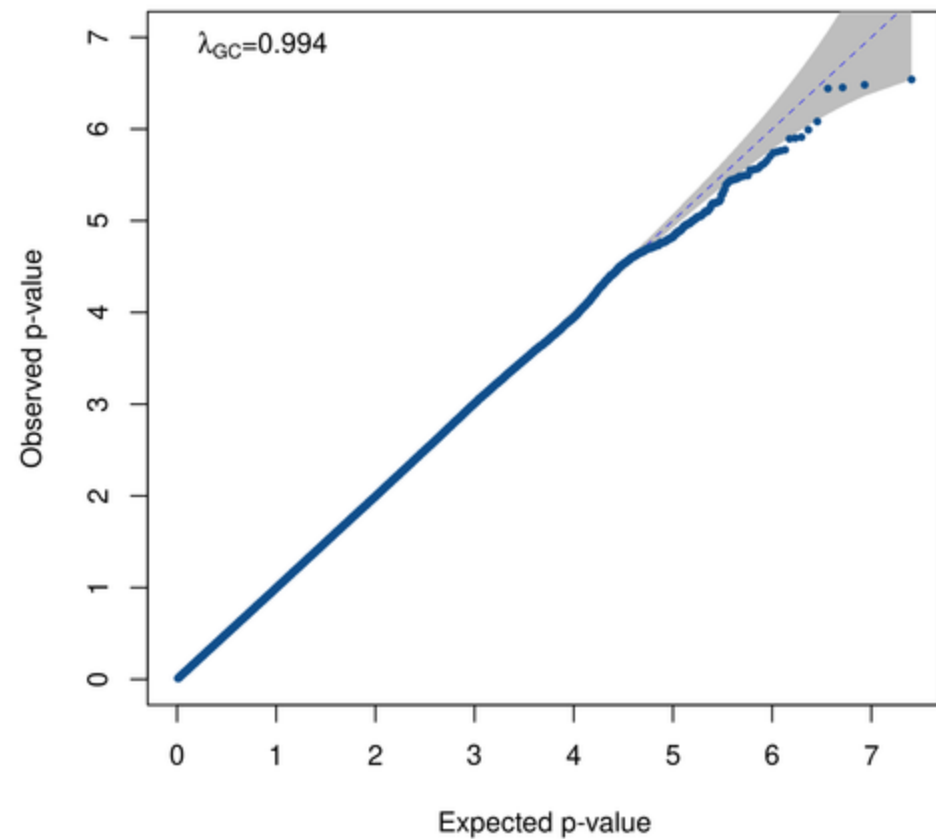

IL-24 (IL24)

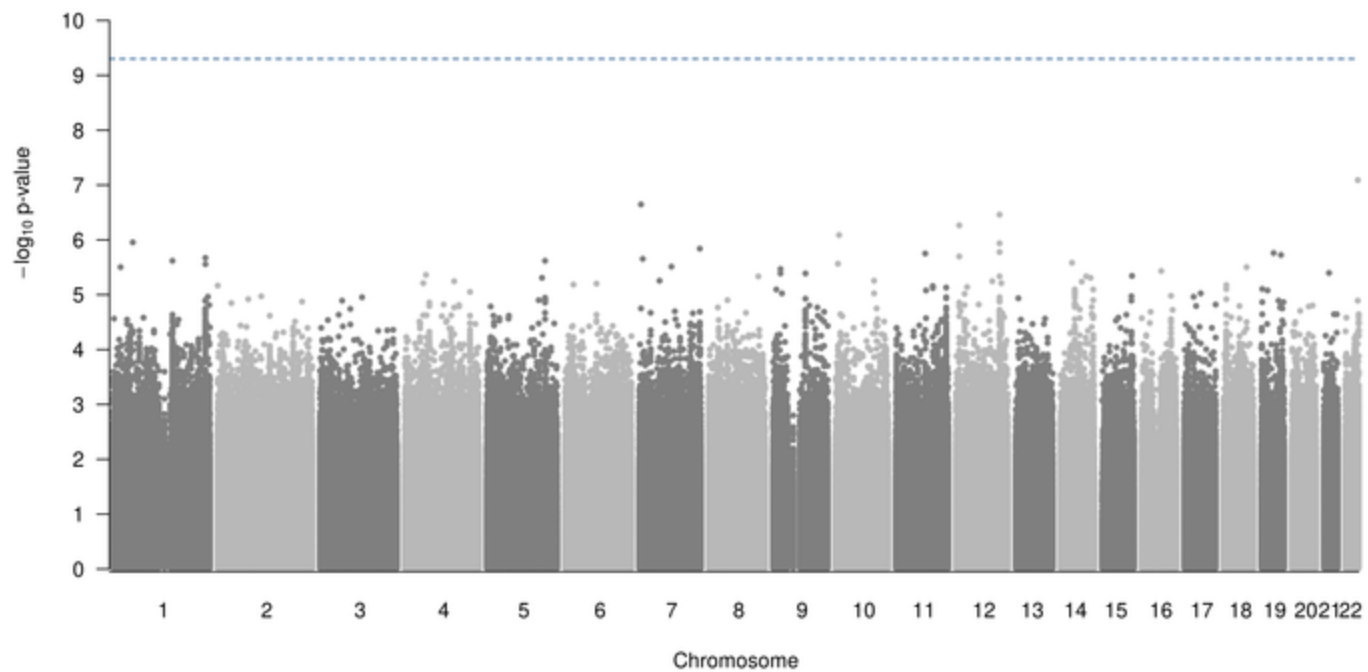

IL-24 (IL24)

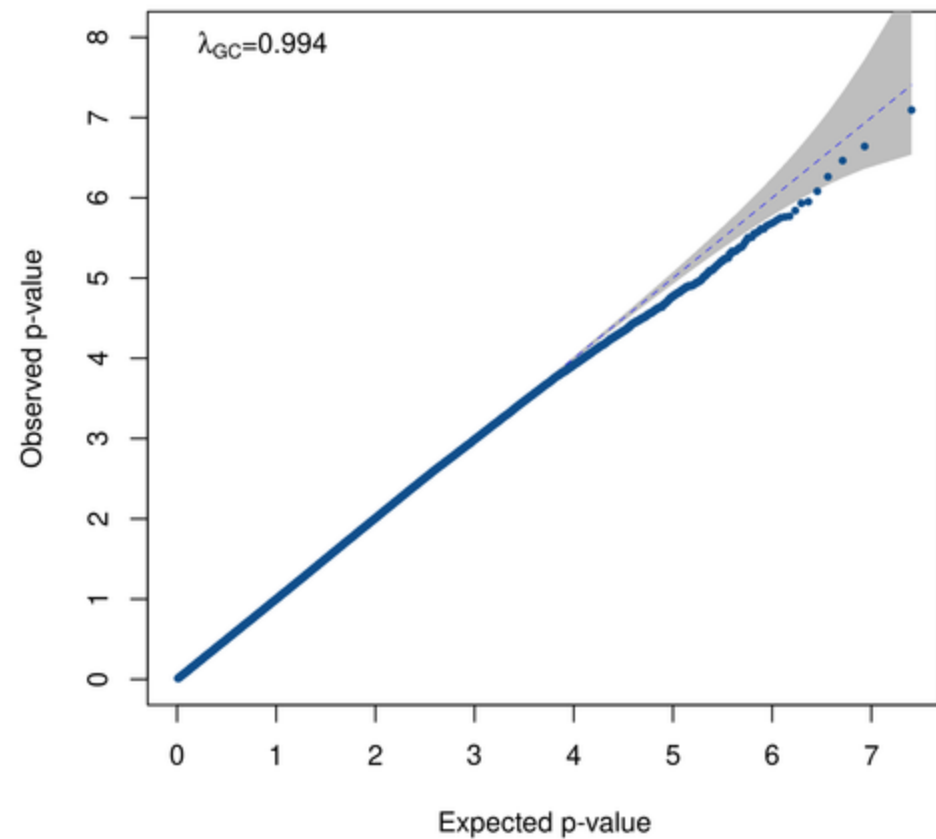

IL-2 (IL2)

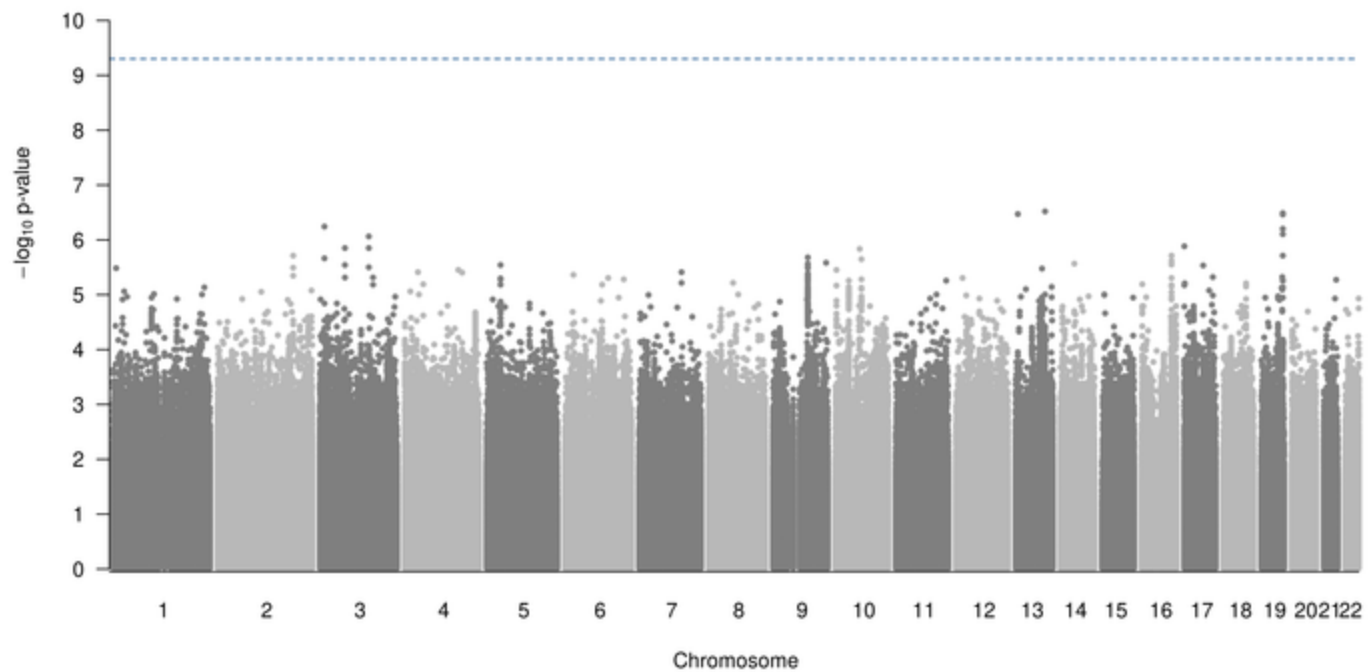

IL-2 (IL2)

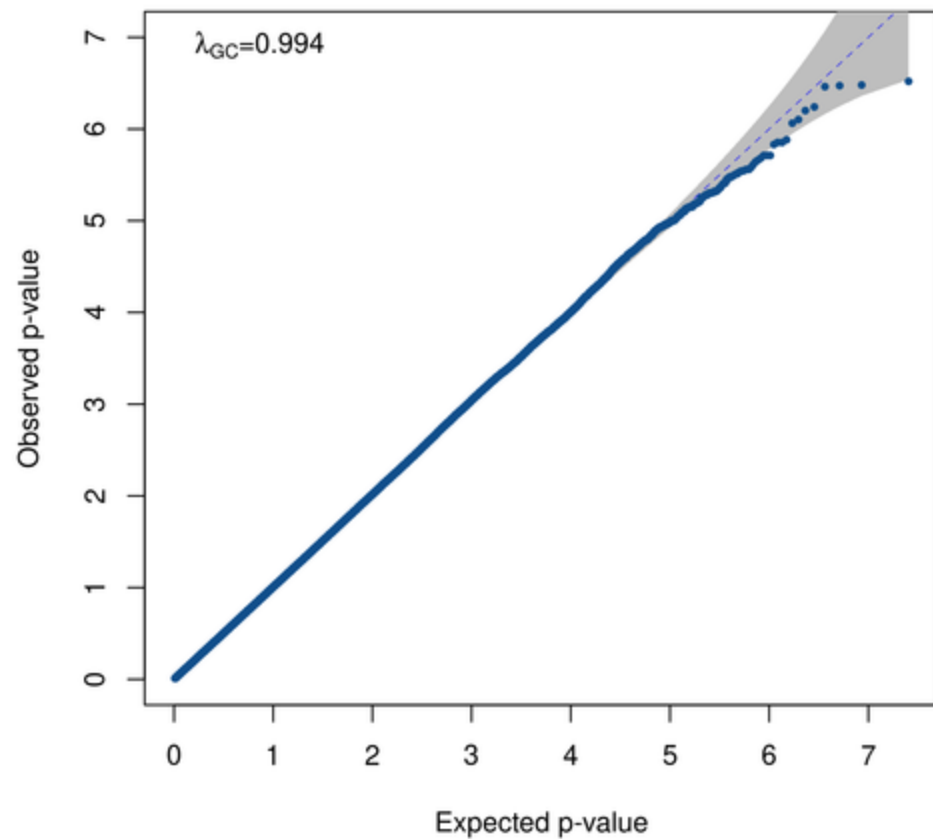

IL-2RB (IL2RB)

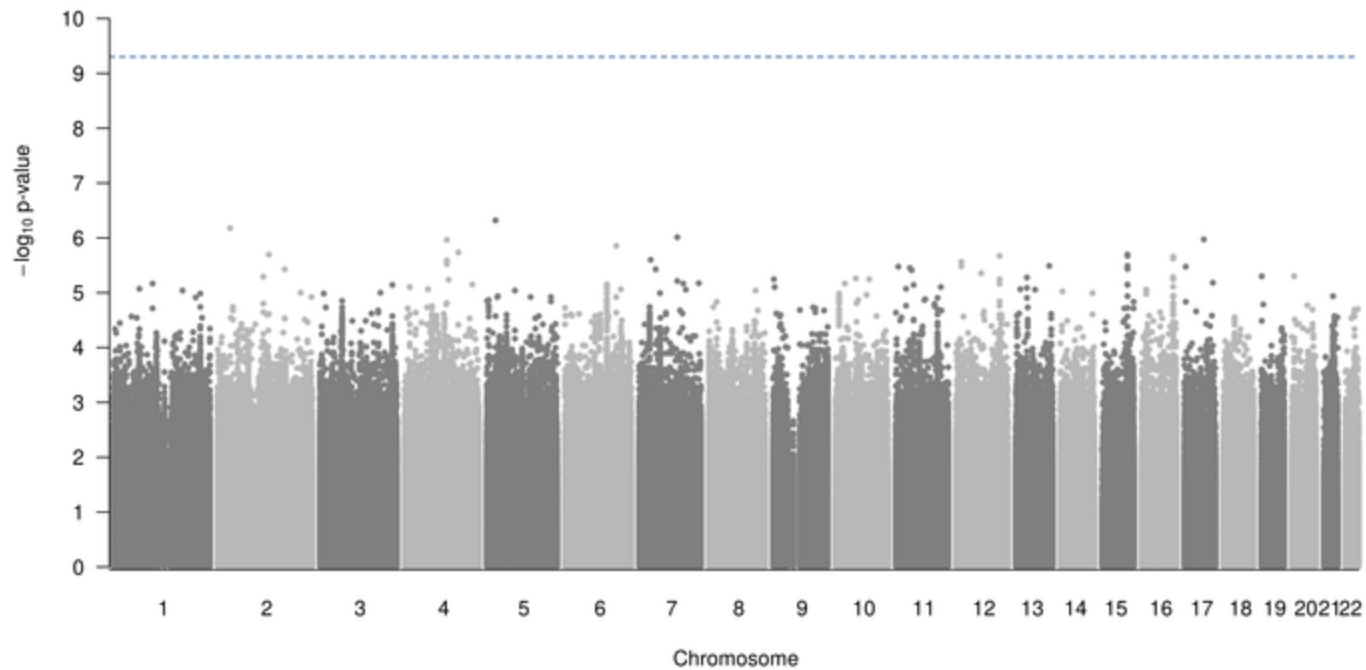

IL-2RB (IL2RB)

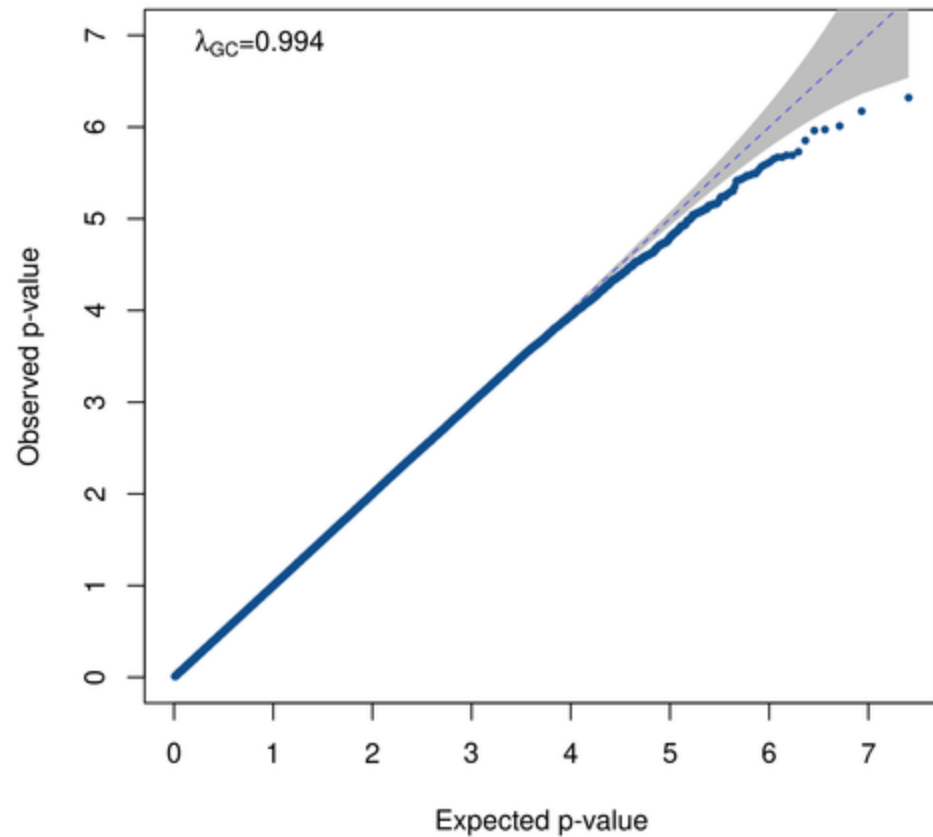

IL-33 (IL33)

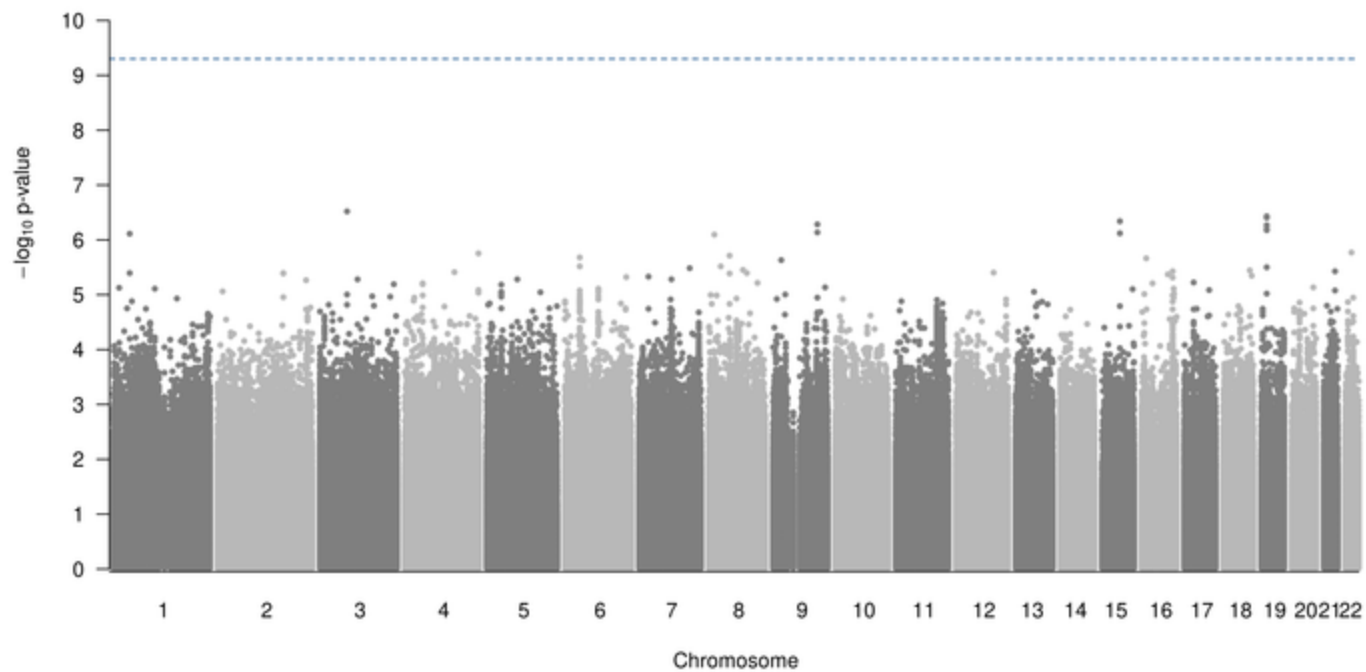

IL-33 (IL33)

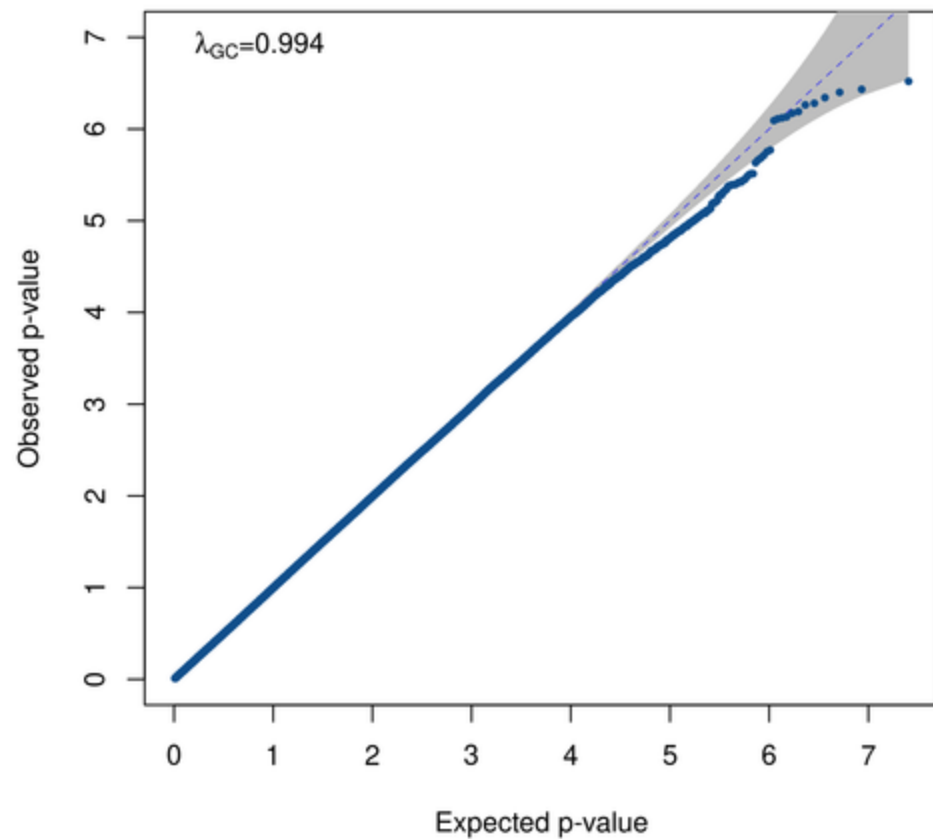

IL-4 (IL4)

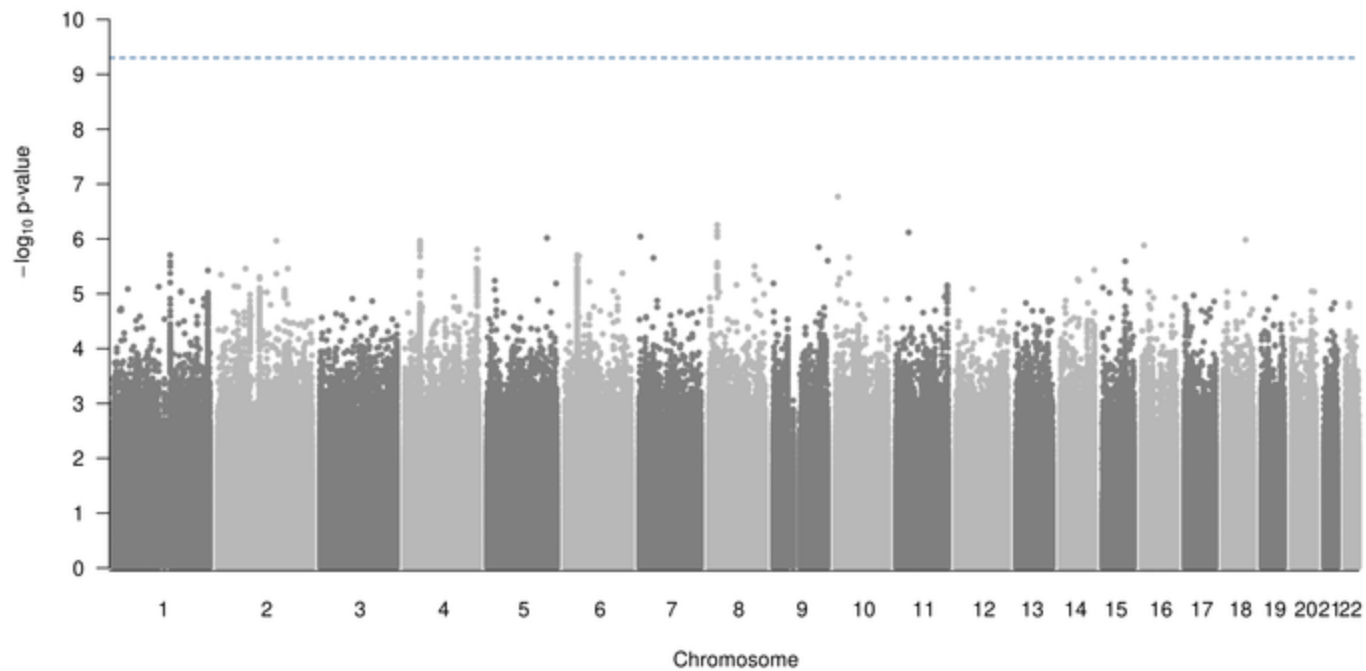

IL-4 (IL4)

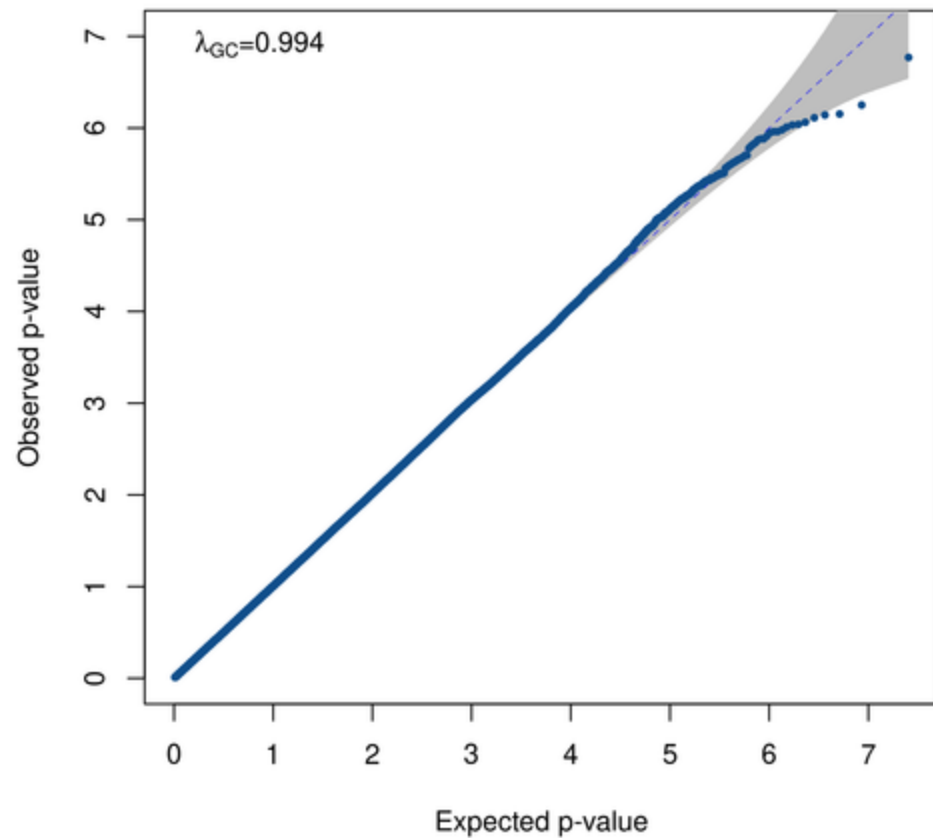



IL-5 (IL5)

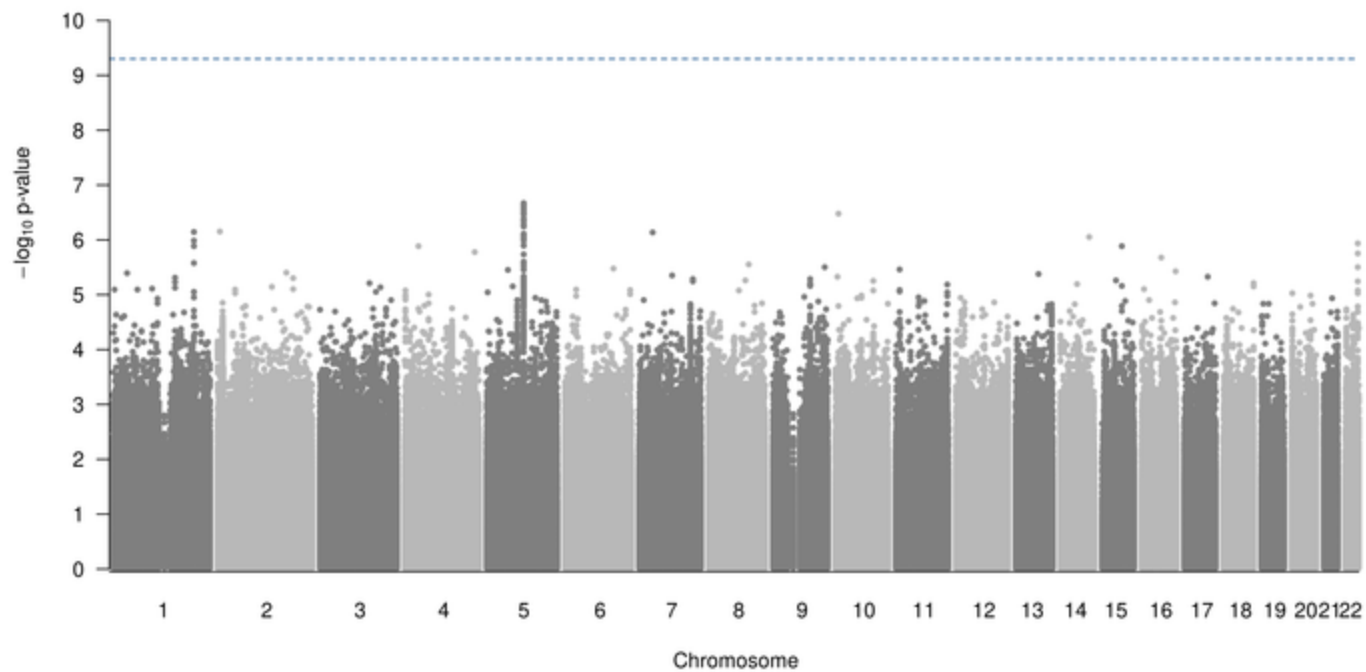

IL-5 (IL5)

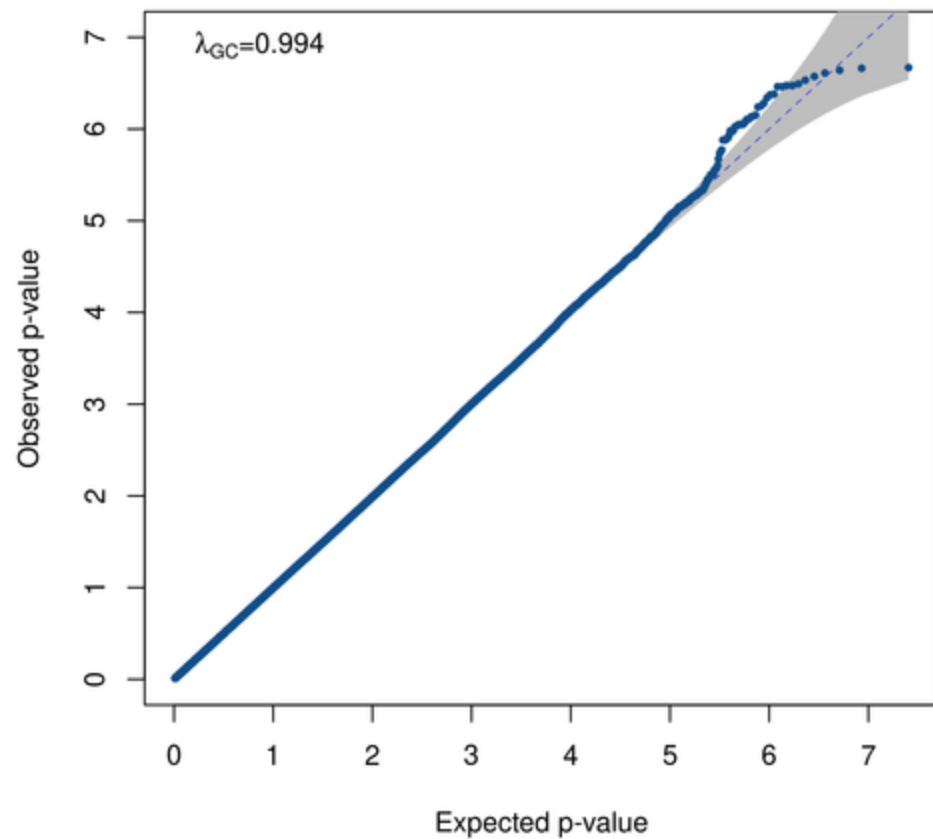

IL-6 (IL6)

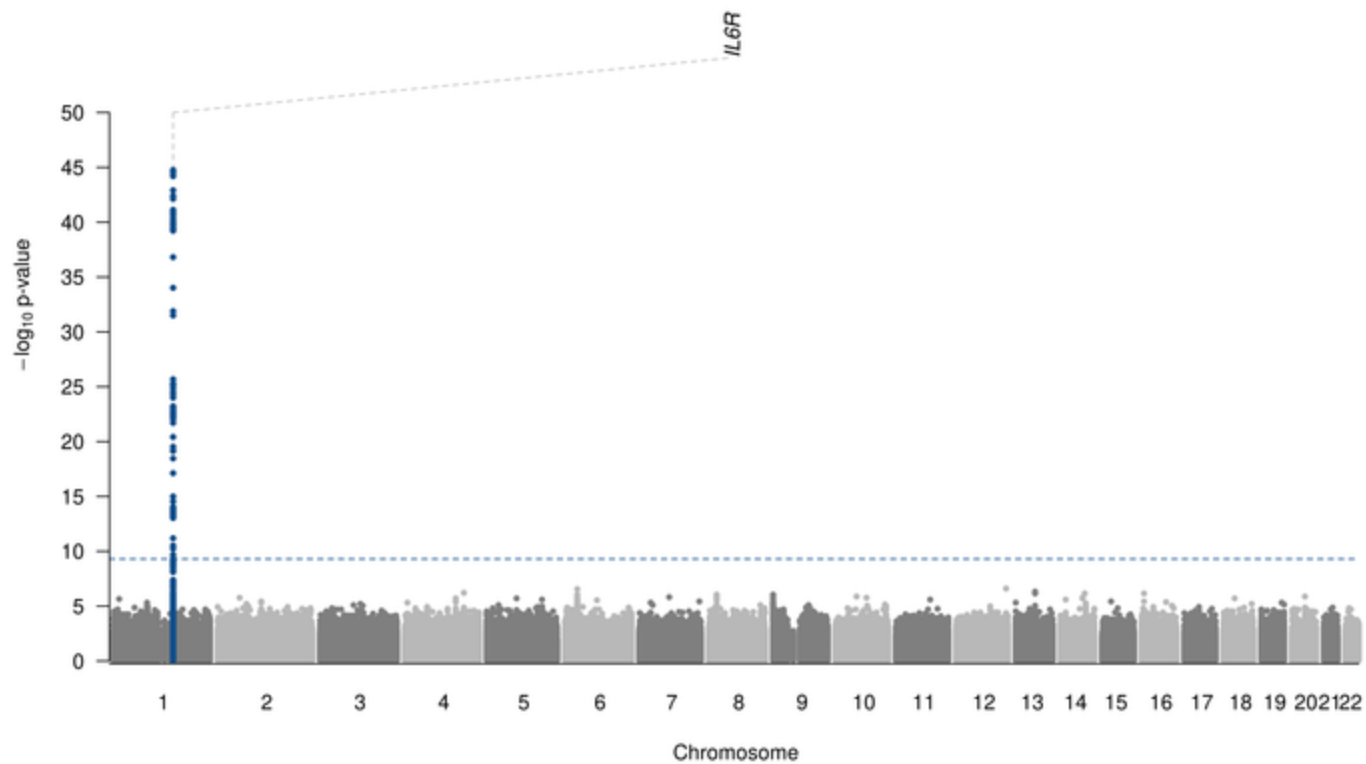

IL-6 (IL6)

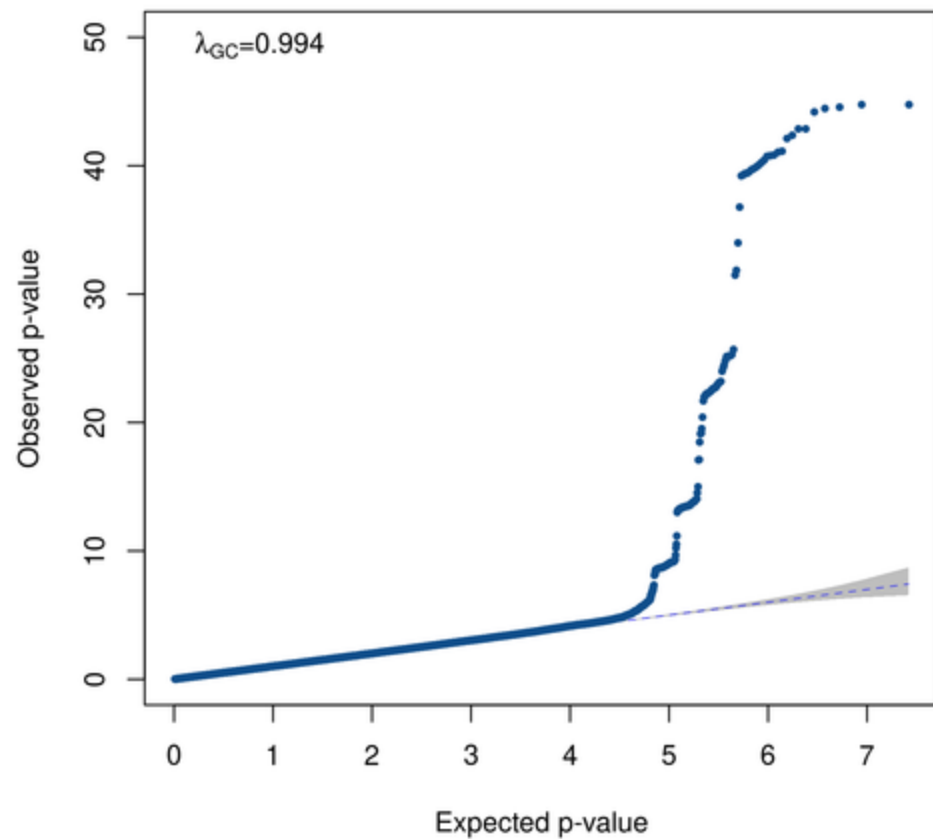

IL-7 (IL7)

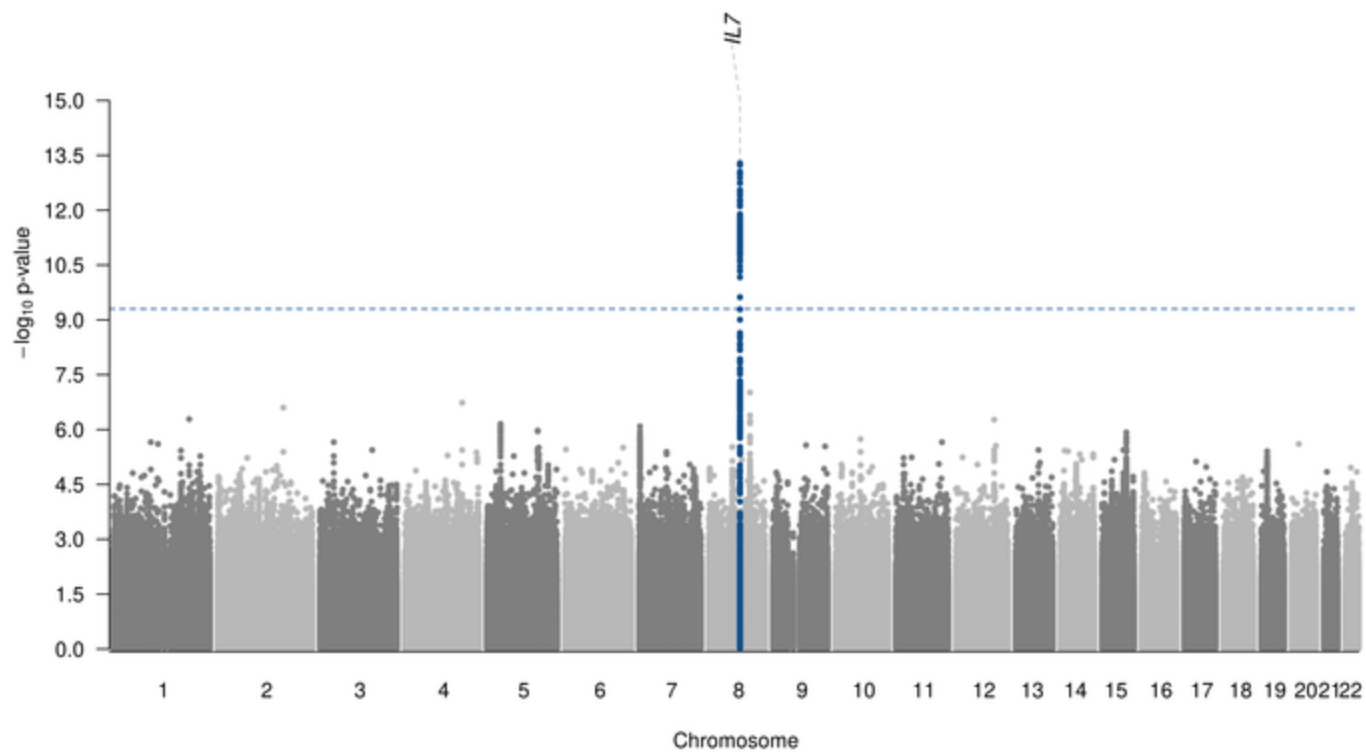

IL-7 (IL7)

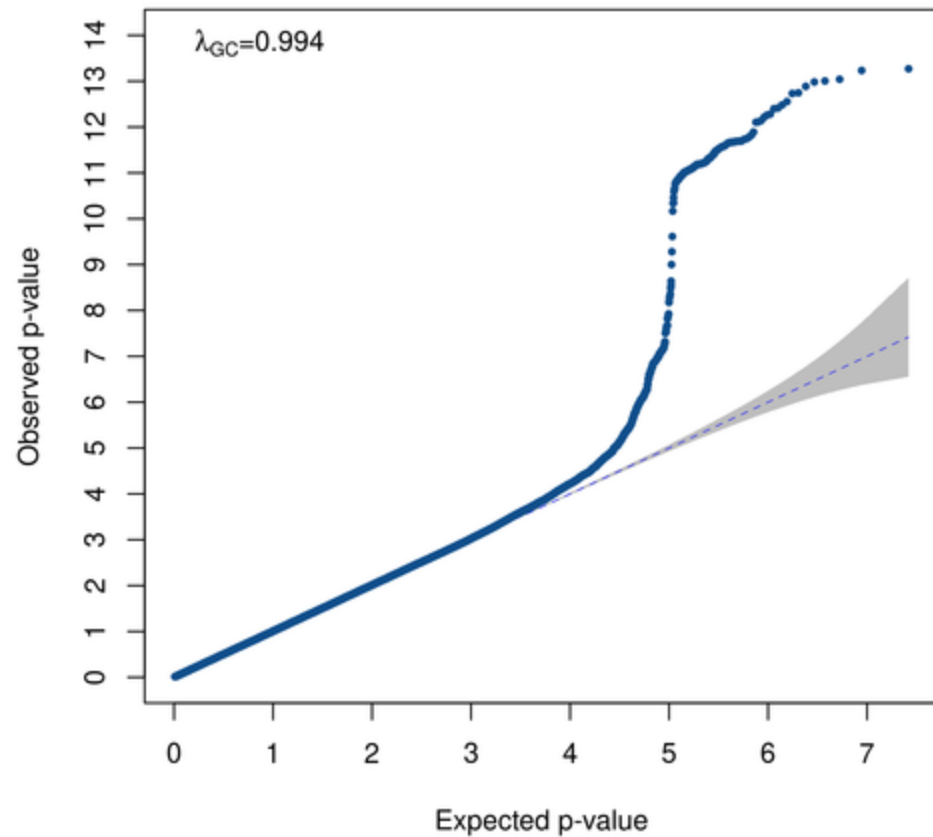

IL-8 (IL8)

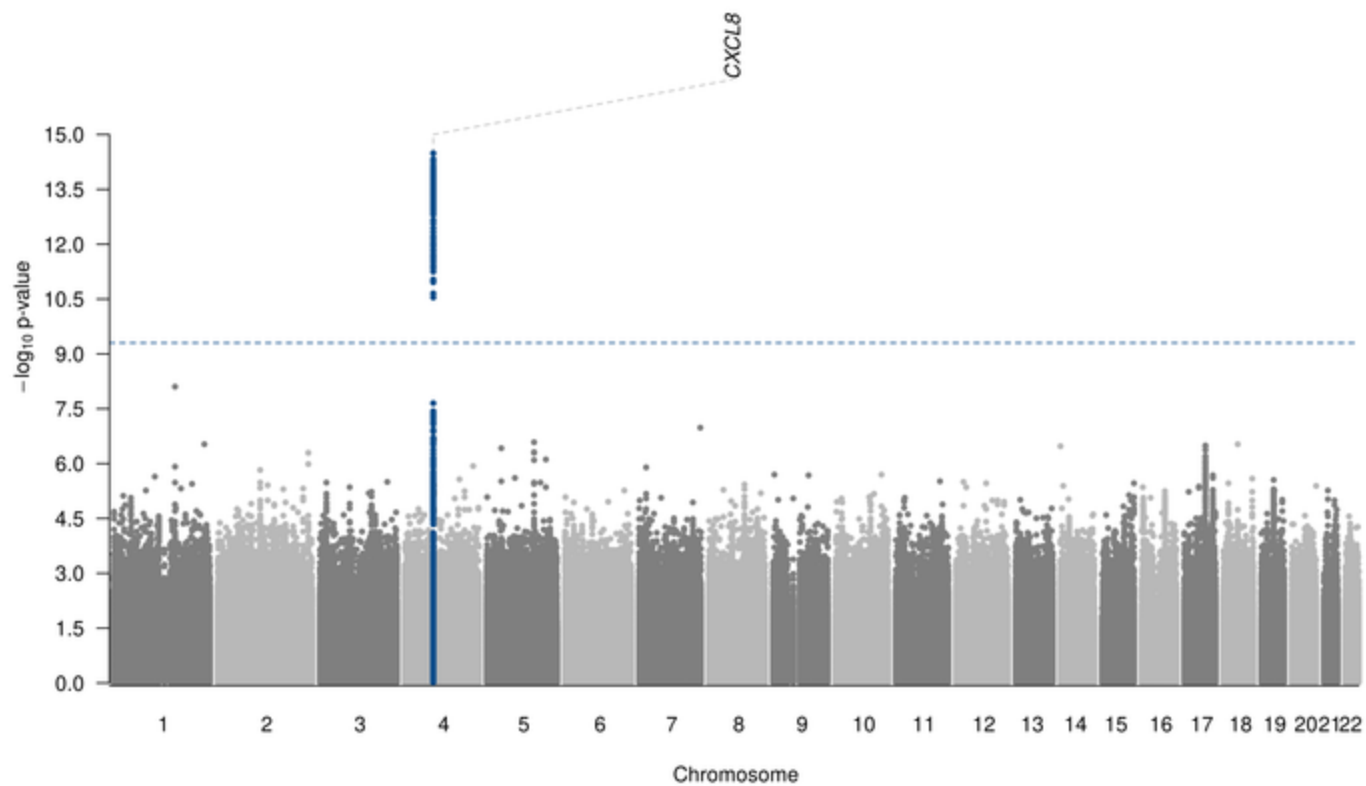

IL-8 (IL8)

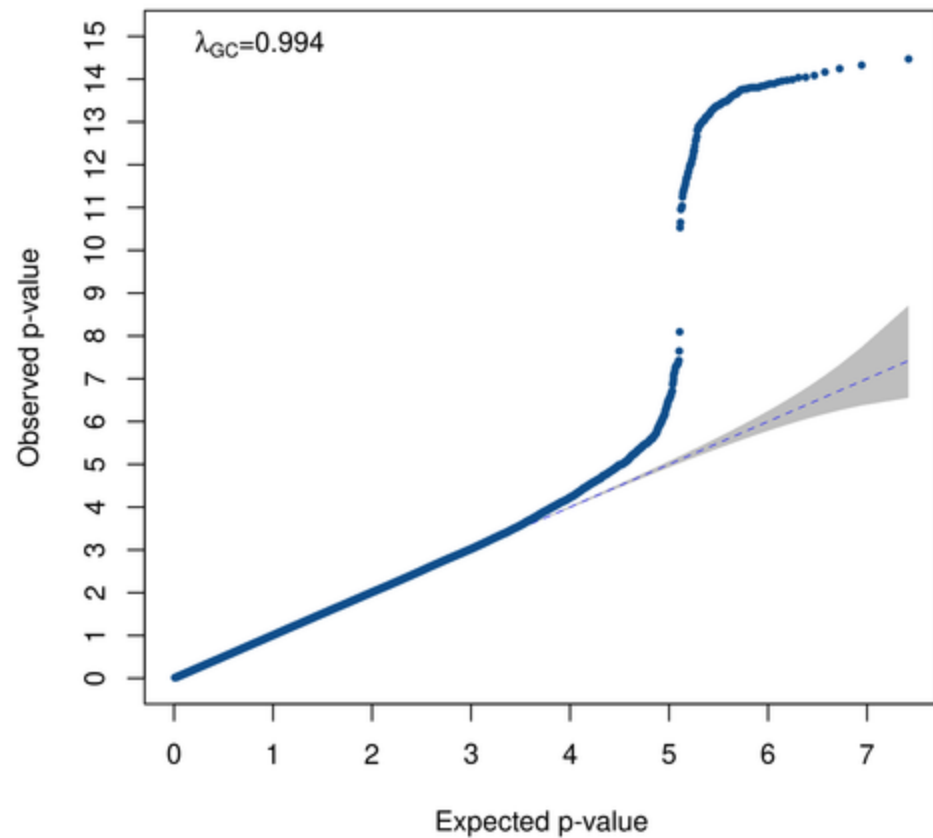

LAP (TGFB1)

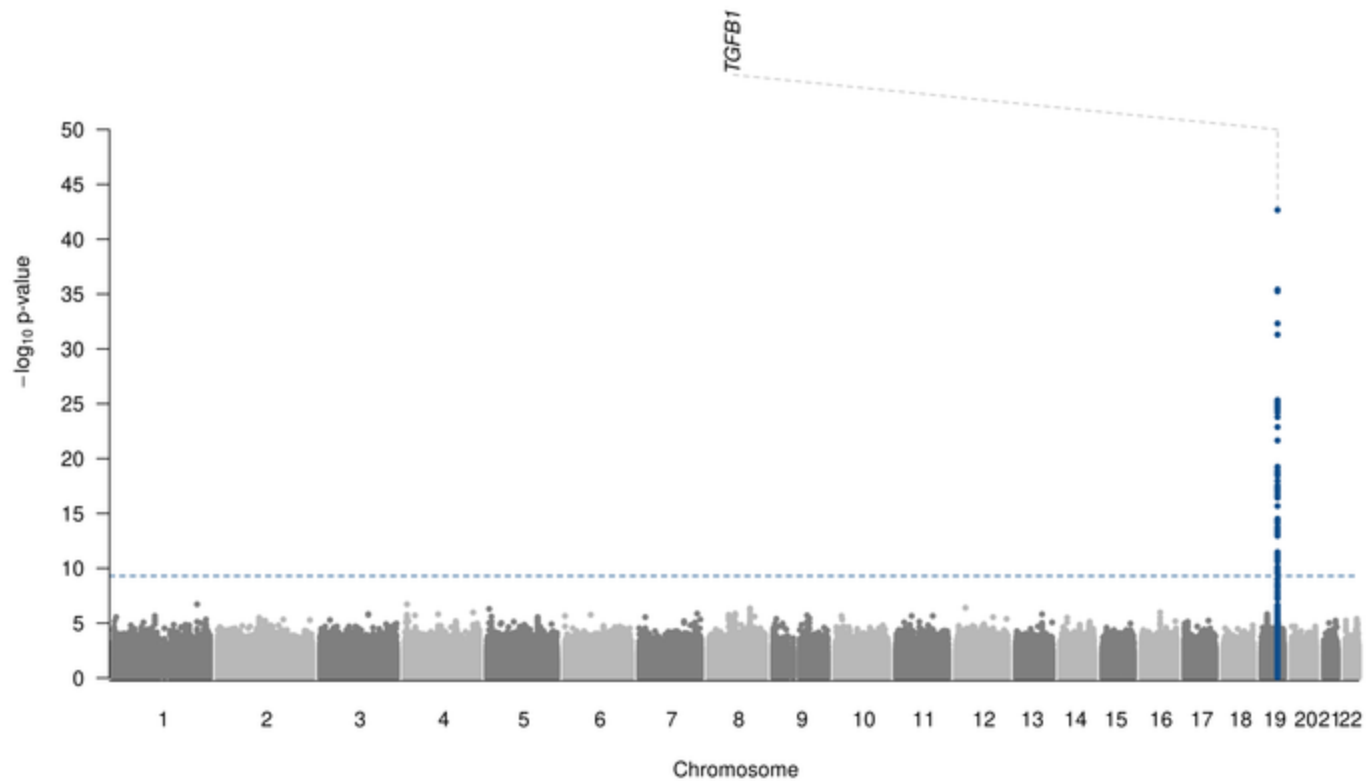

LAP (TGFB1)

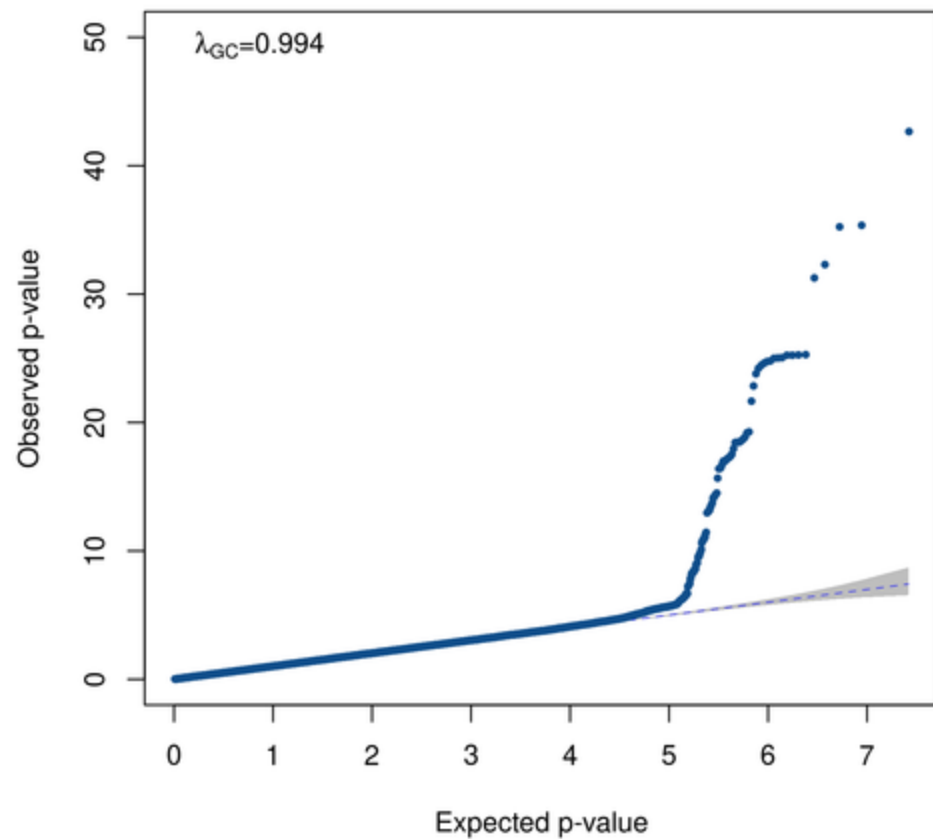

LIF (LIF)

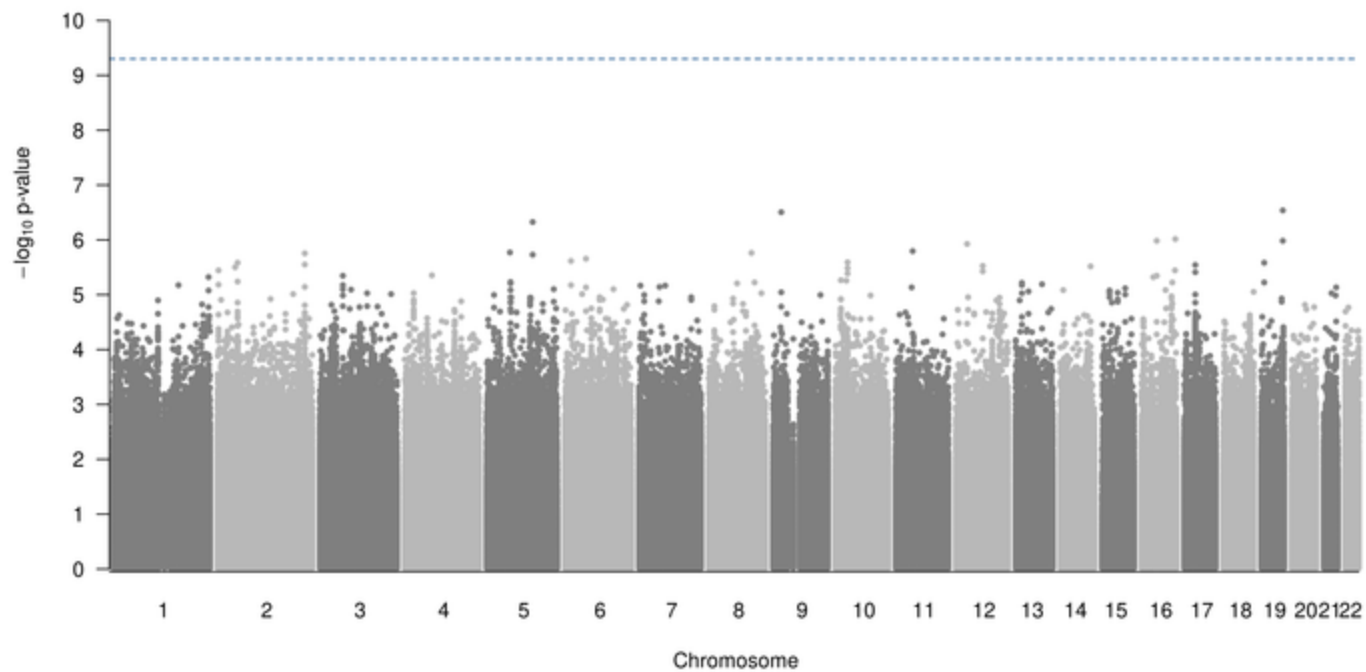

LIF (LIF)

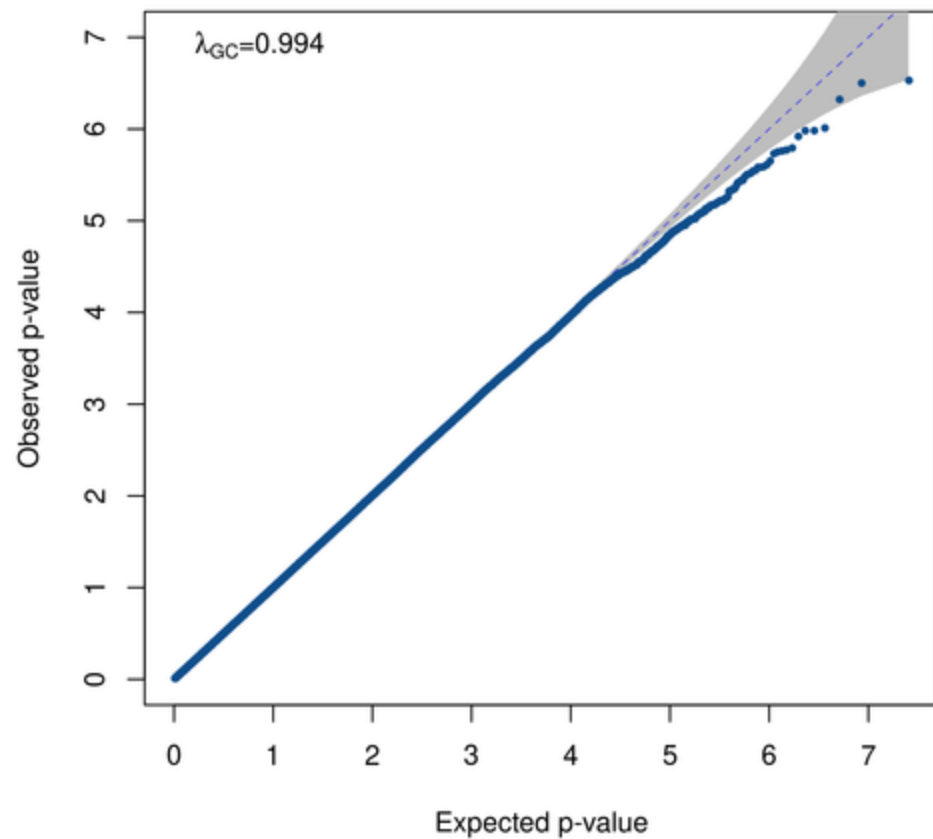

LIF-R (LIFR)

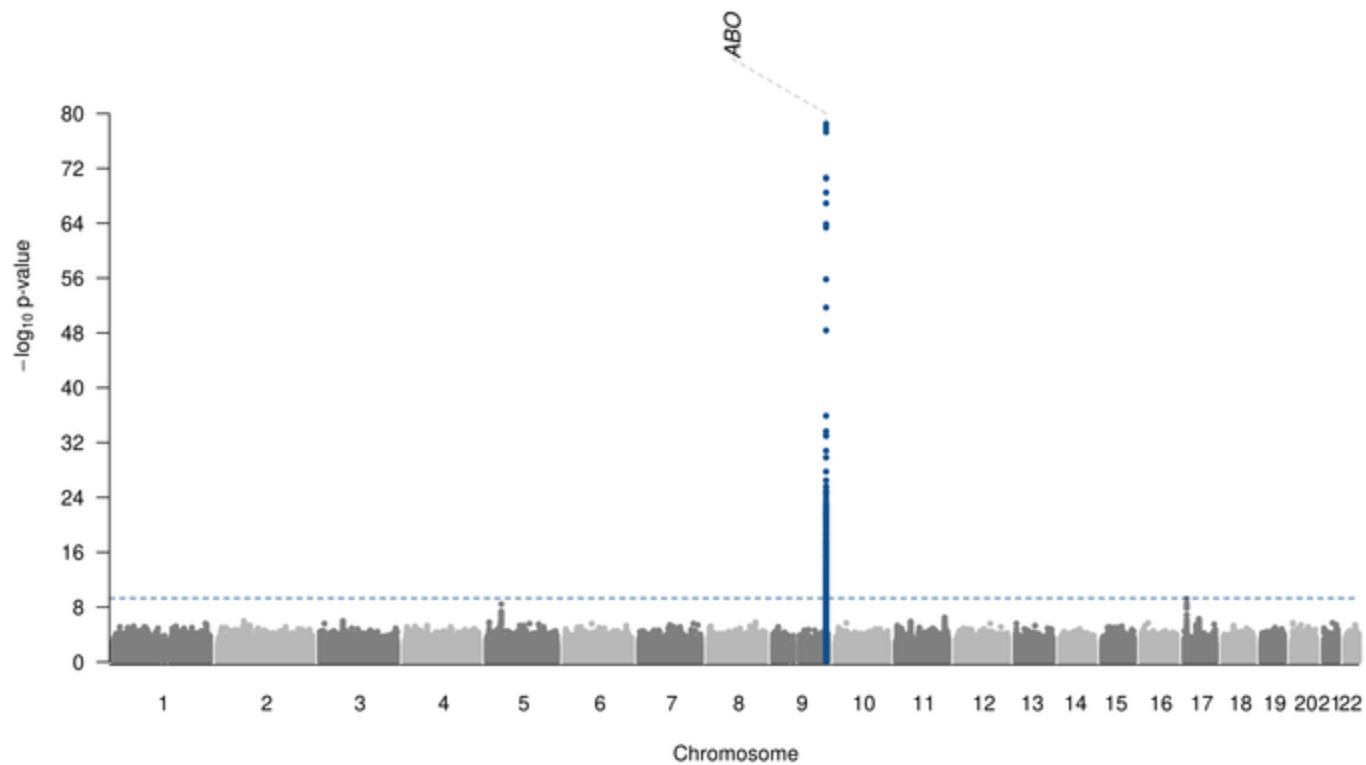

LIF-R (LIFR)

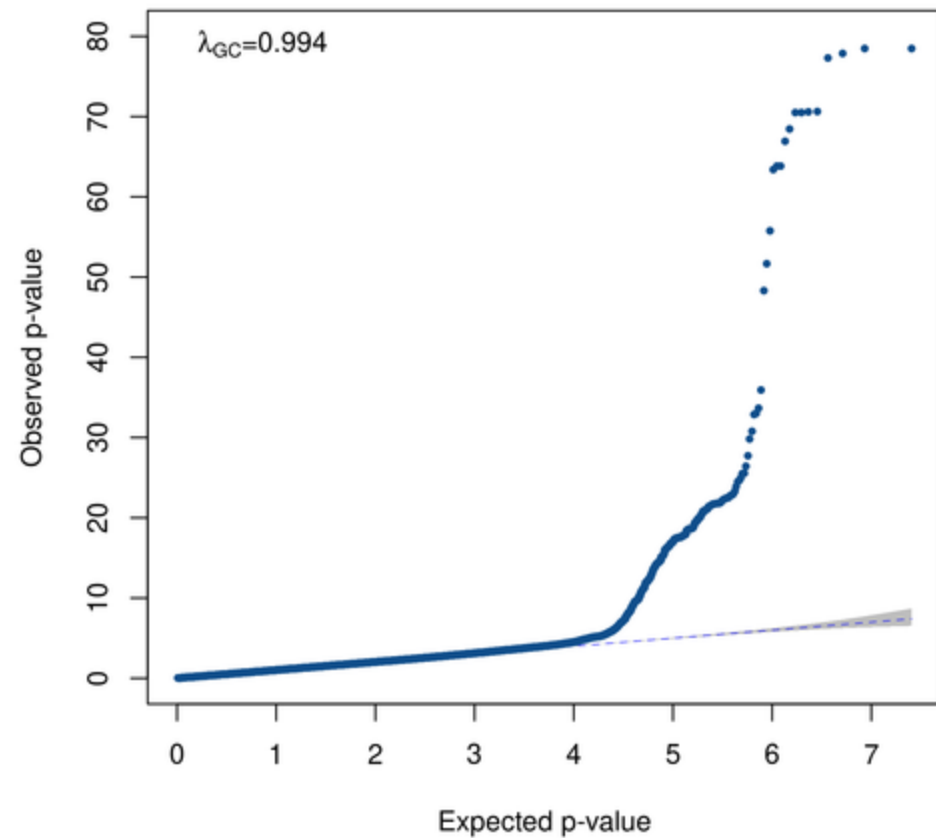

MCP-1 (CCL2)

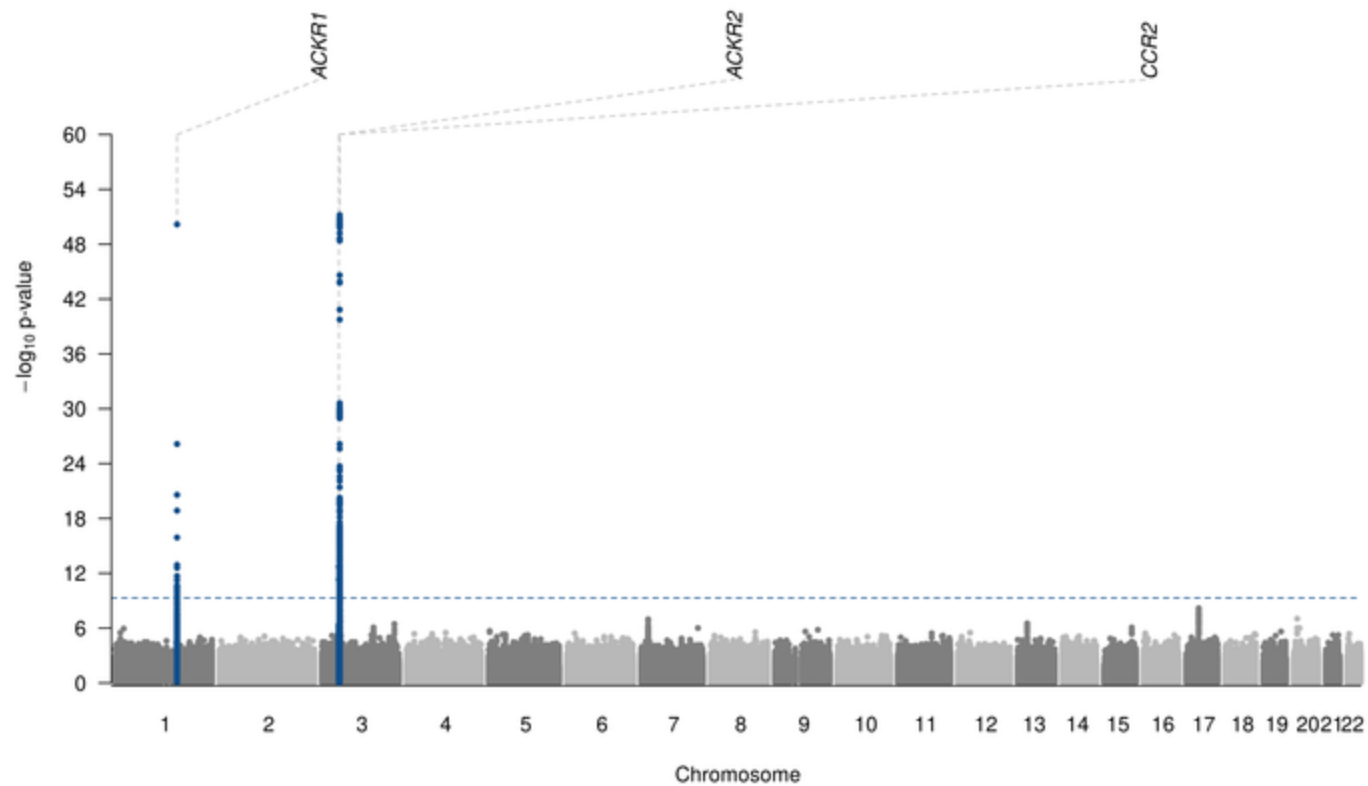

MCP-1 (CCL2)

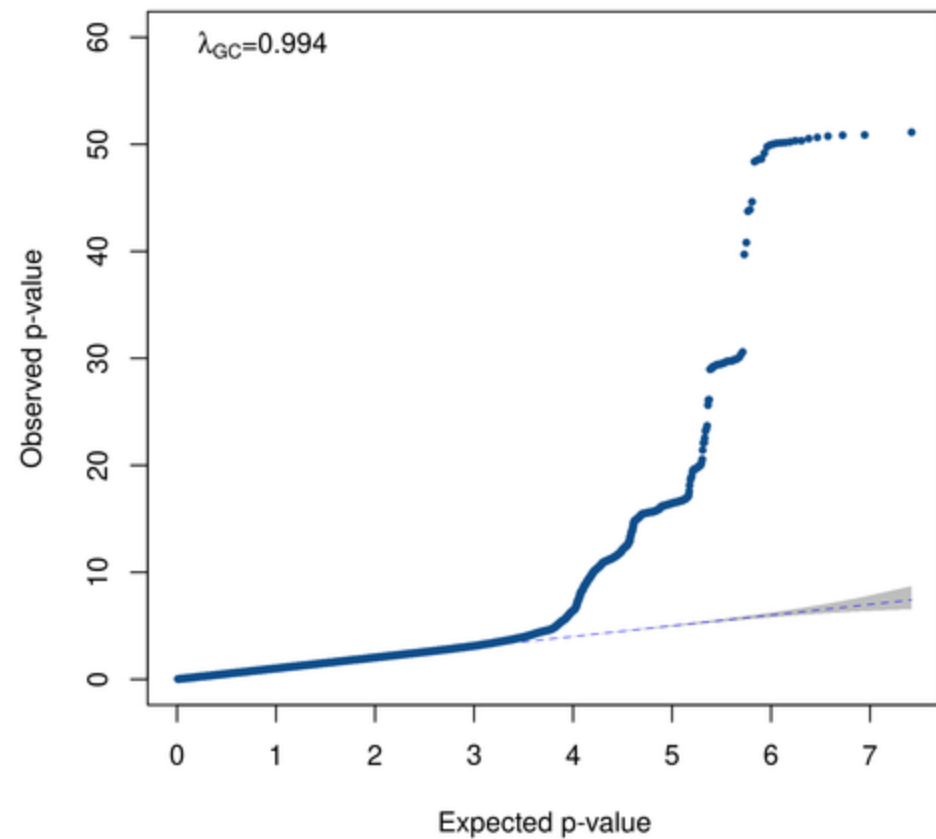



MCP-2 (CCL8)

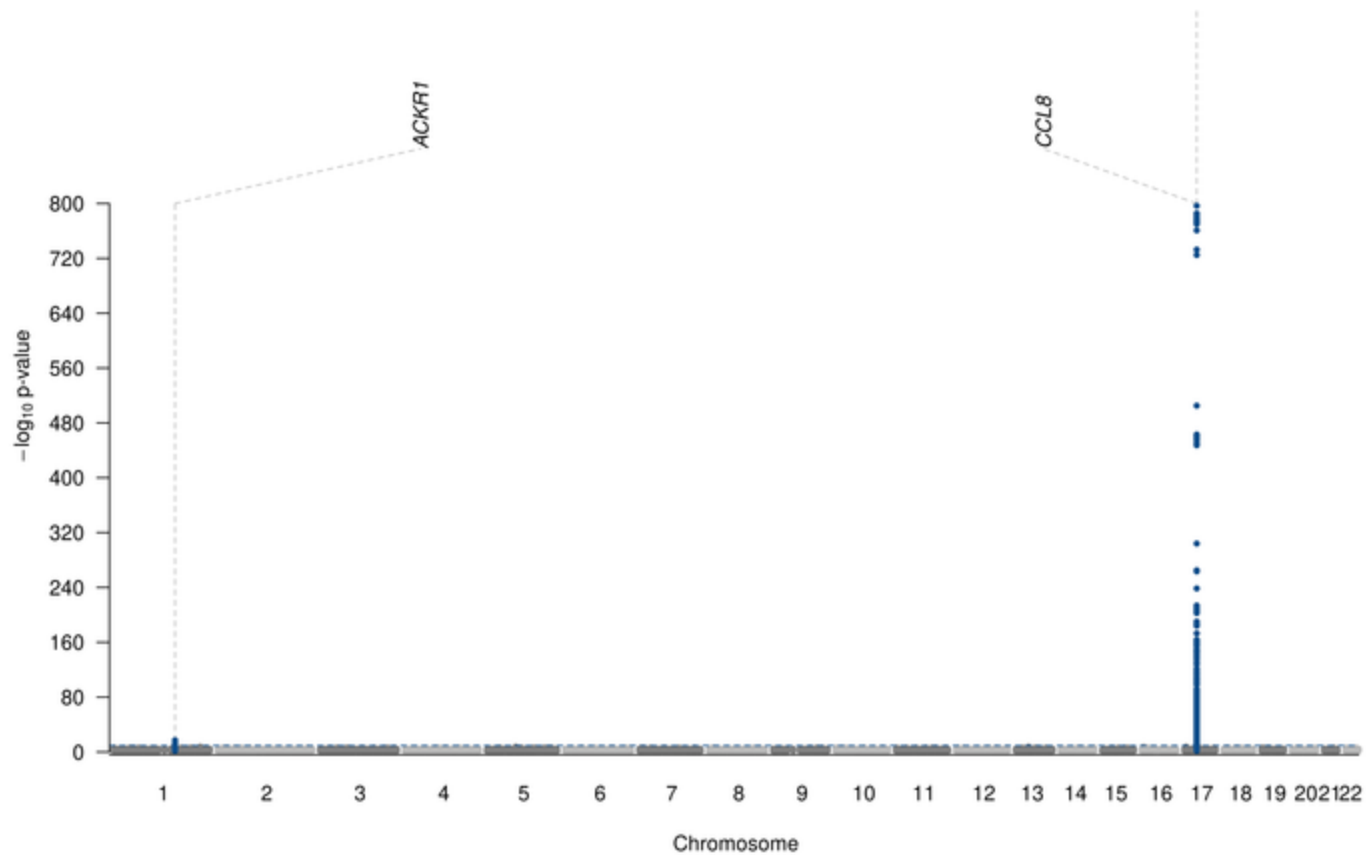

MCP-2 (CCL8)

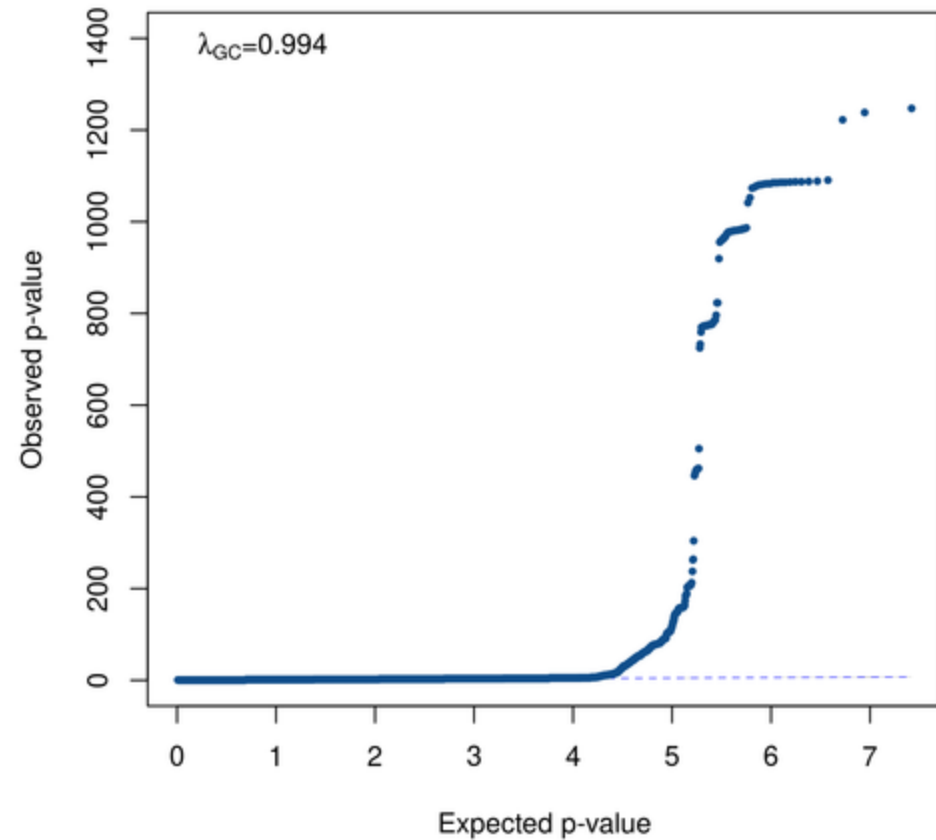

MCP-3 (CCL7)

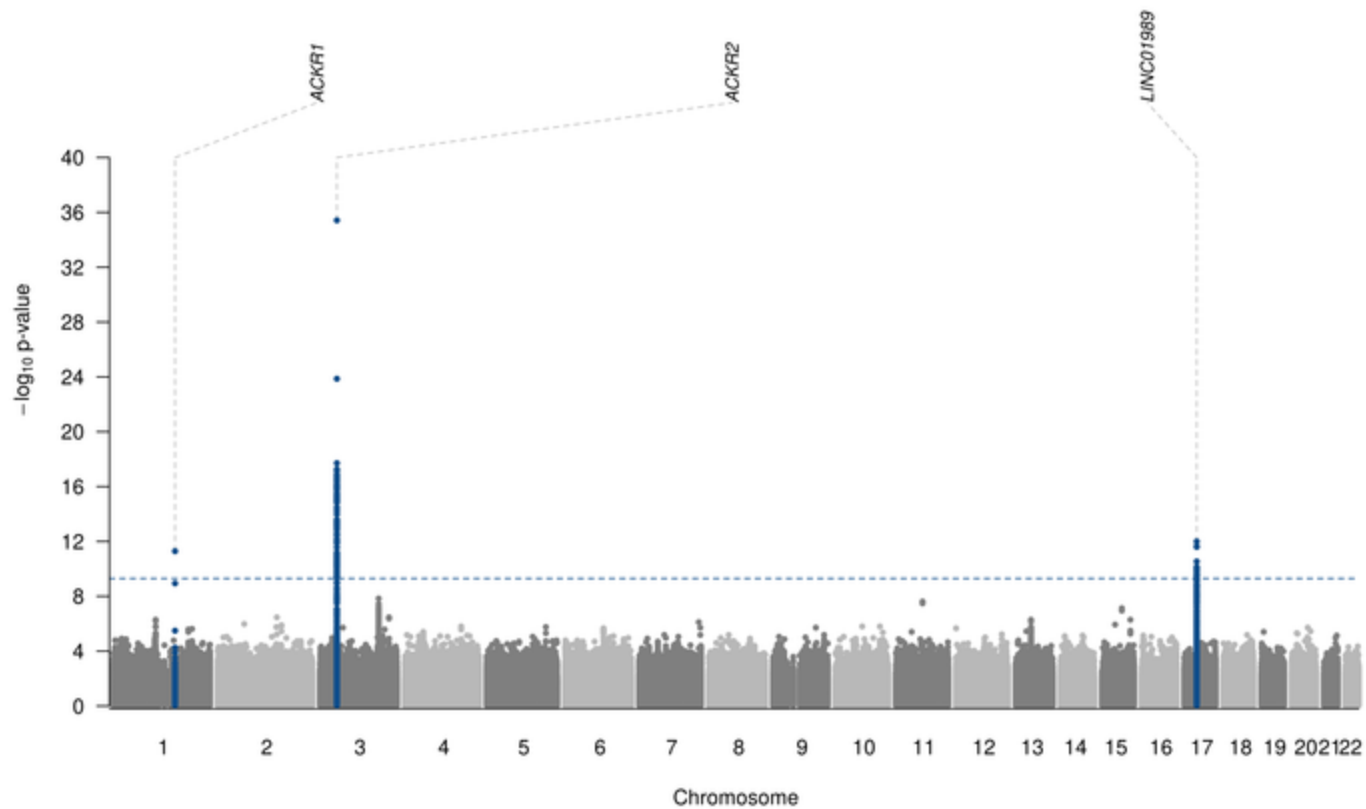

MCP-3 (CCL7)

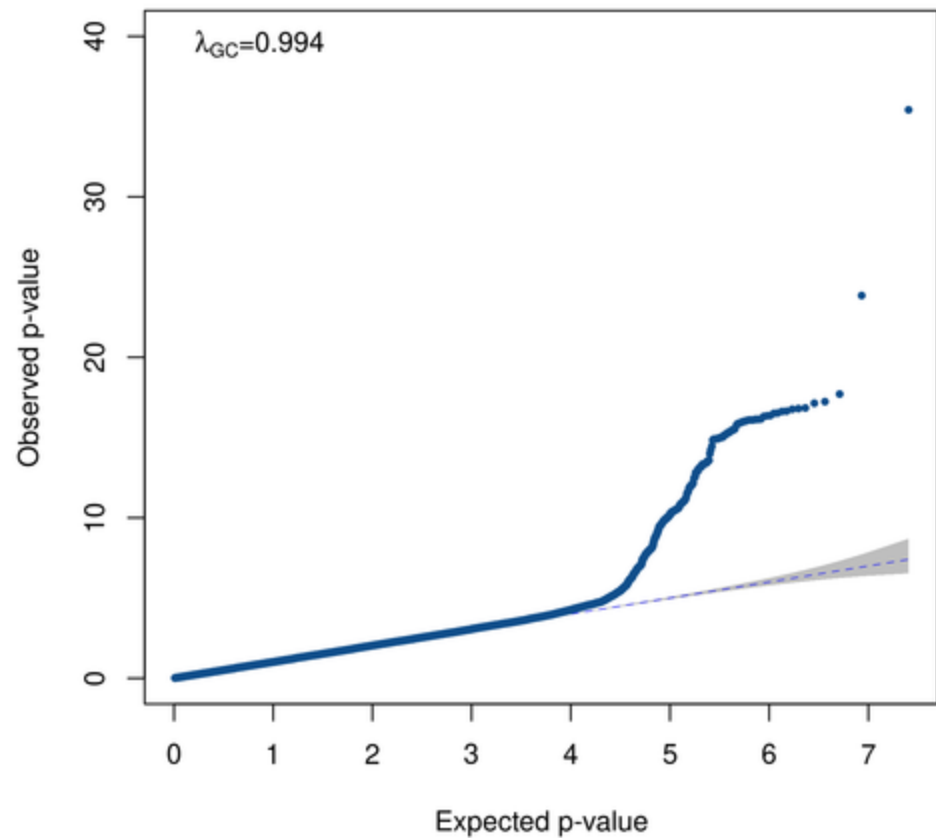

MCP-4 (CCL13)

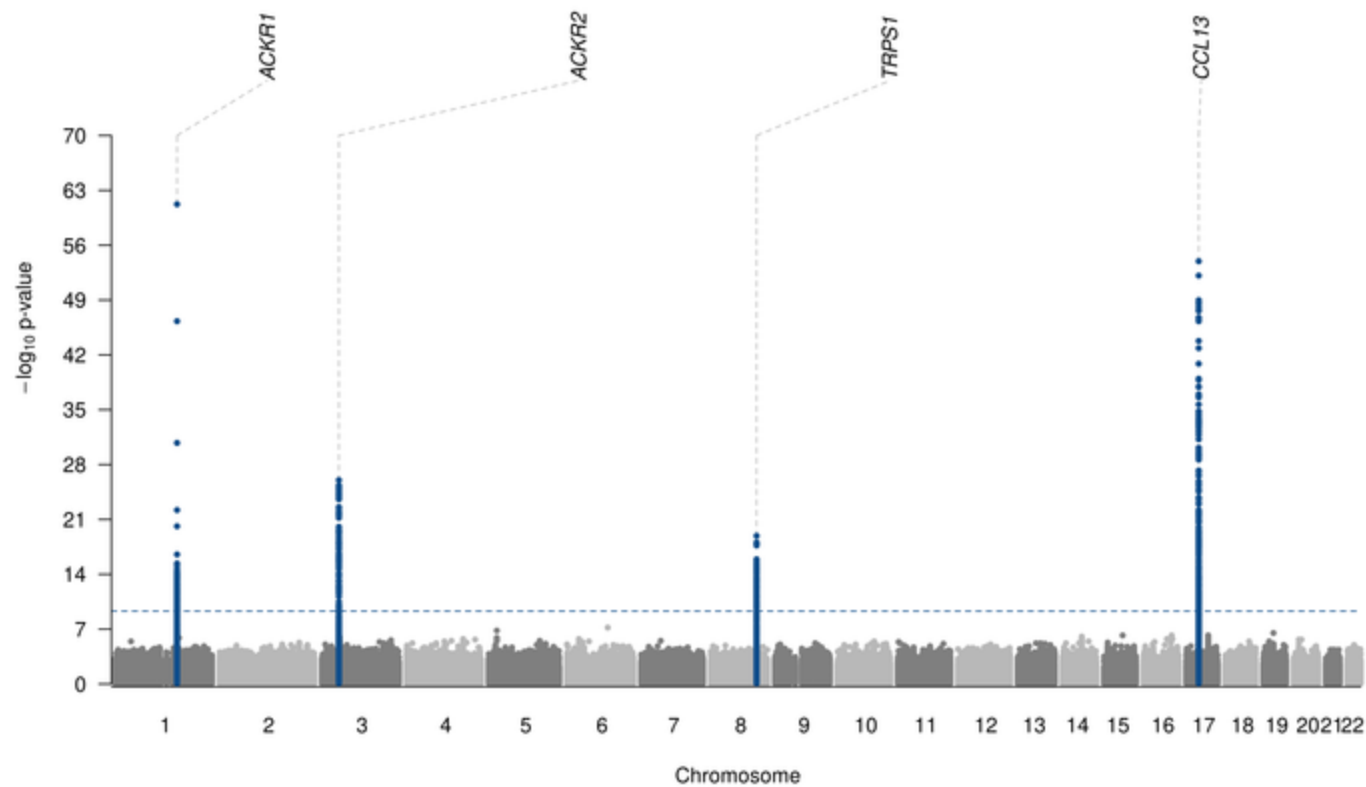

MCP-4 (CCL13)

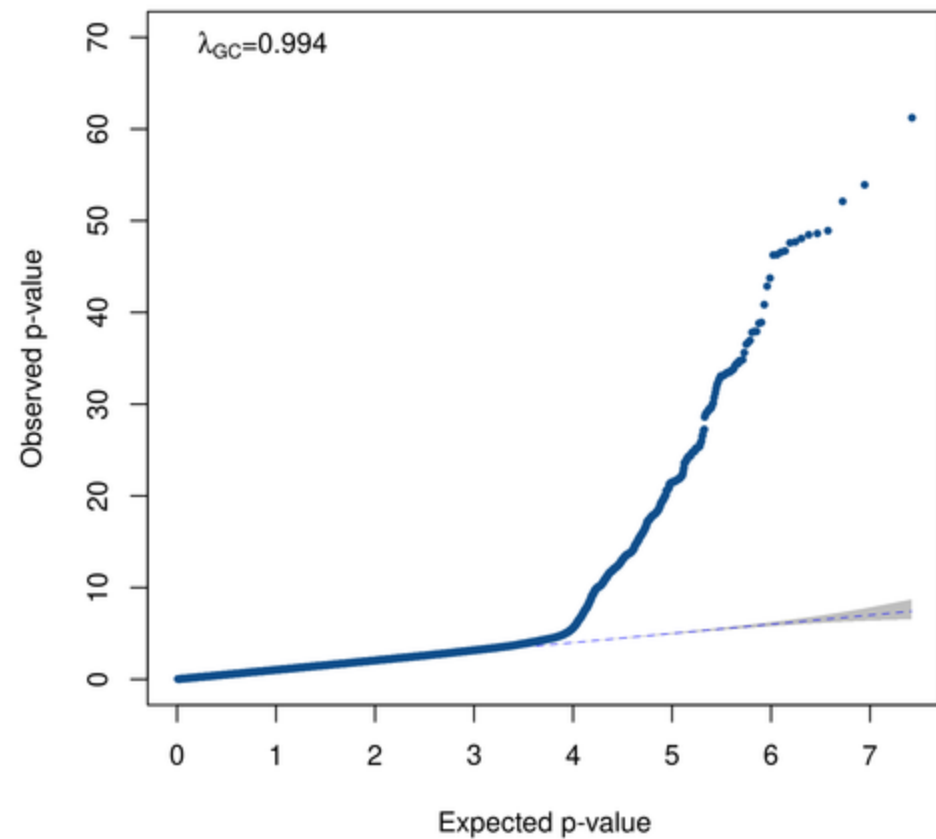

MIP-1 (CCL3)

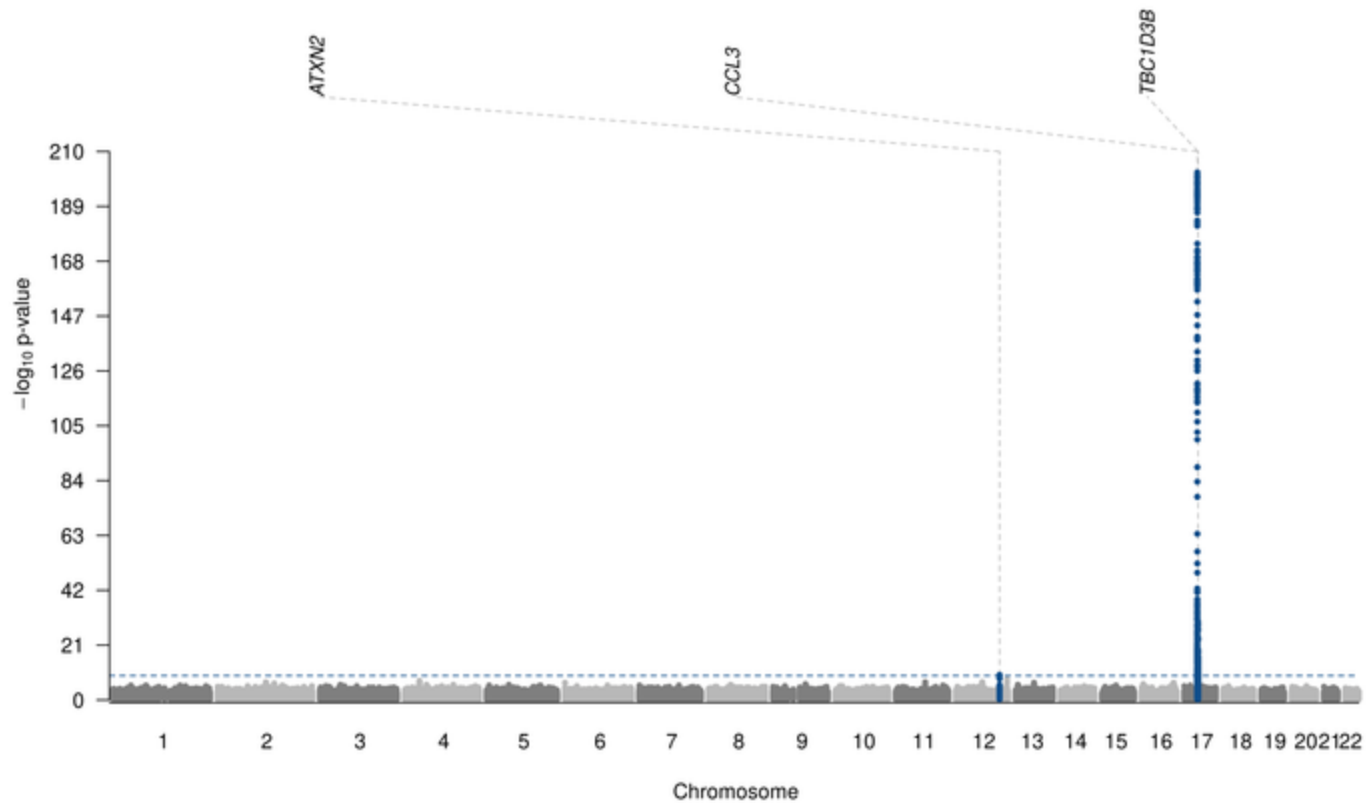

MIP-1 (CCL3)

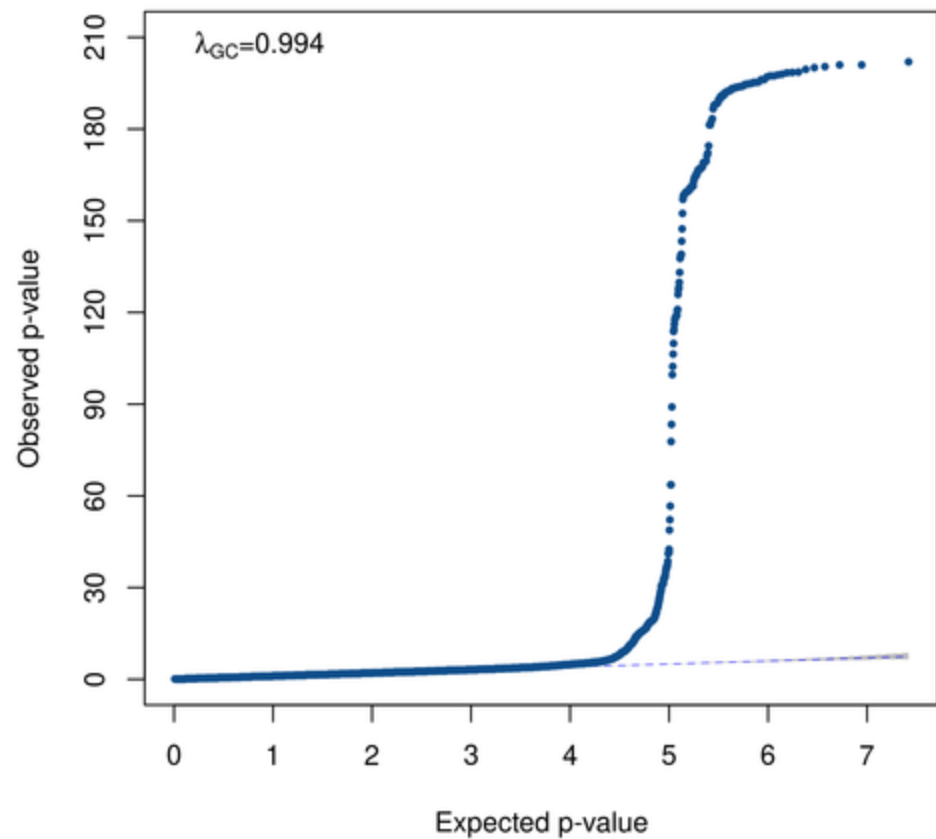

MMP-10 (MMP10)

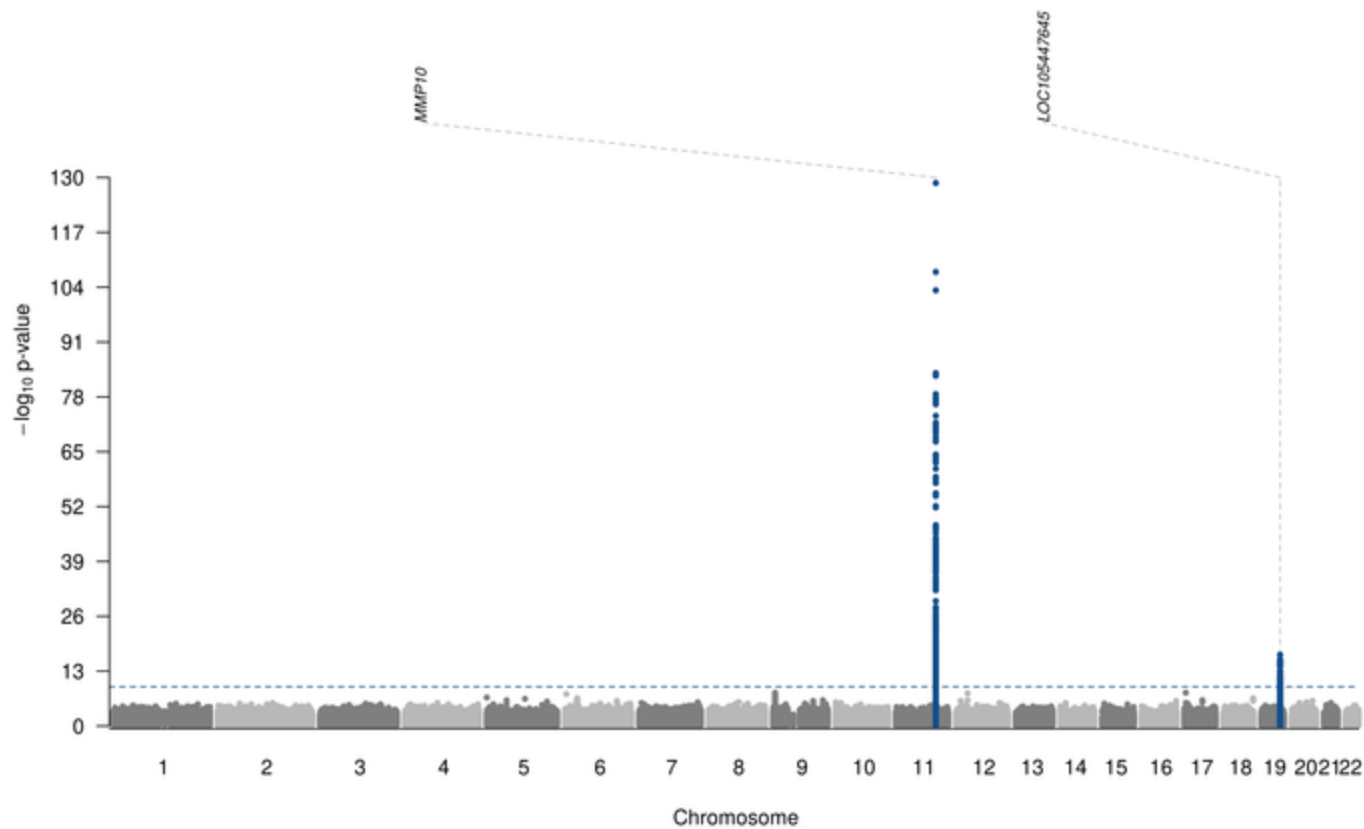

MMP-10 (MMP10)

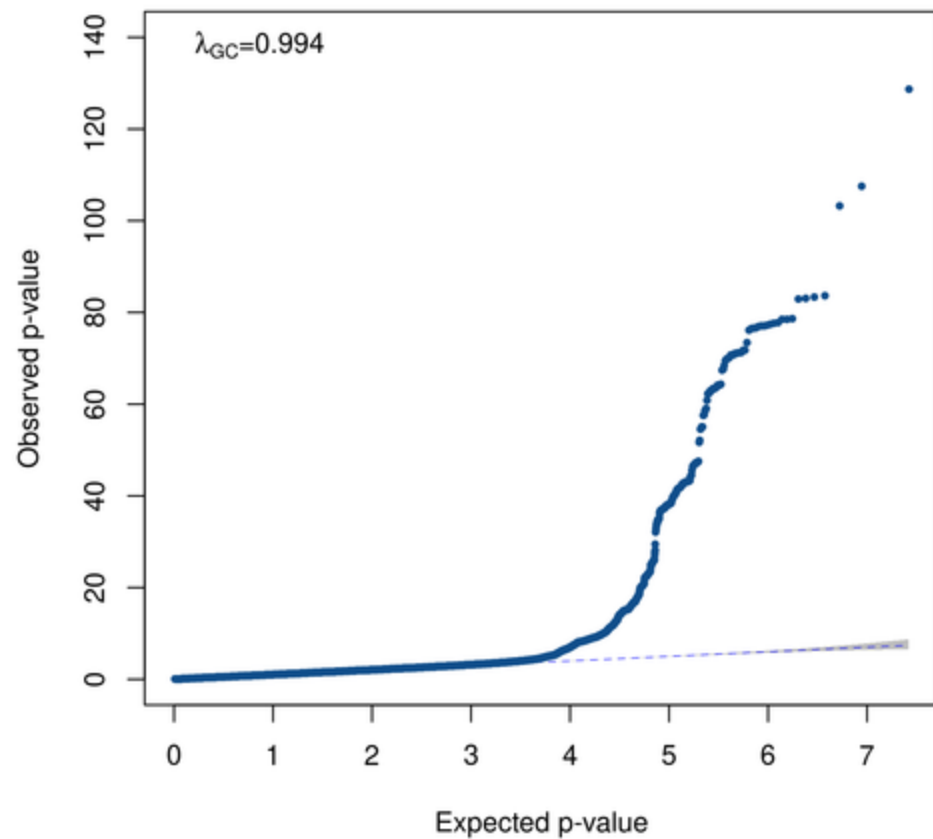

MMP-1 (MMP1)

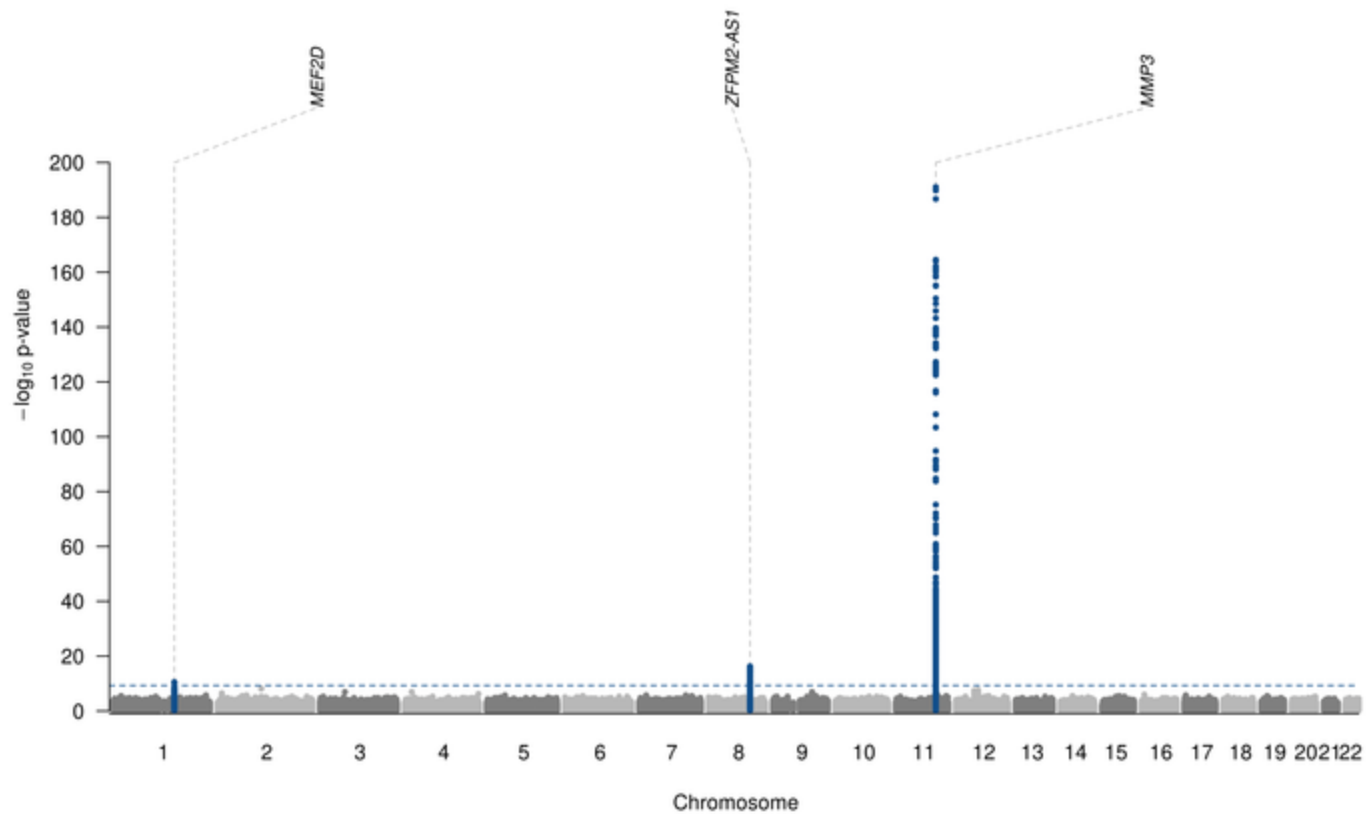

MMP-1 (MMP1)

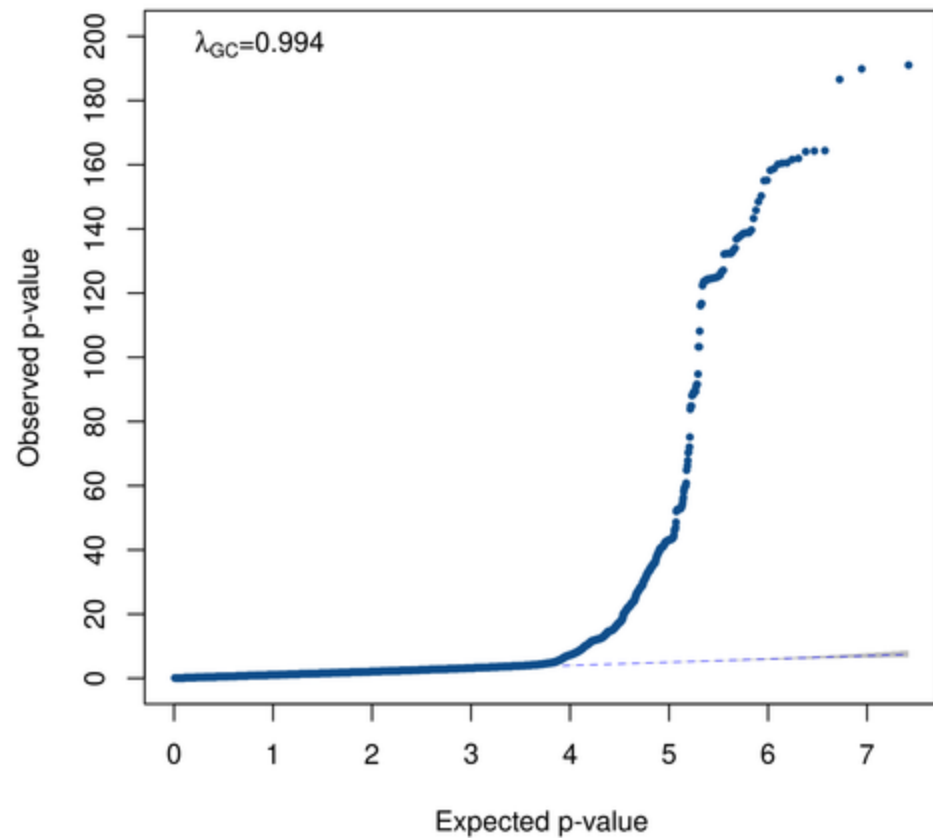

NRTN (NRTN)

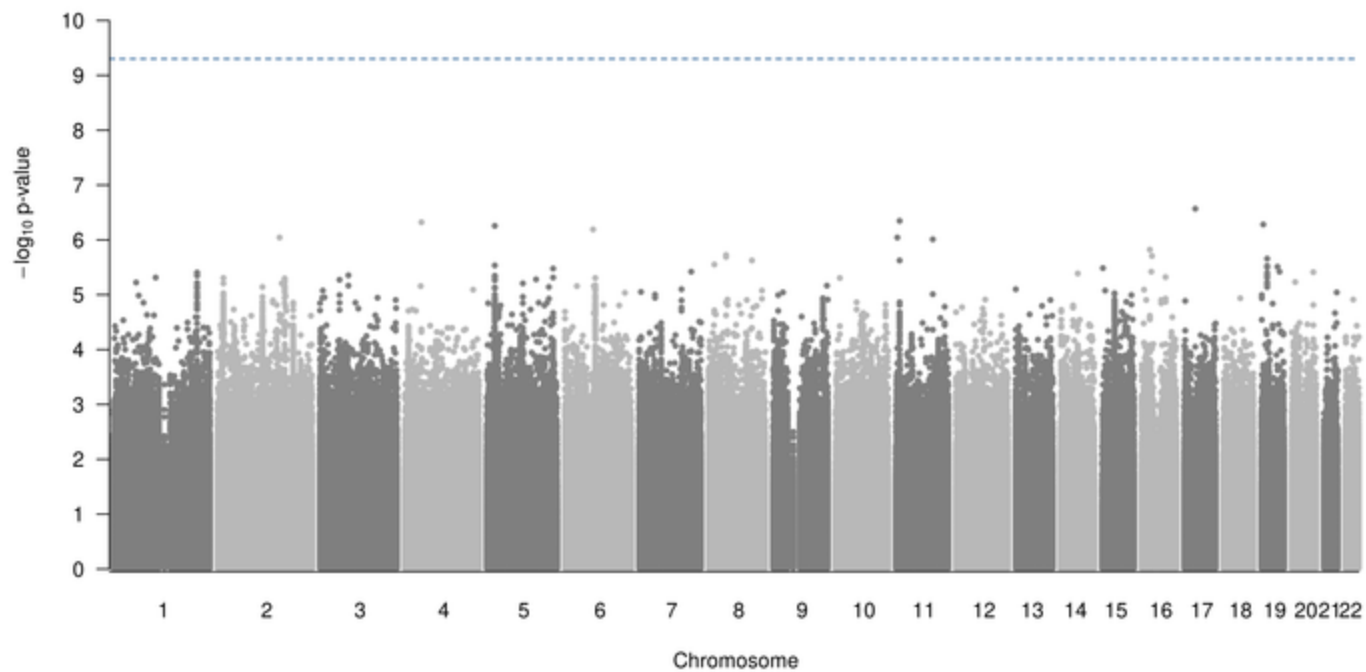

NRTN (NRTN)

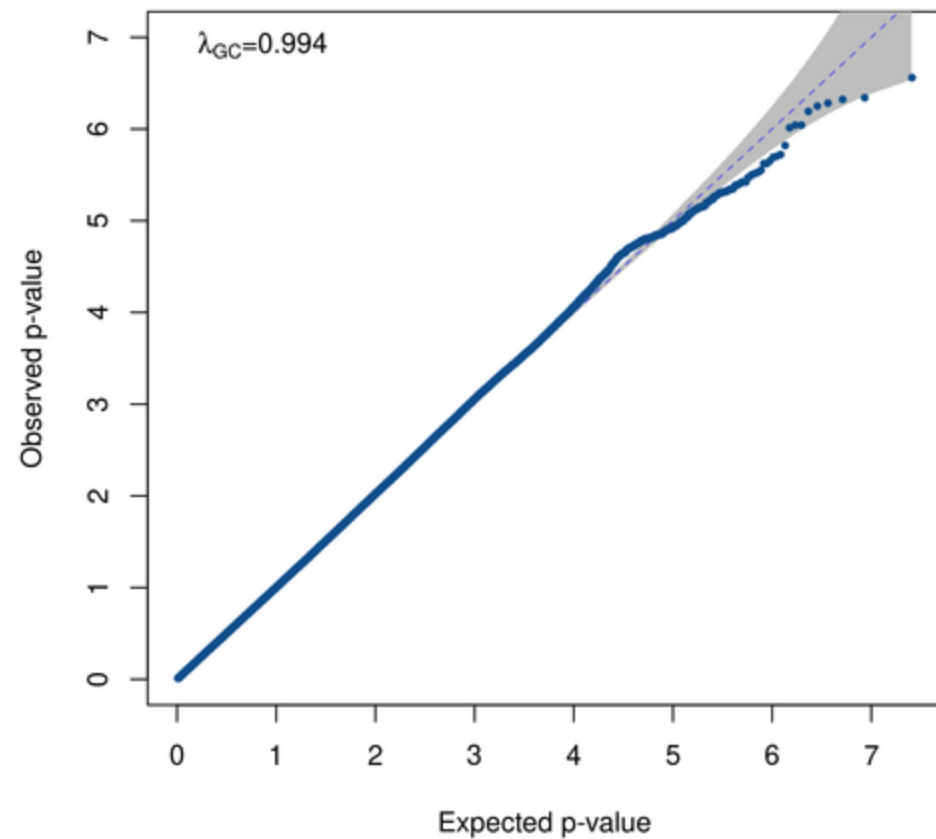

NT-3 (NTF3)

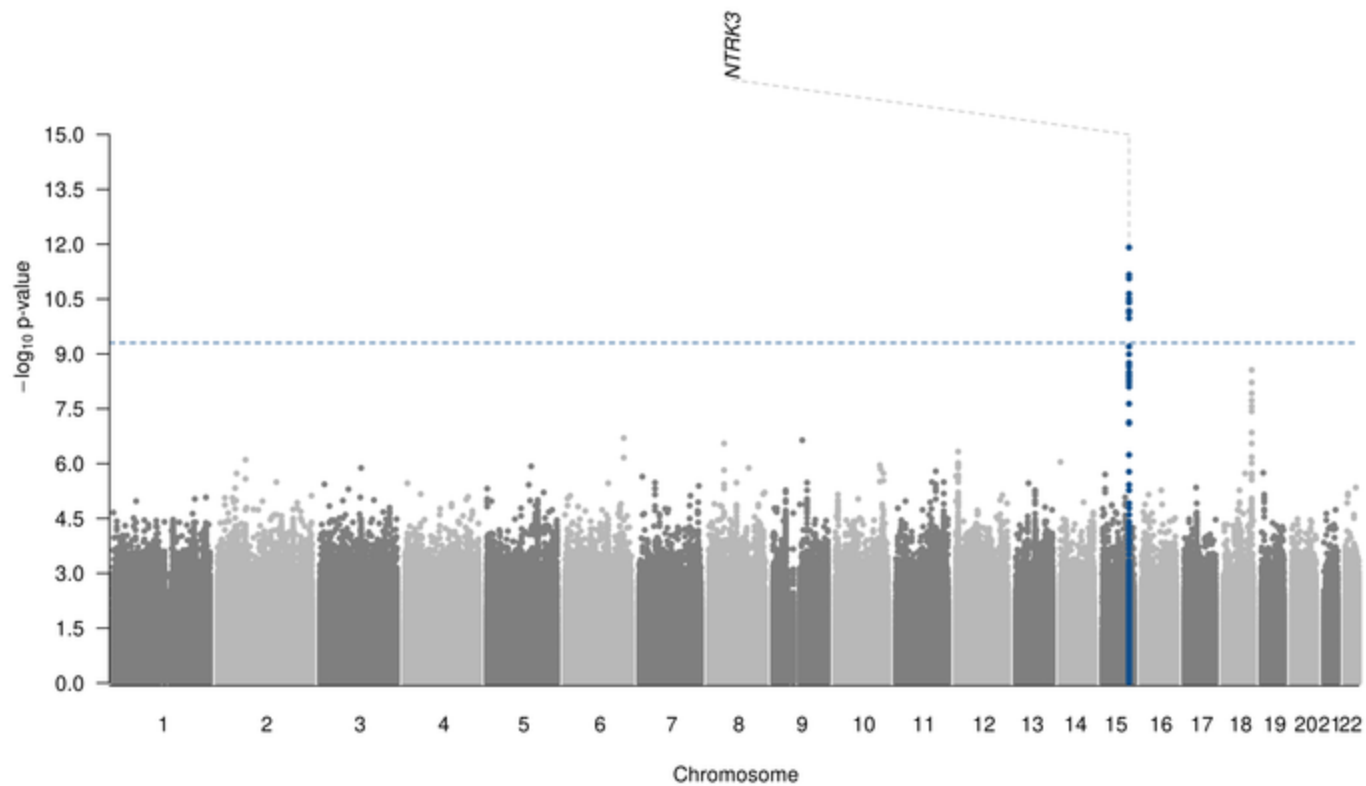

NT-3 (NTF3)

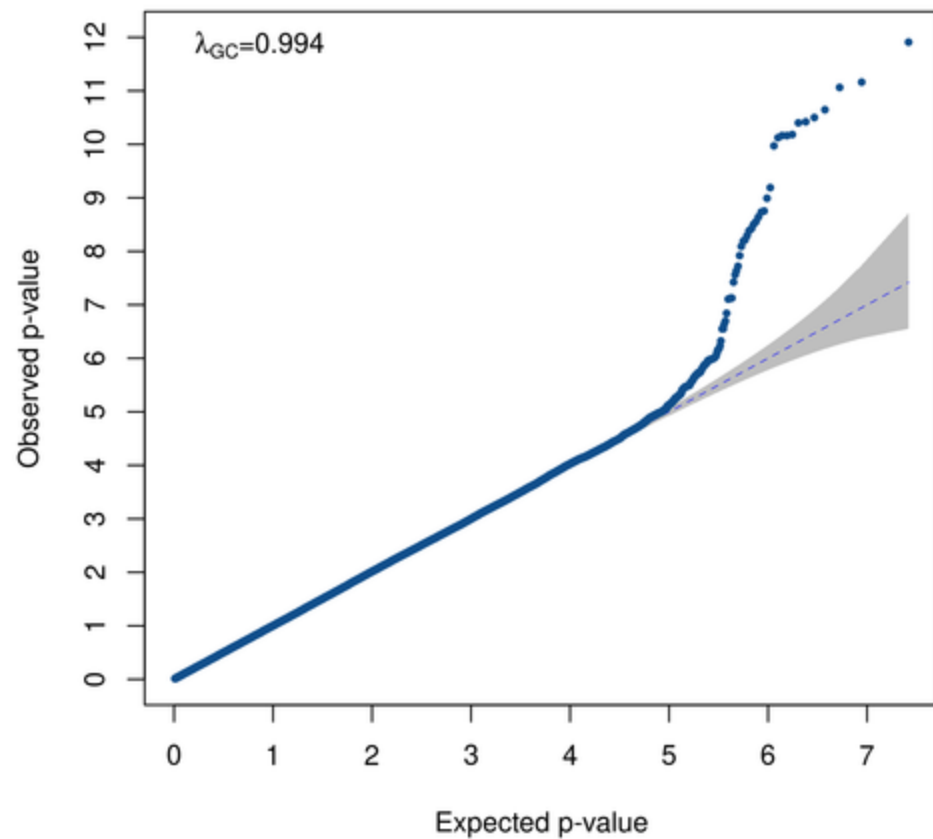



OPG (TNFRSF11B)

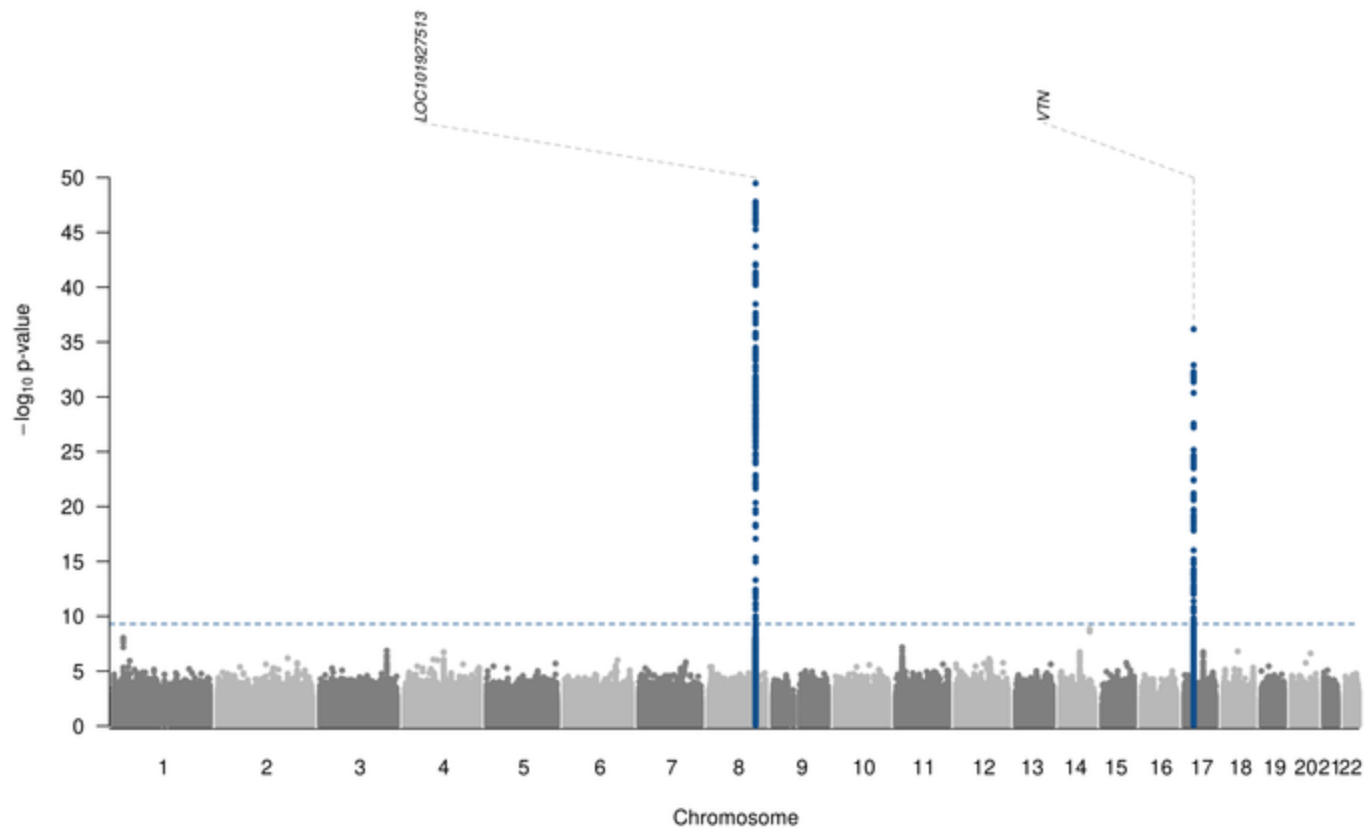

OPG (TNFRSF11B)

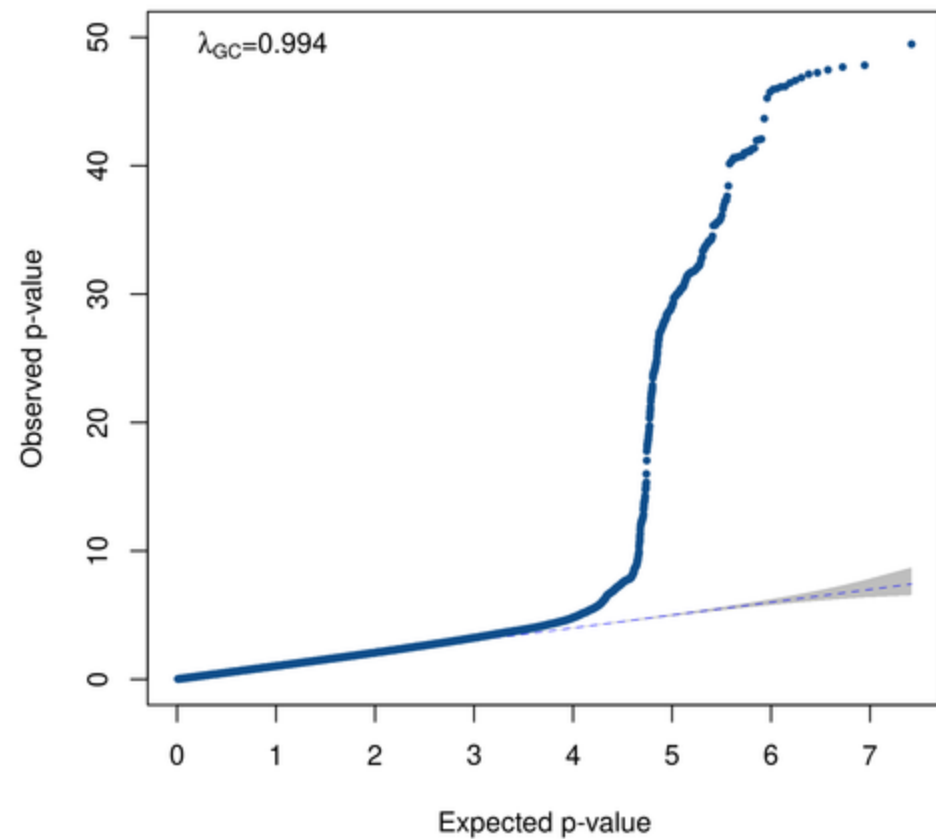

OSM (OSM)

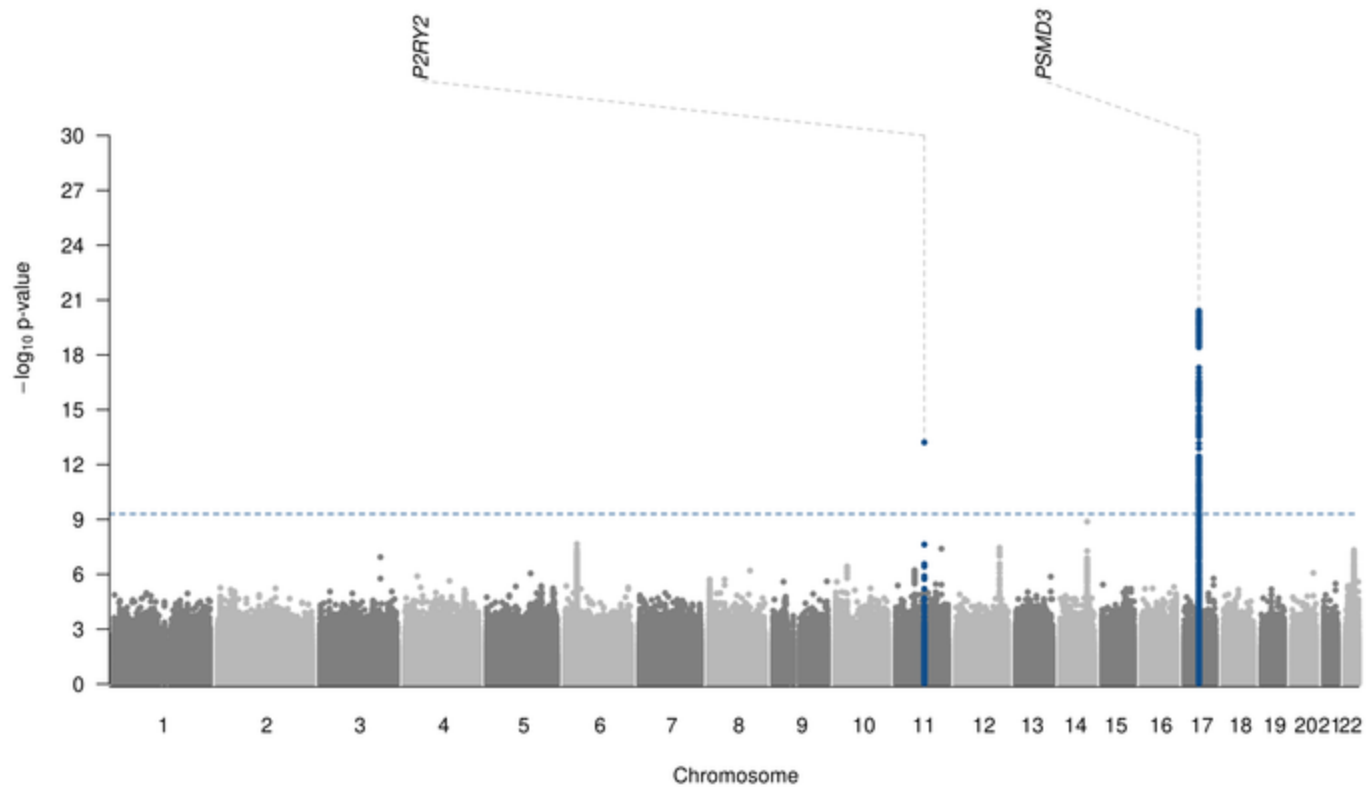

OSM (OSM)

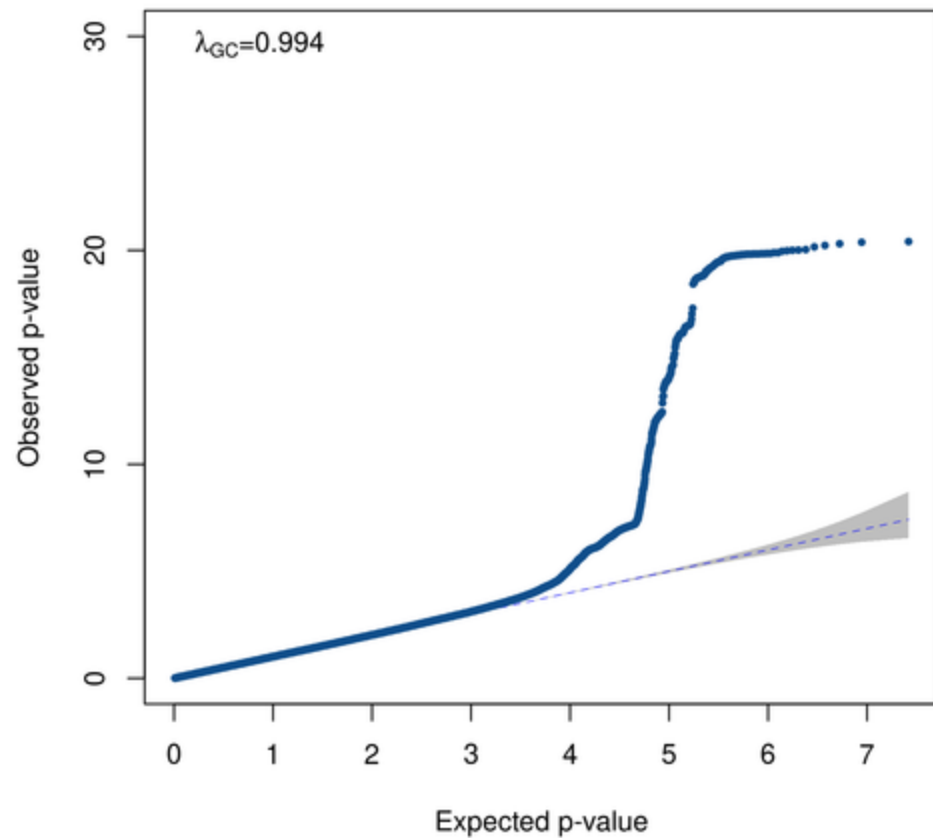

PD-L1 (CD274)

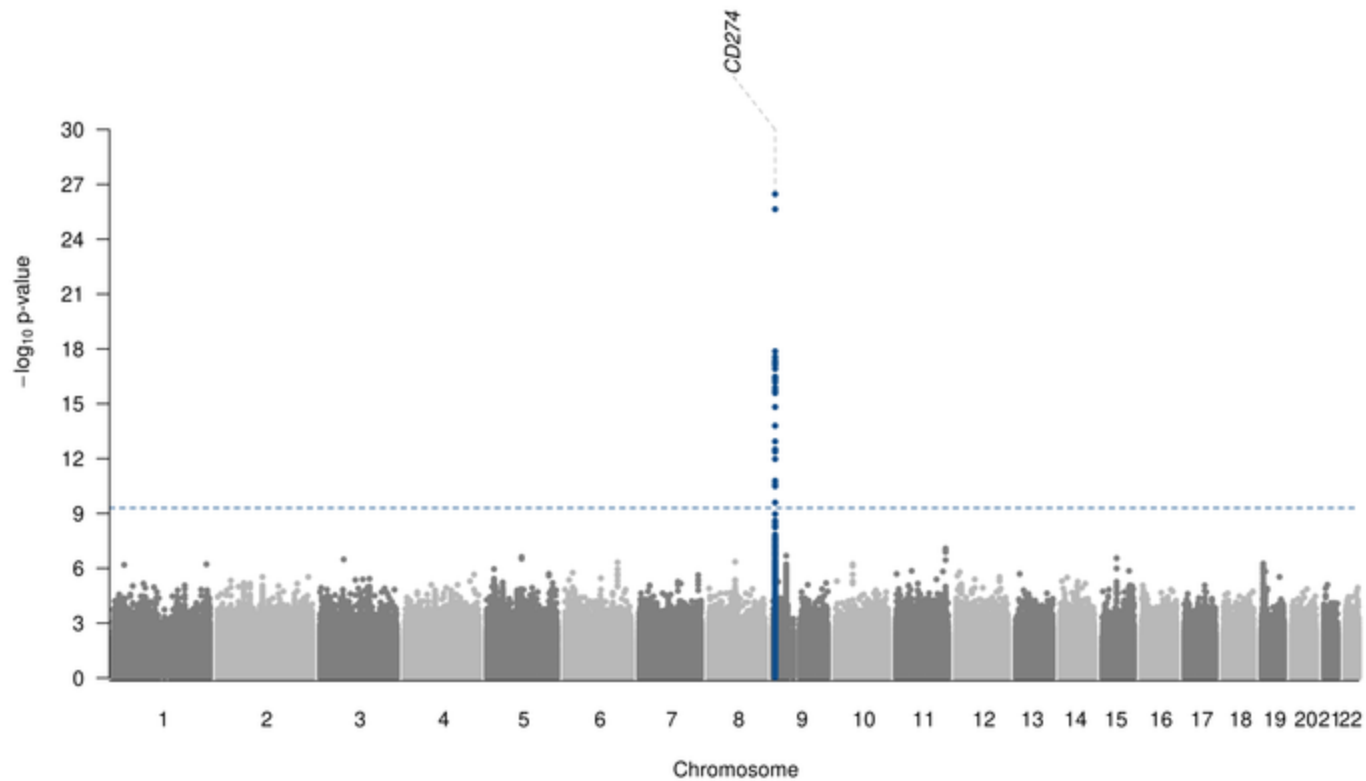

PD-L1 (CD274)

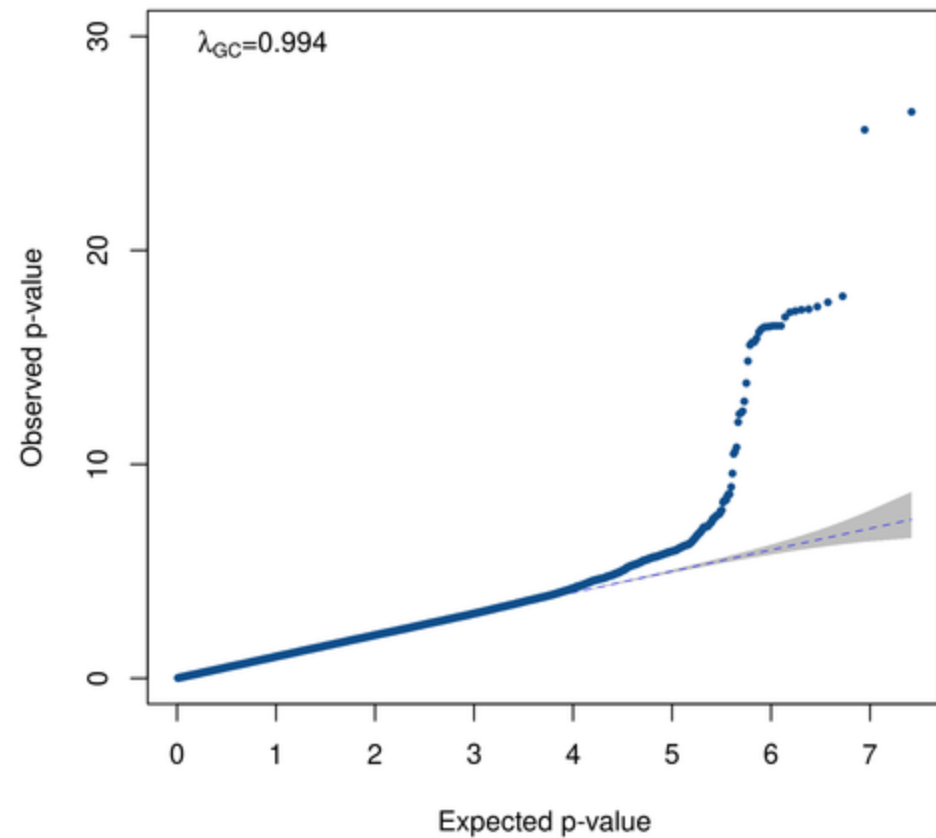

SCF (KITLG)

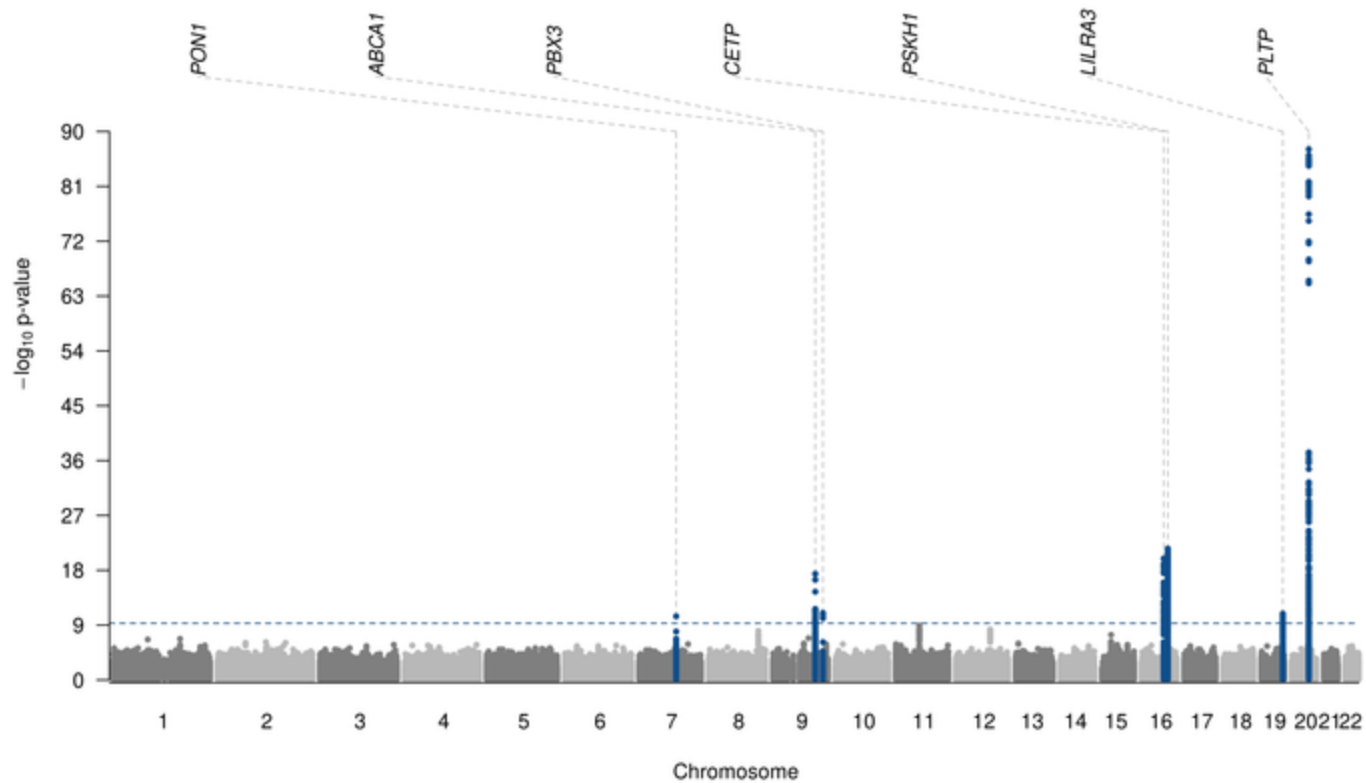

SCF (KITLG)

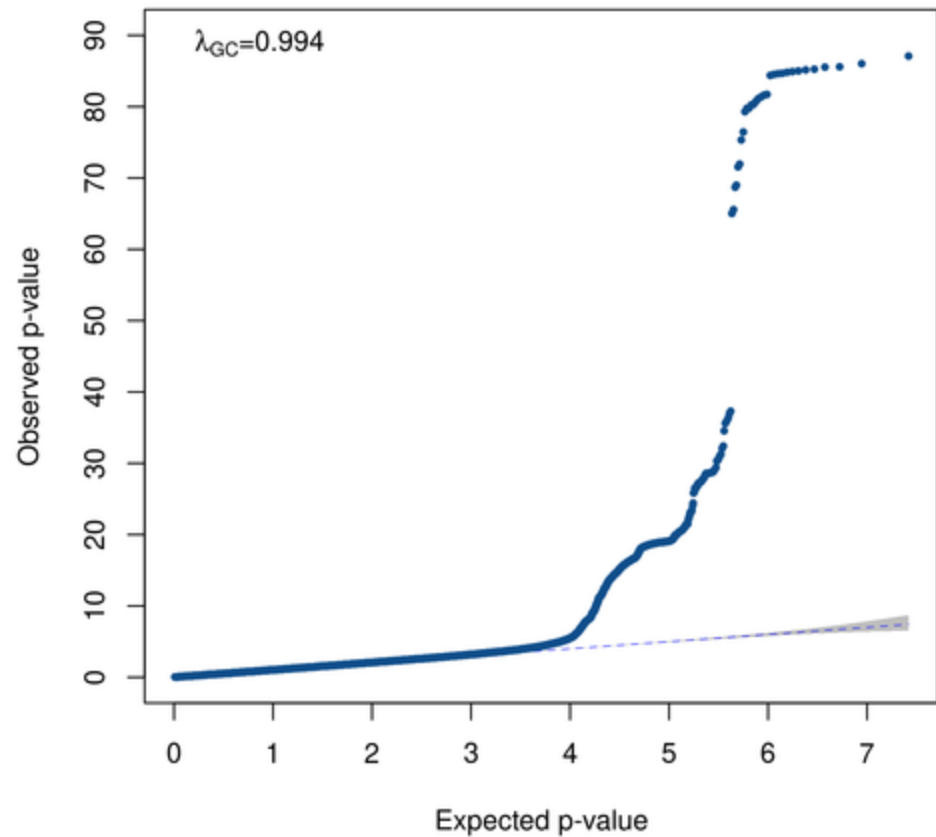

SIRT2 (SIRT2)

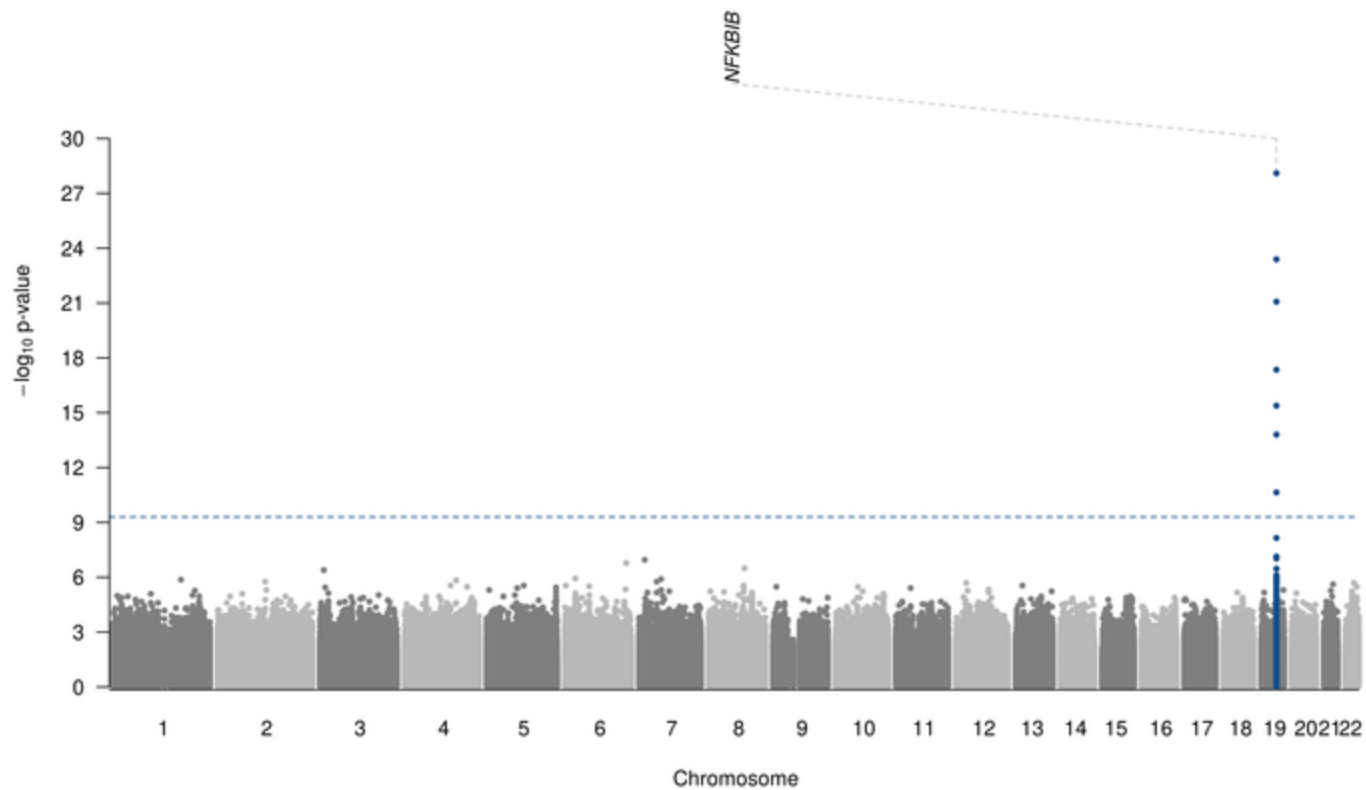

SIRT2 (SIRT2)

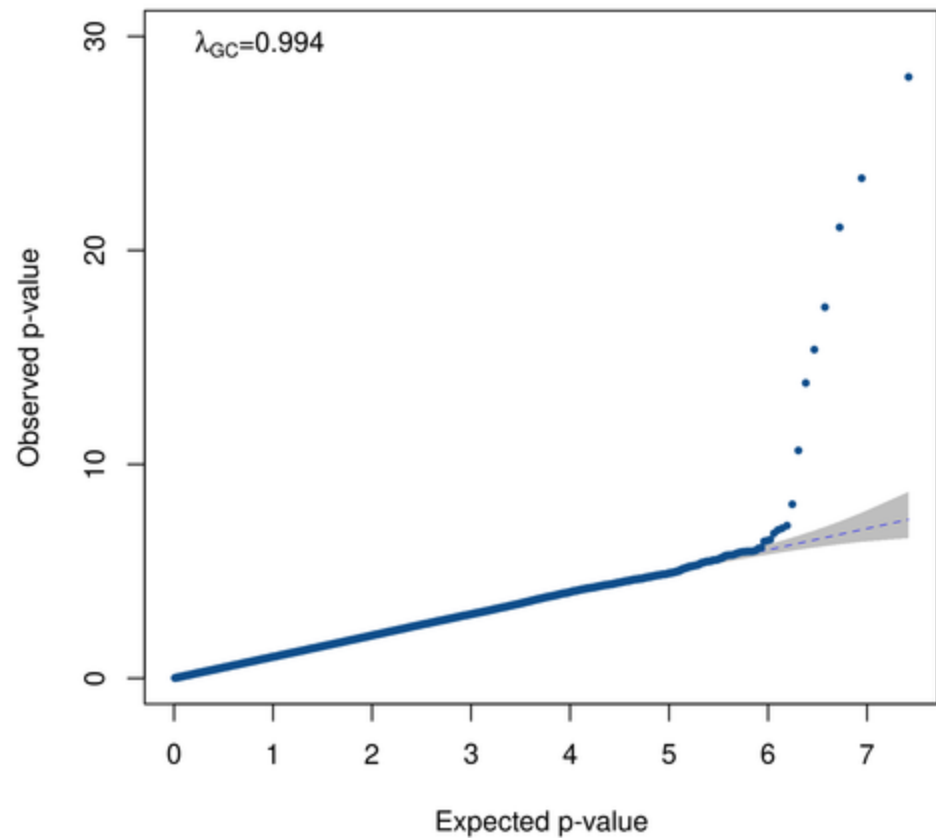

SLAMF1 (SLAMF1)

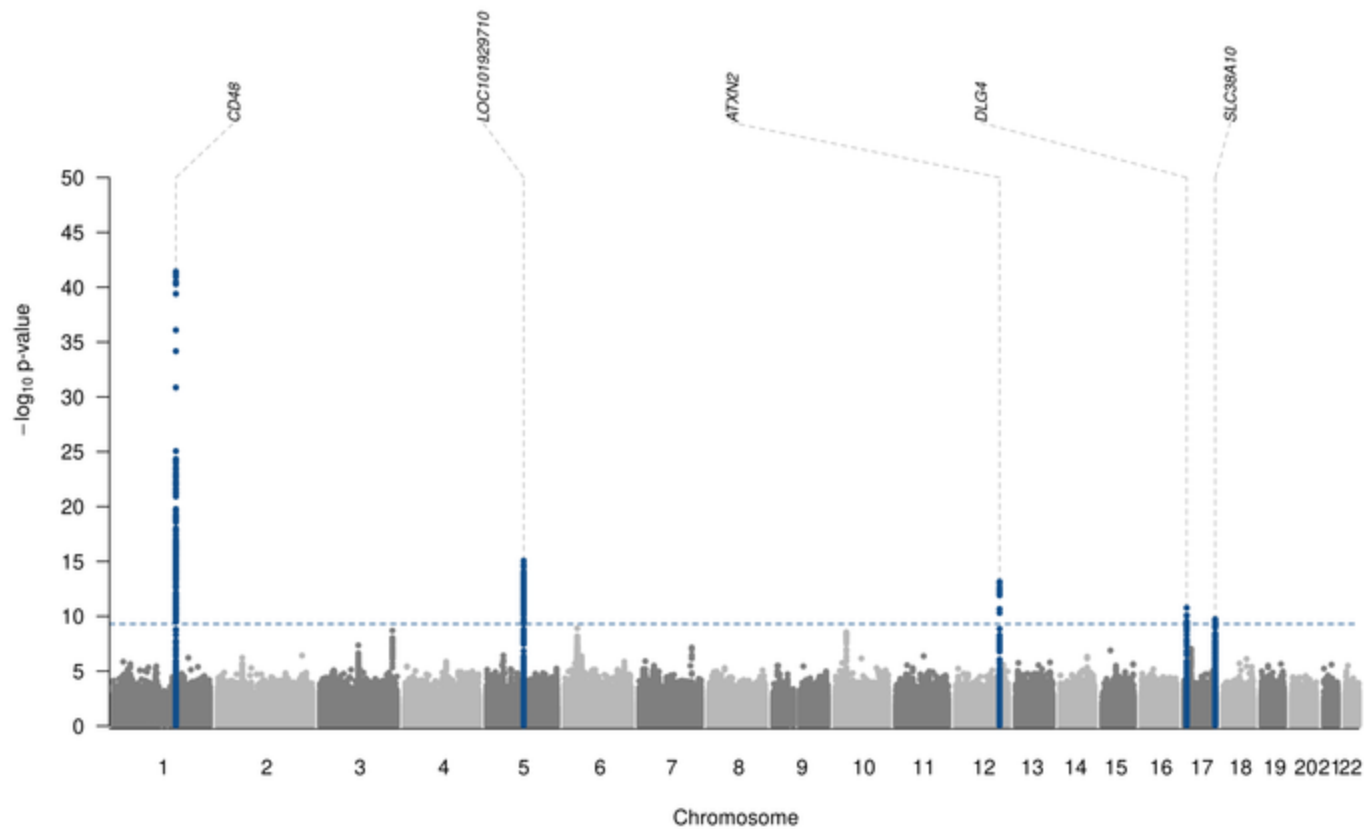

SLAMF1 (SLAMF1)

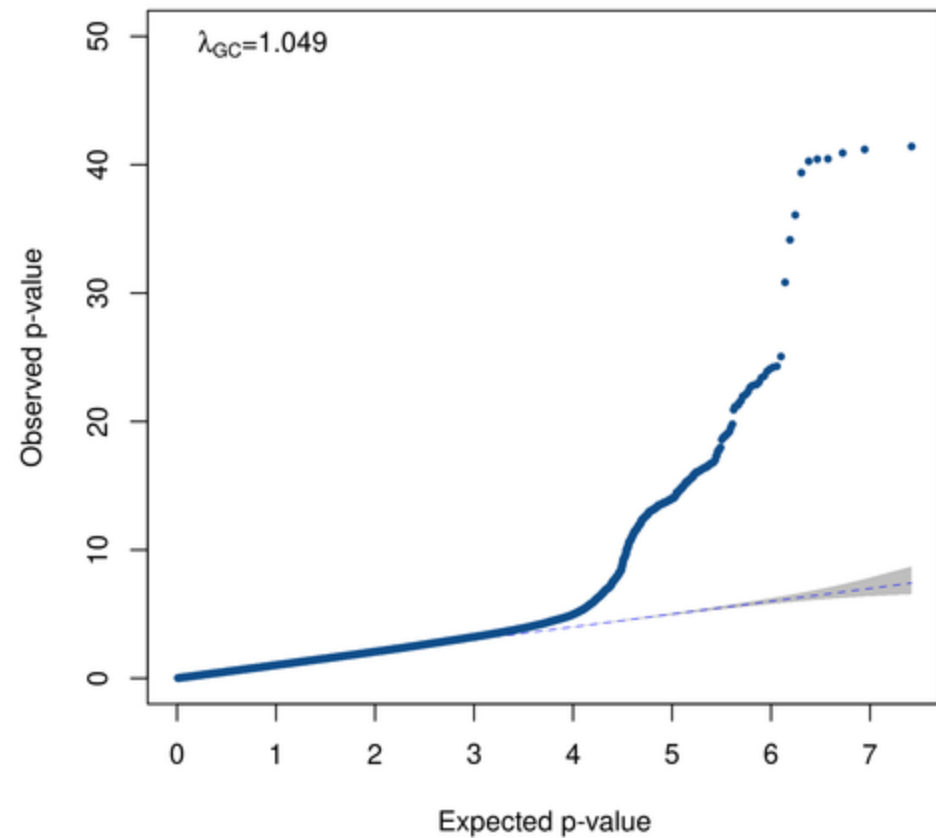

ST1A1 (SULT1A1)

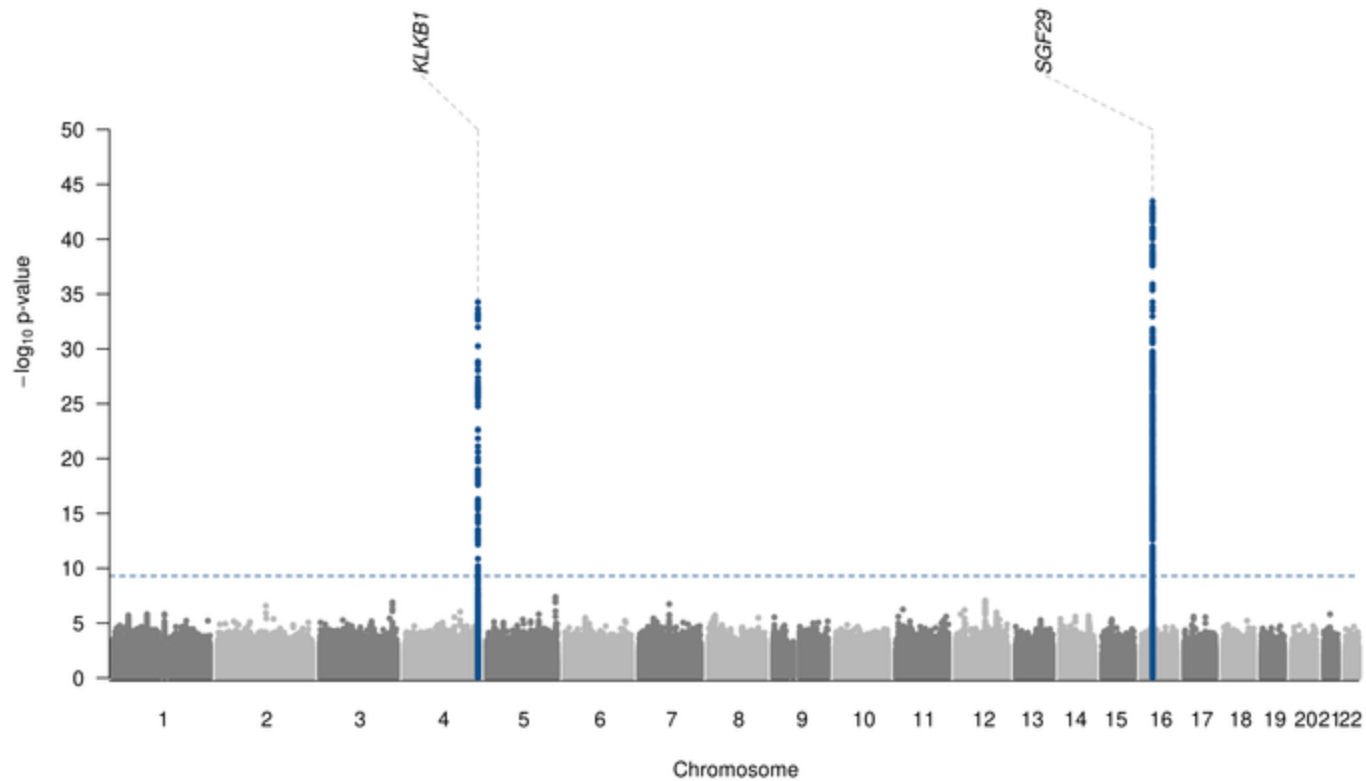

ST1A1 (SULT1A1)

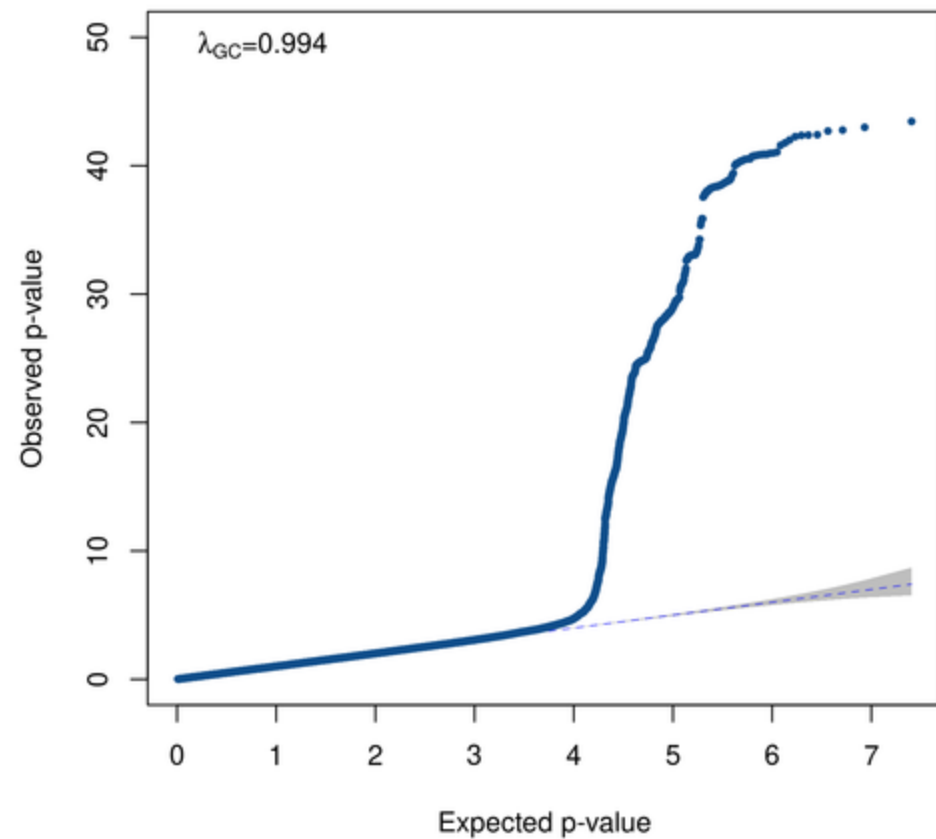

STAMPB (STAMPB)

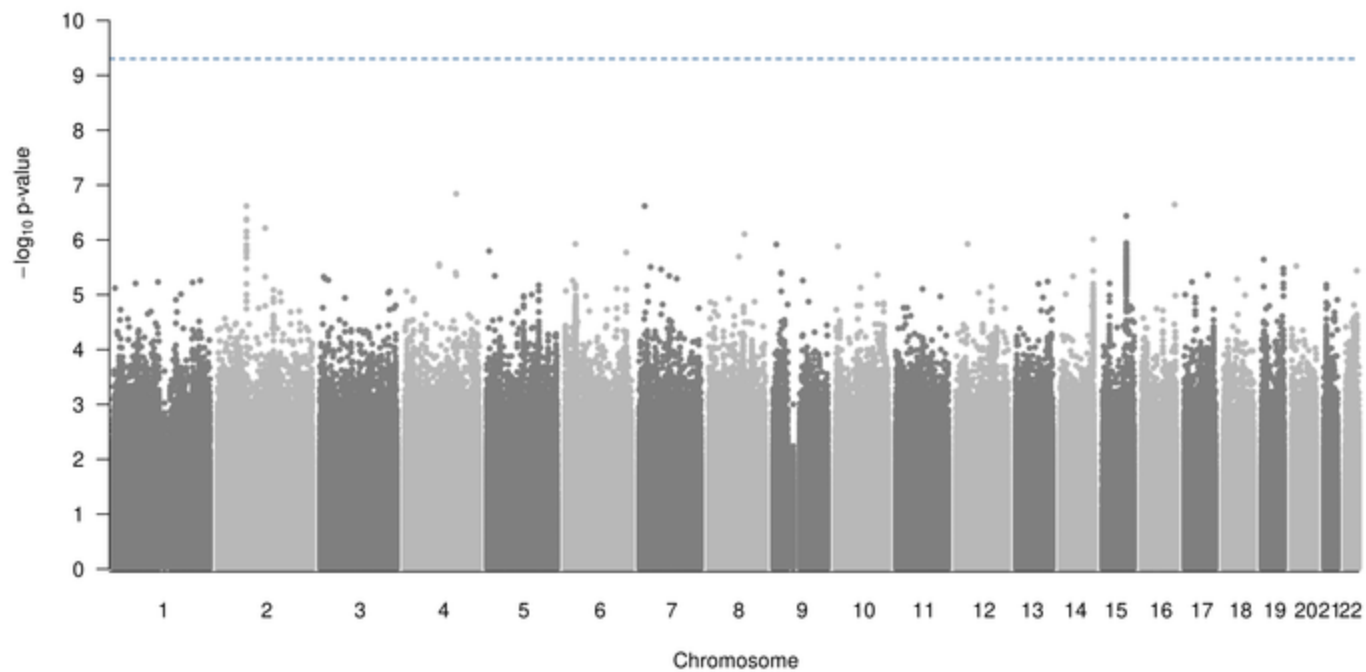

STAMPB (STAMPB)

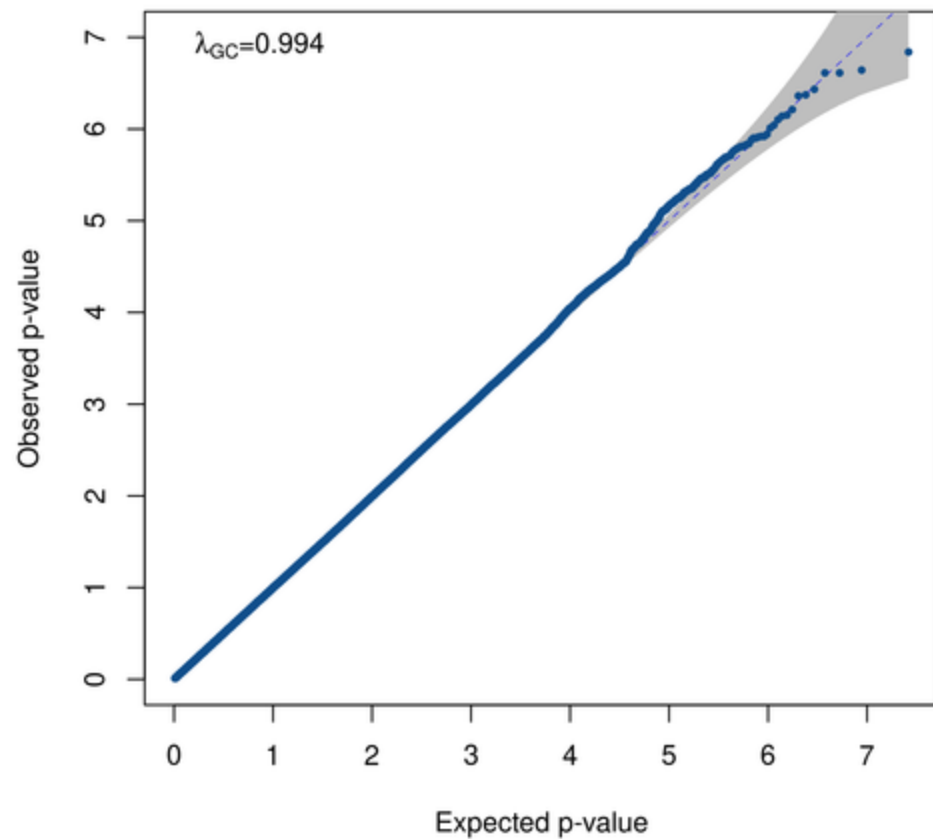



TGF-alpha (TGFA)

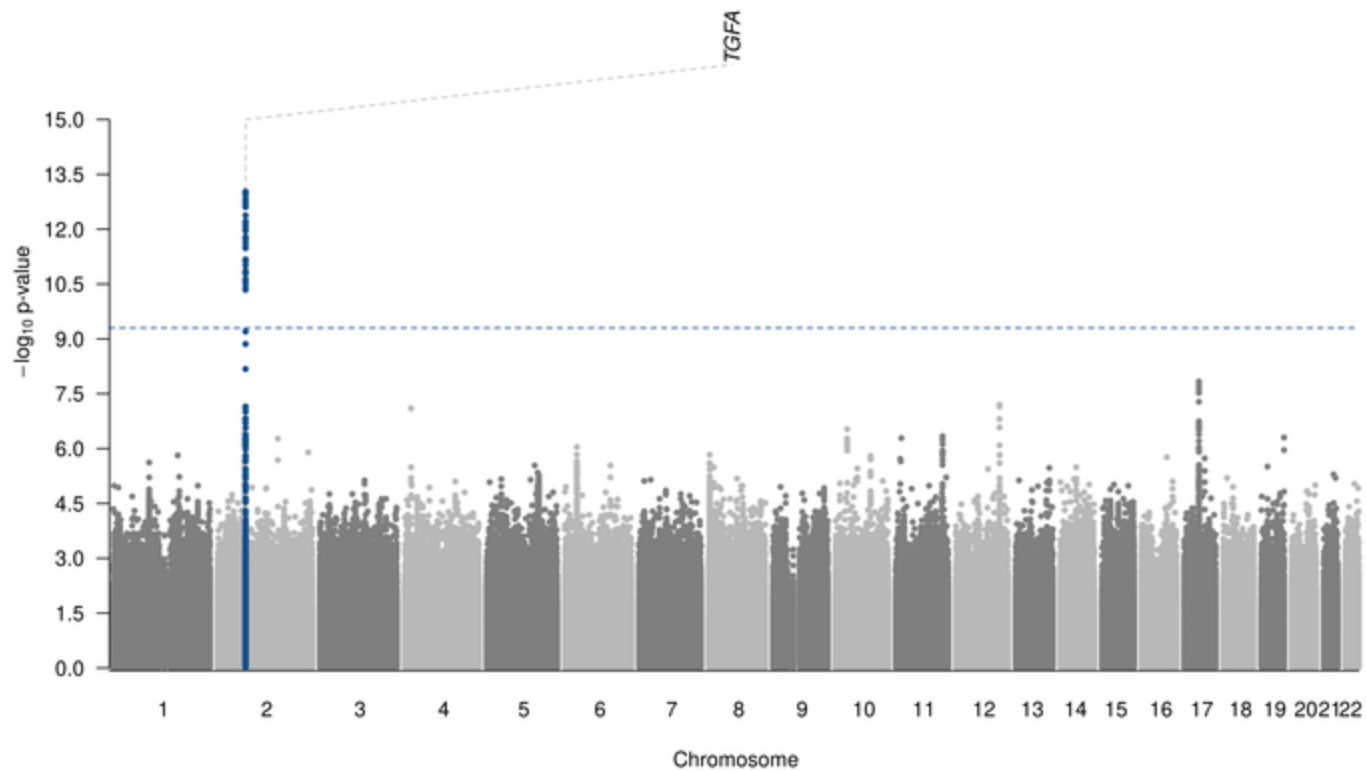

TGF-alpha (TGFA)

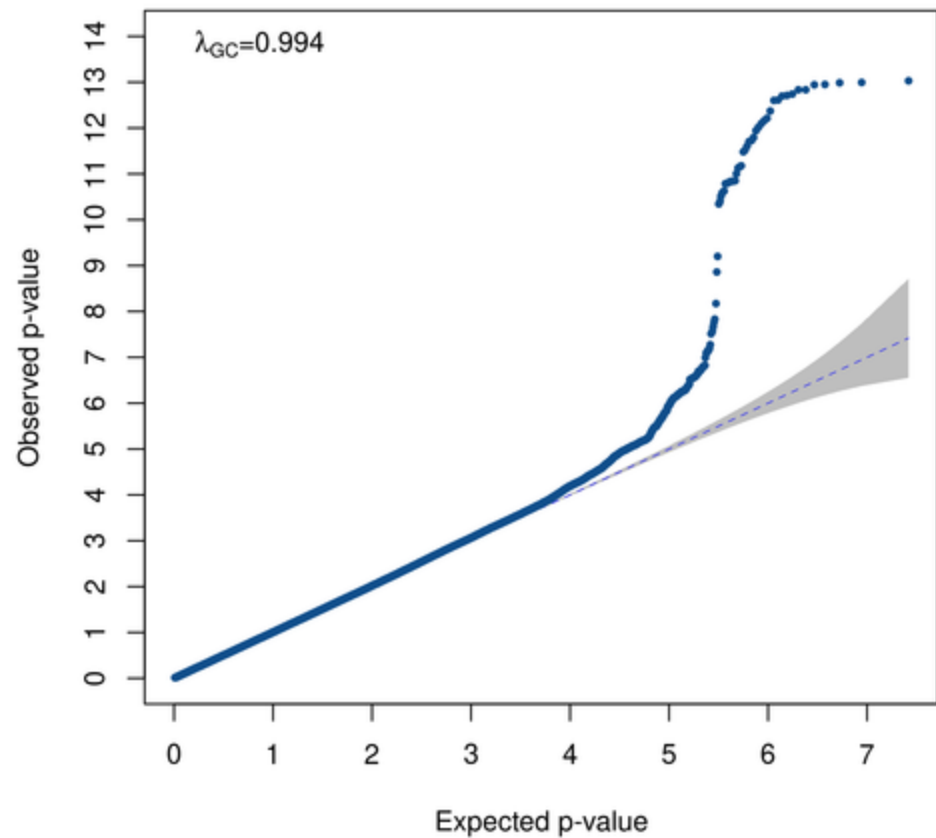

TNFB (LTA)

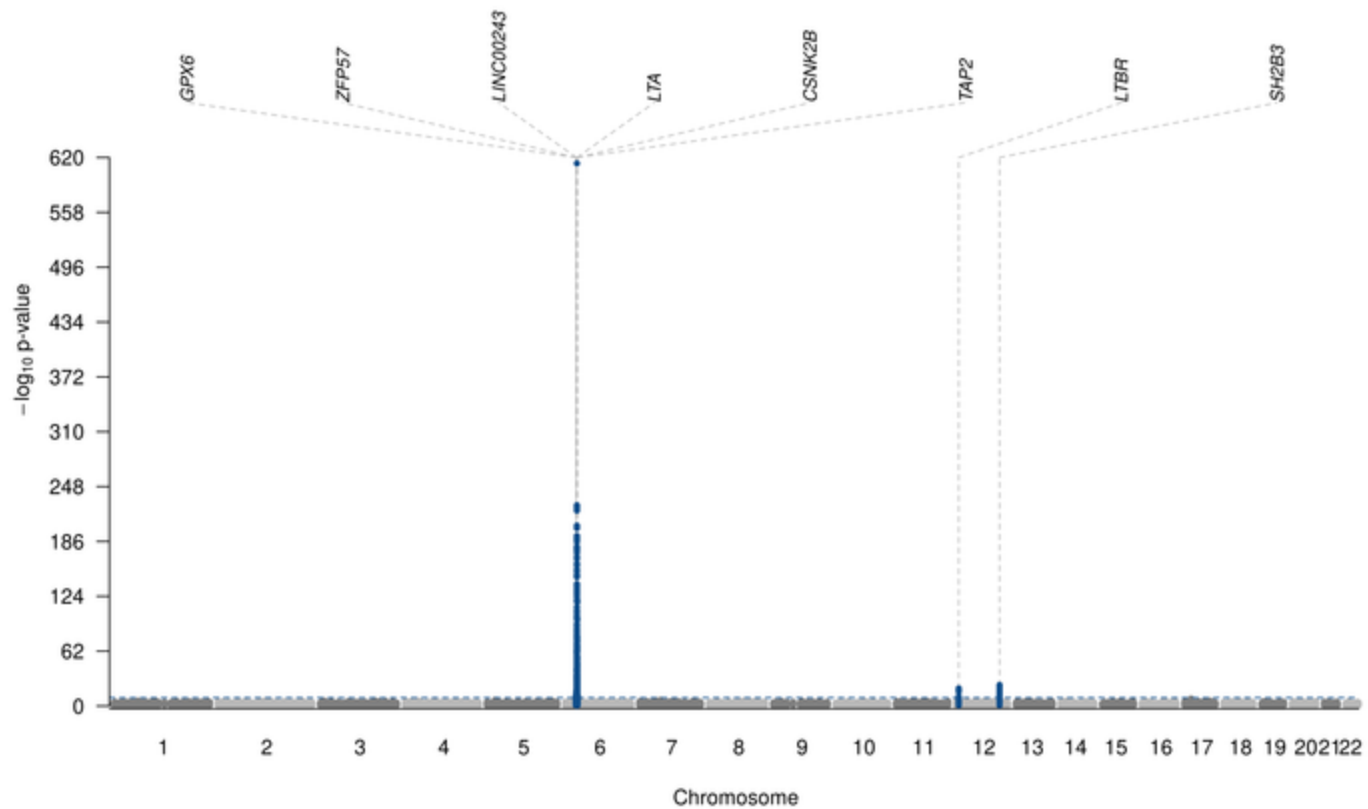

TNFB (LTA)

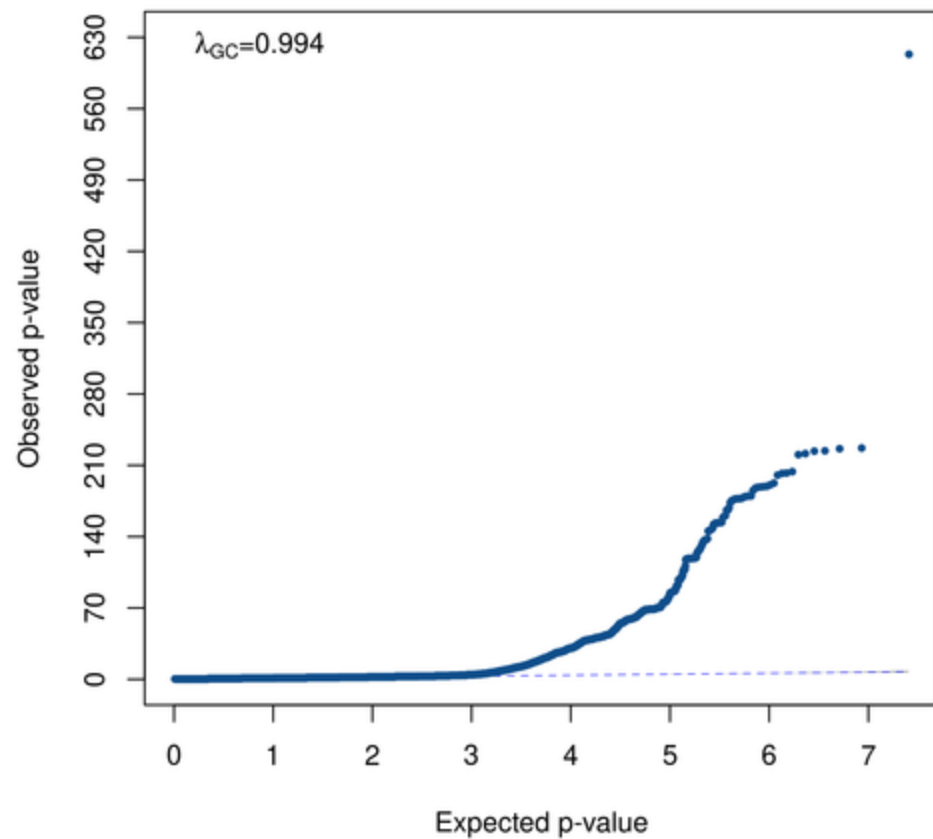

TNF (TNF)

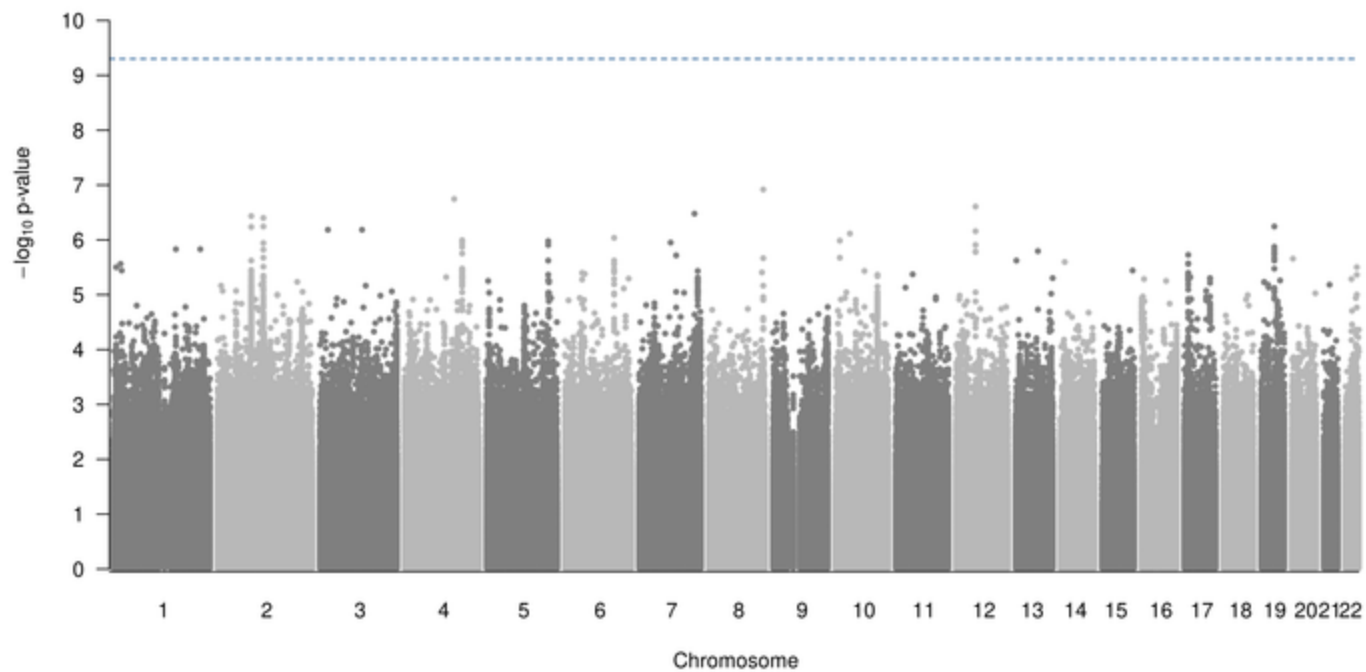

TNF (TNF)

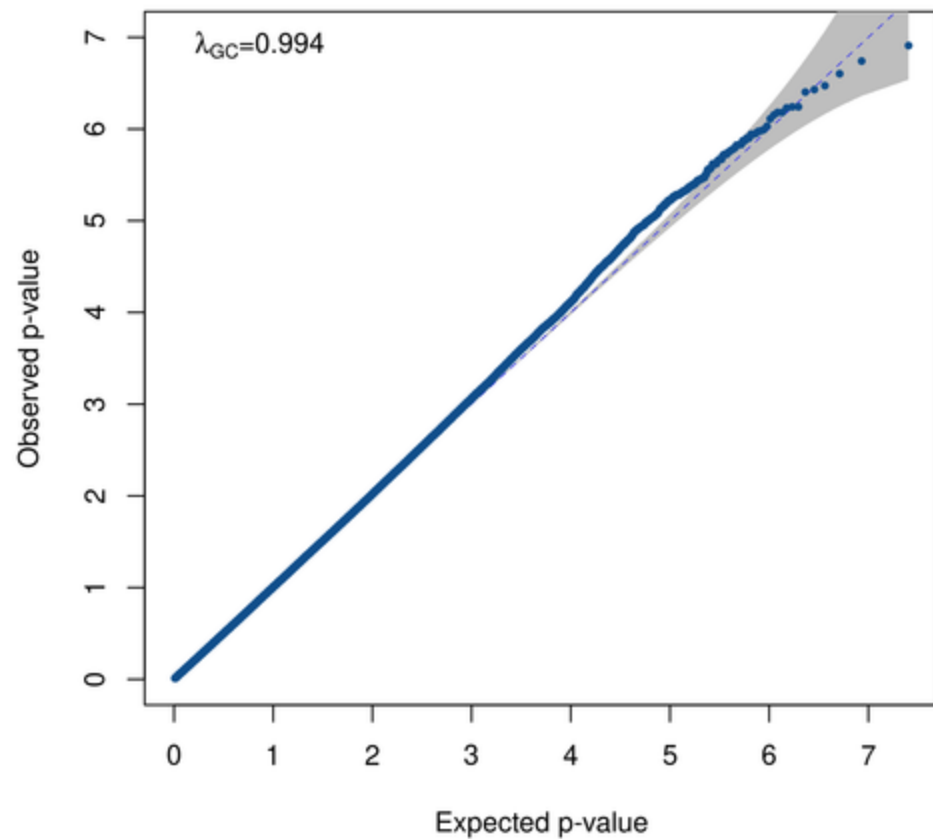

TNFRSF9 (TNFRSF9)

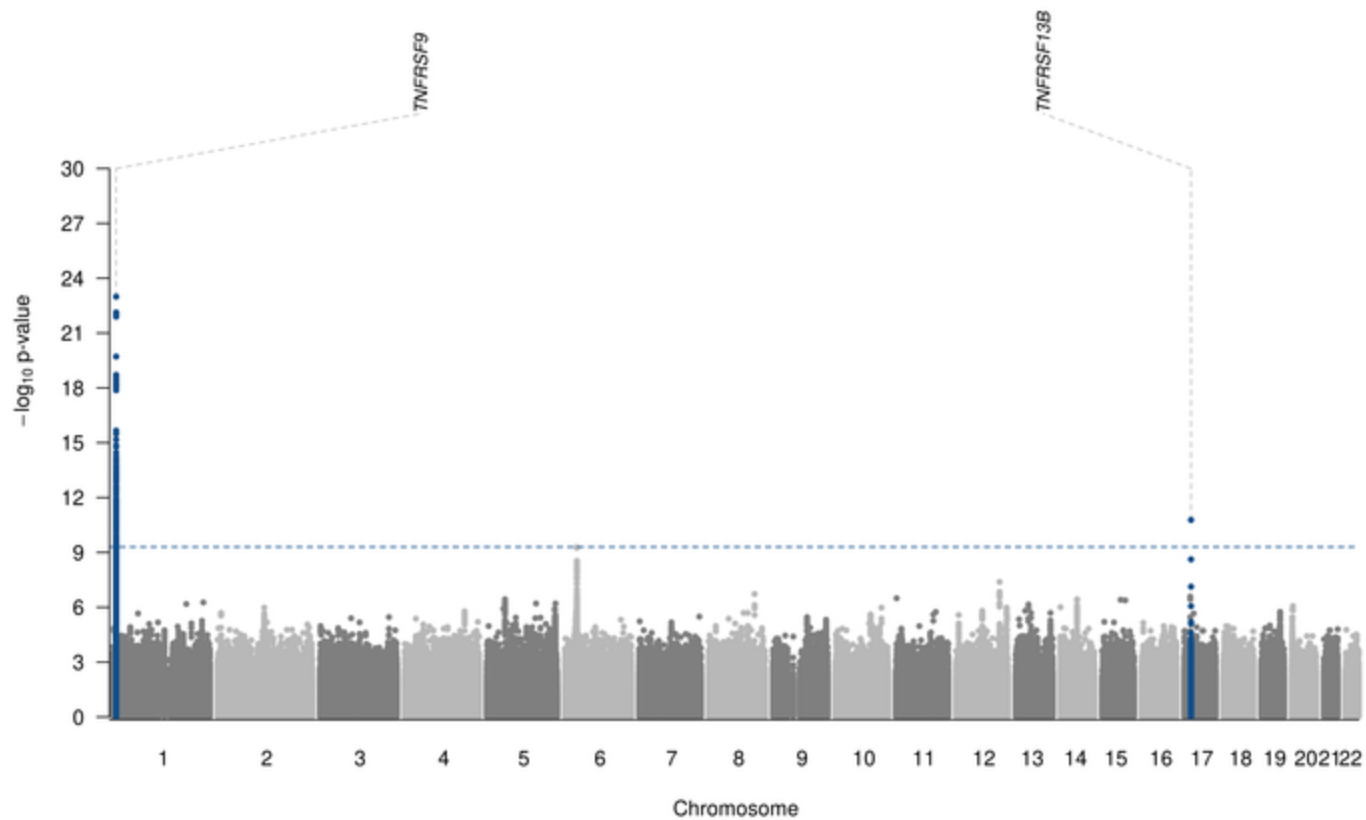

TNFRSF9 (TNFRSF9)

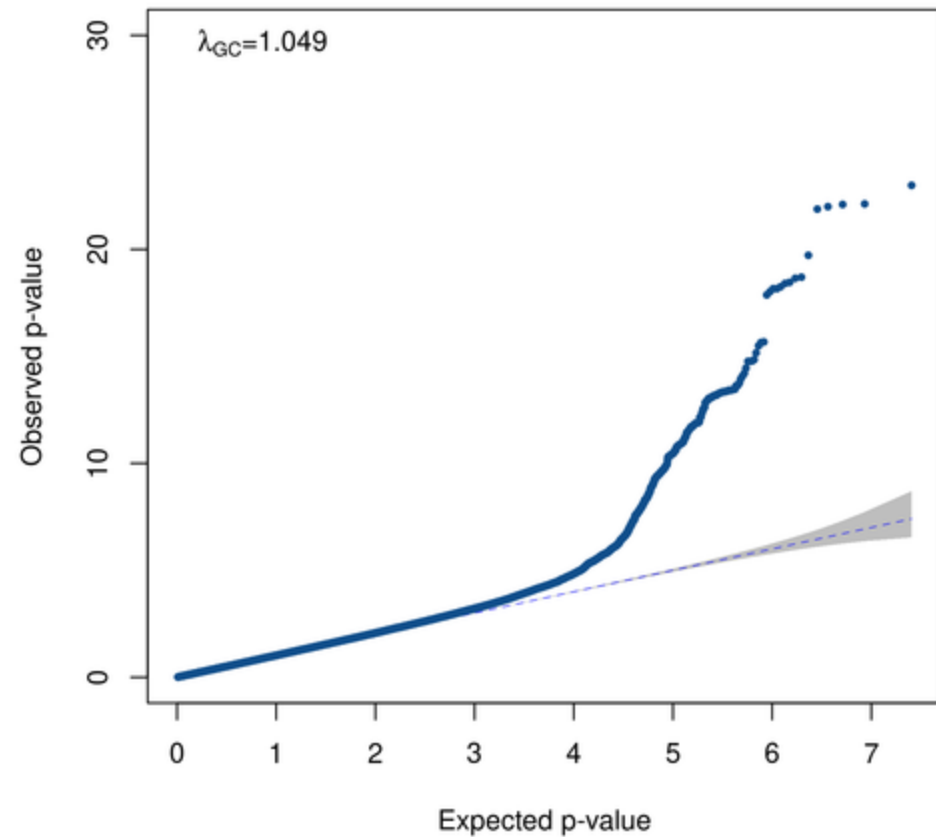

TNFSF14 (TNFSF14)

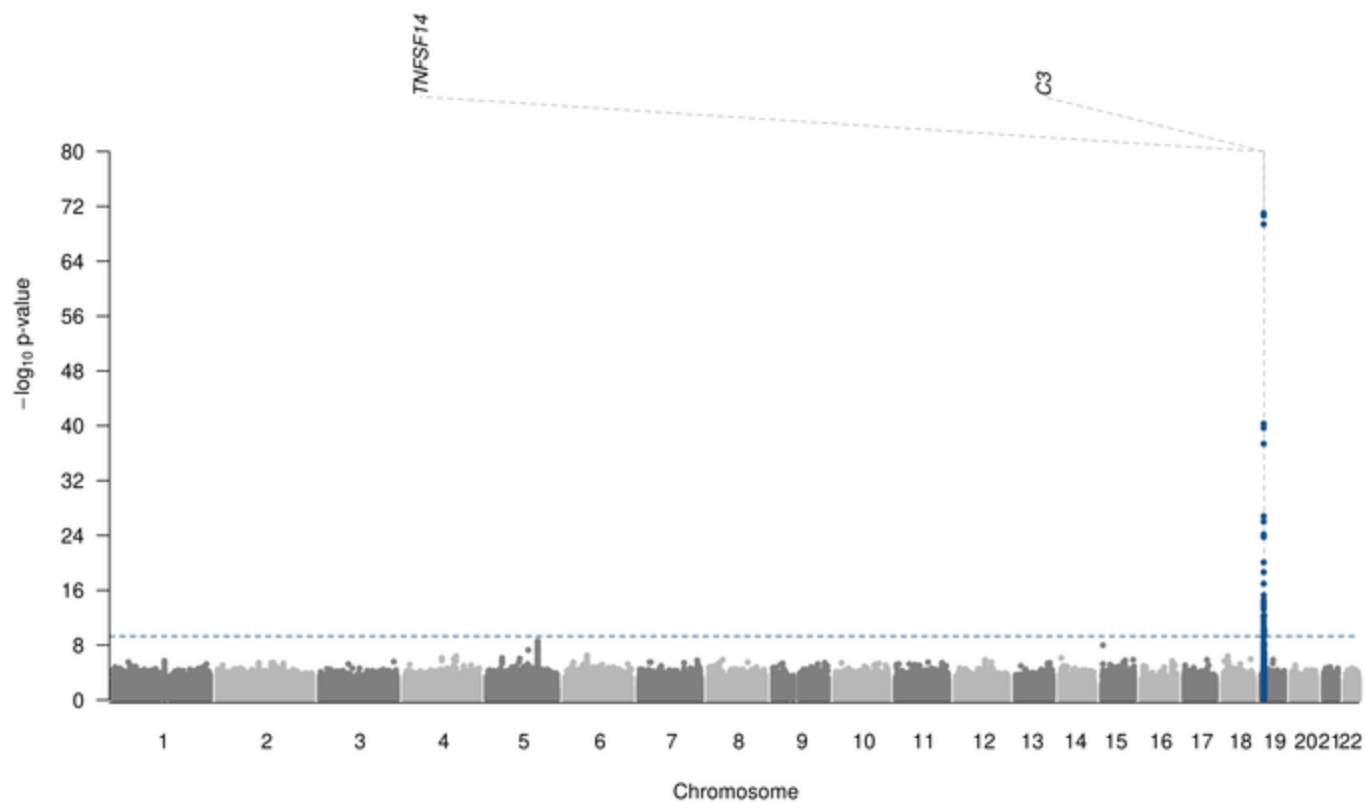

TNFSF14 (TNFSF14)

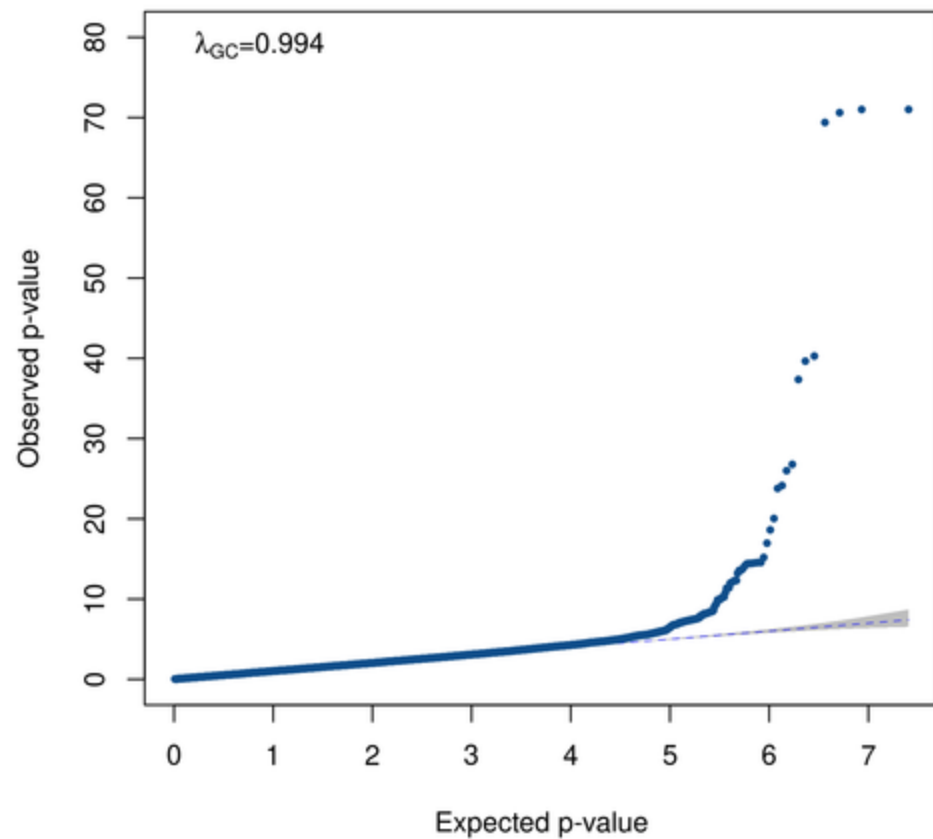

TRAIL (TNFSF10)

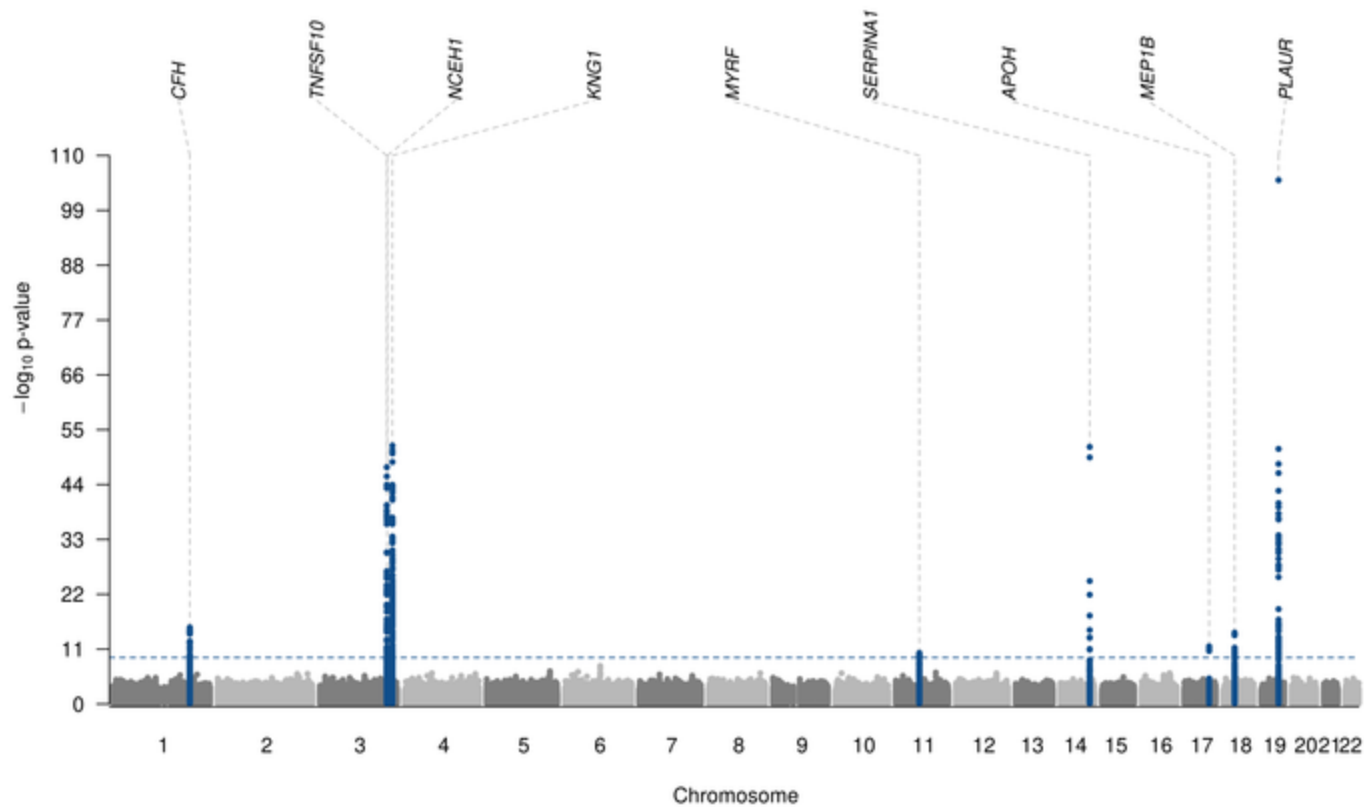

TRAIL (TNFSF10)

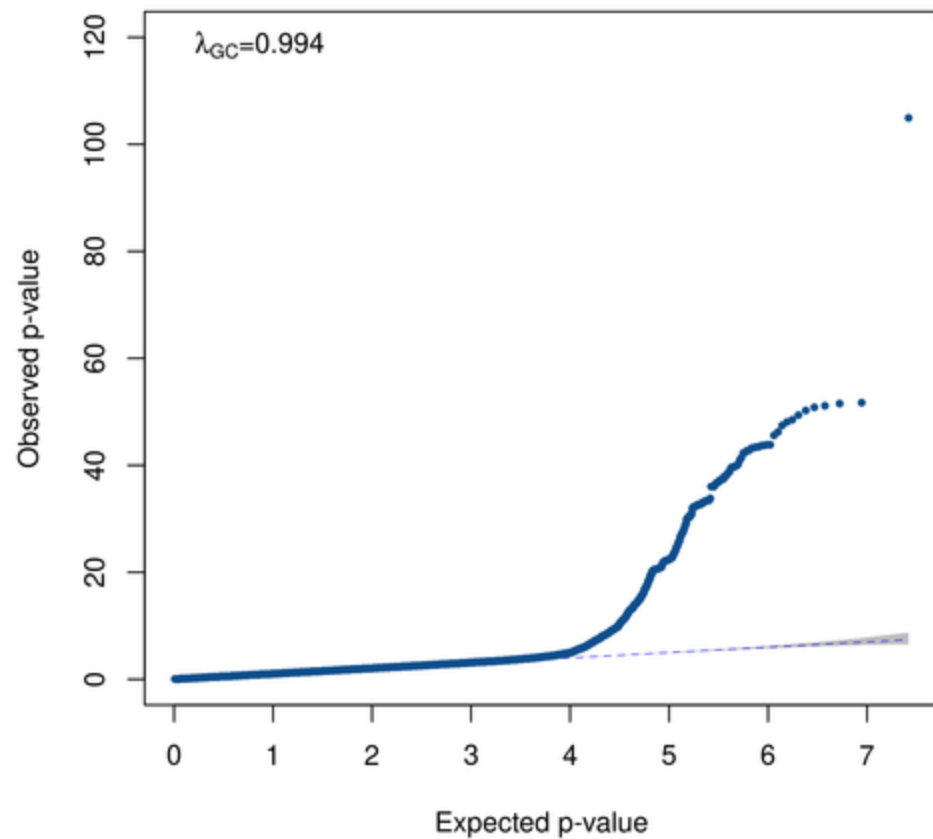

TRANCE (TNFSF11)

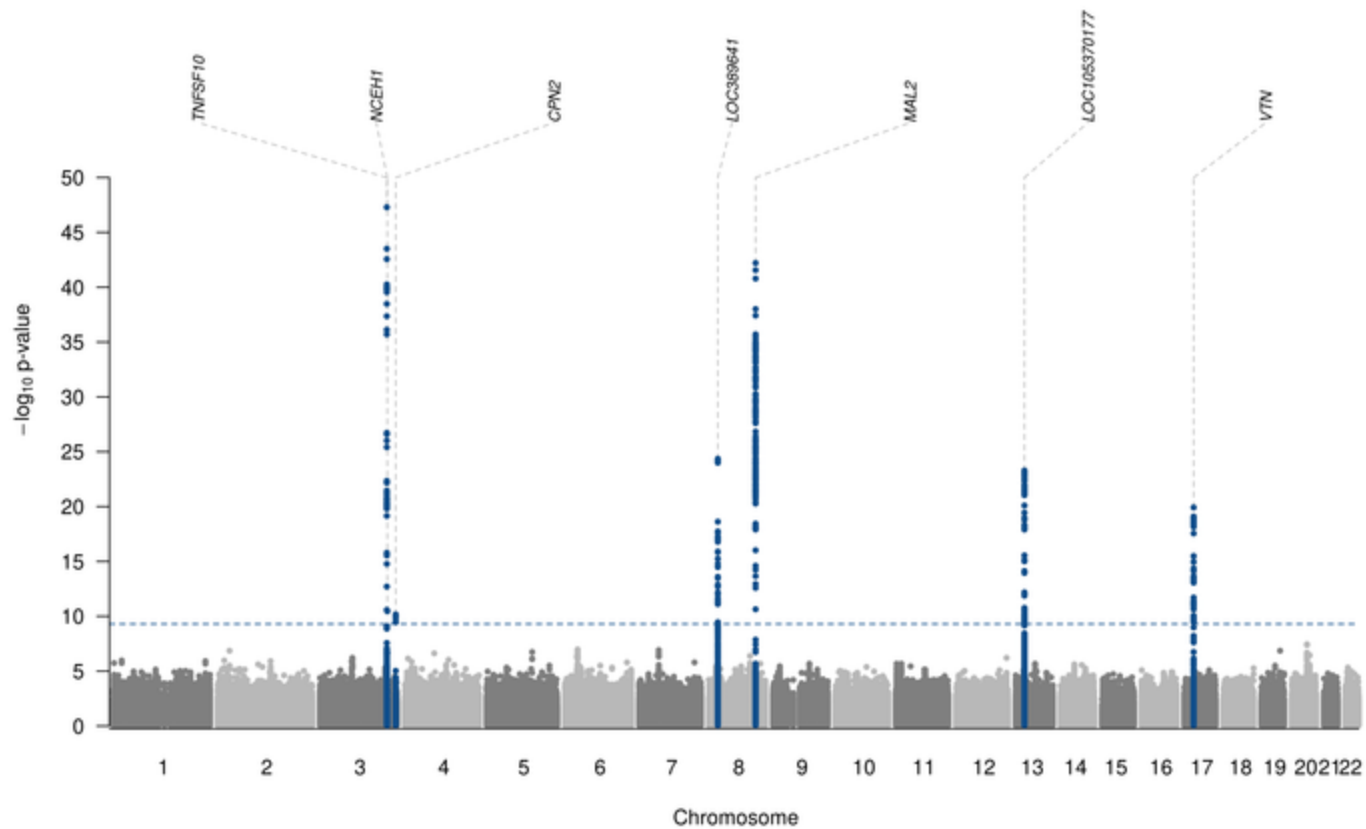

TRANCE (TNFSF11)

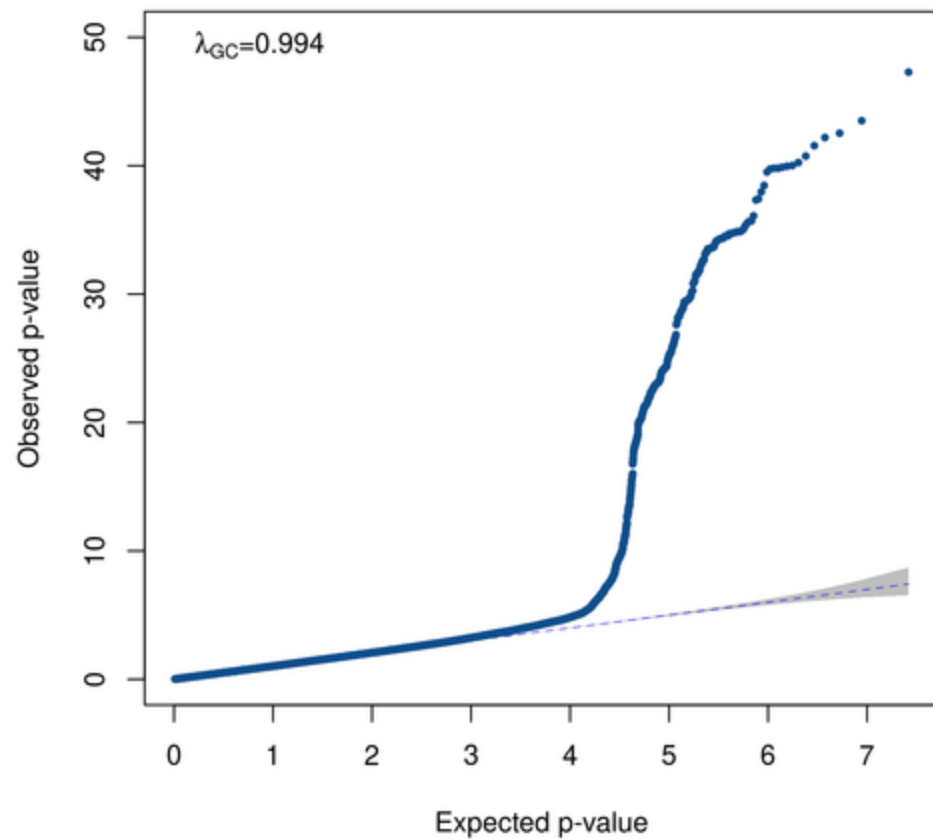

TSLP (TSLP)

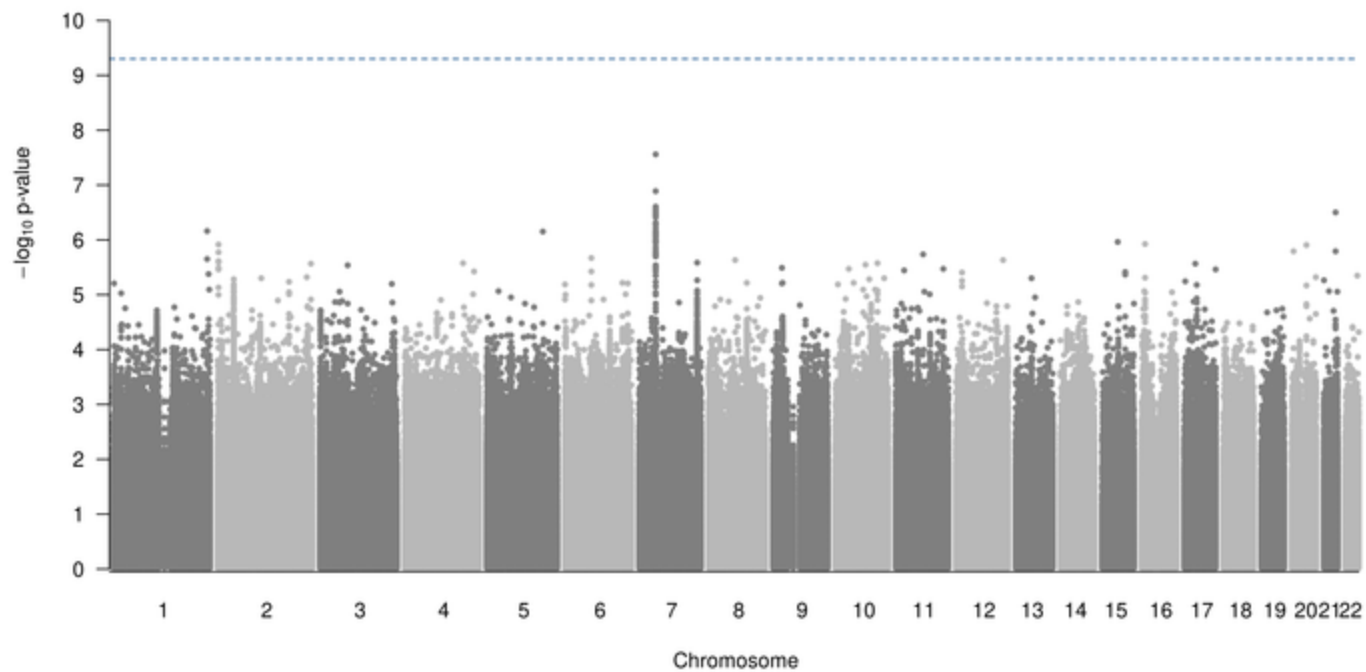

TSLP (TSLP)

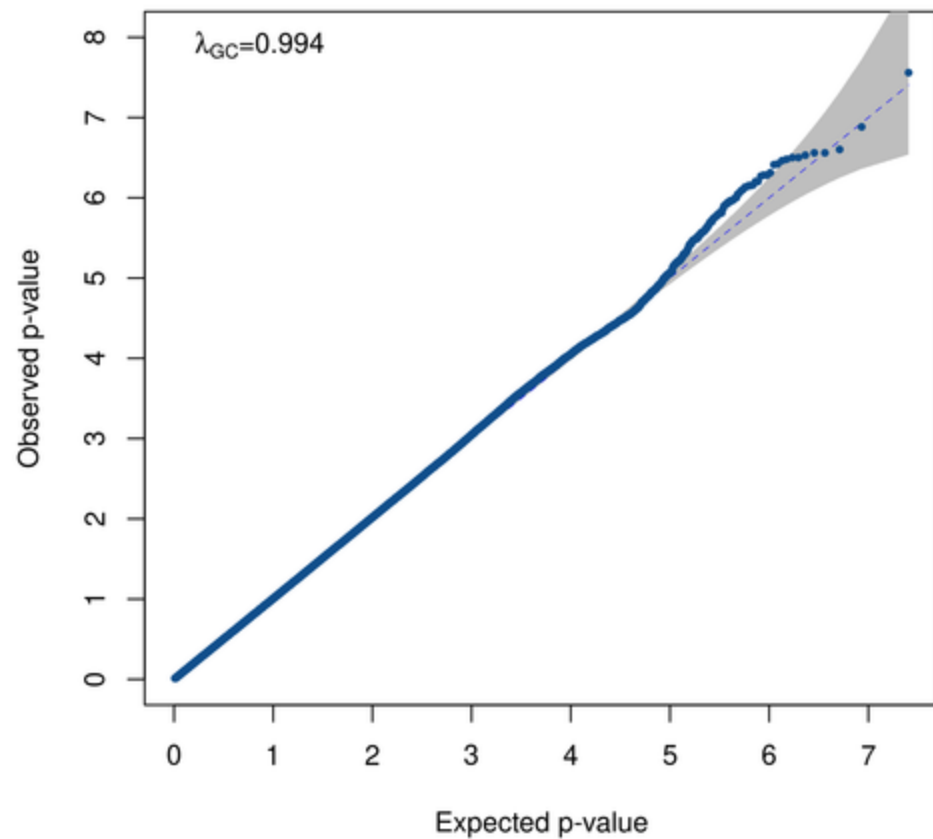



TWEAK (TNFSF12)

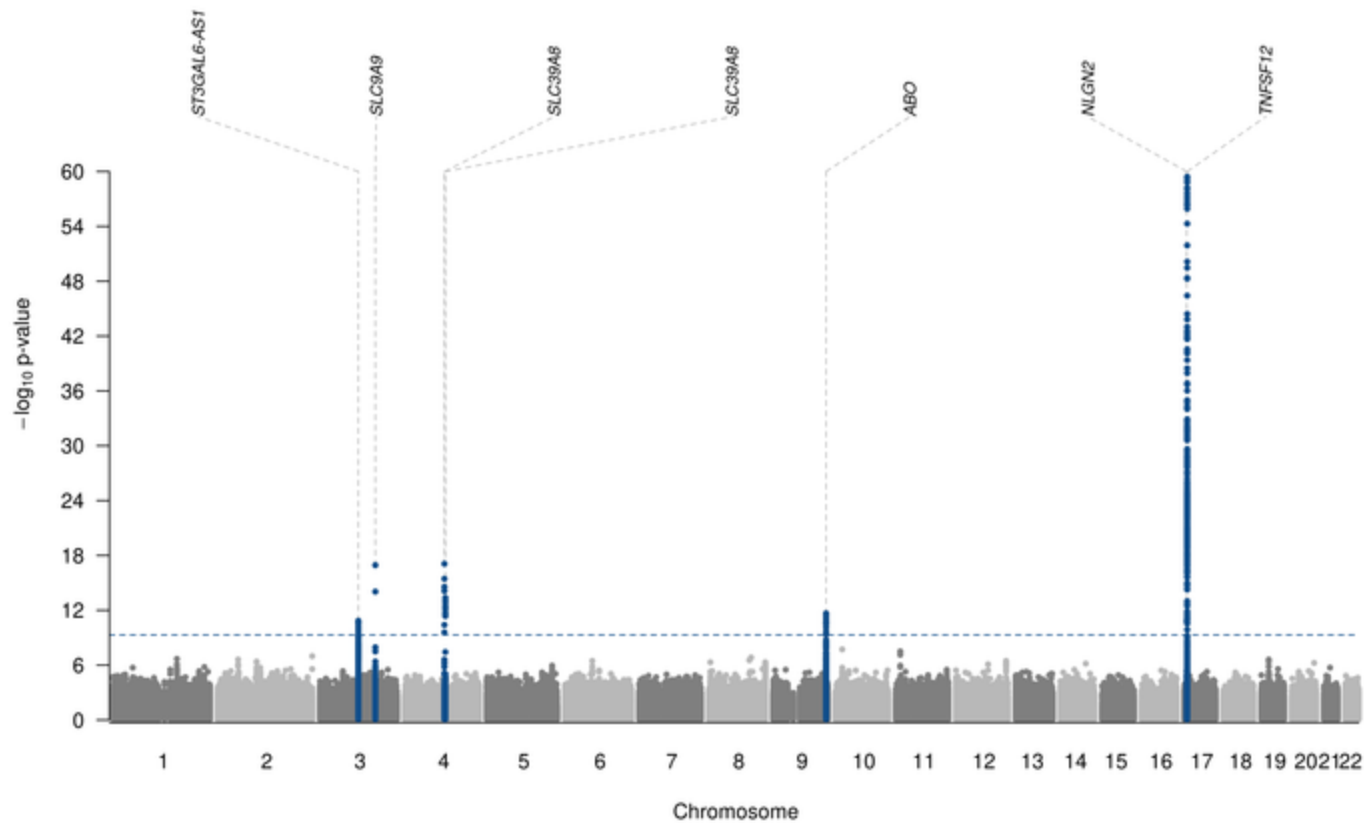

TWEAK (TNFSF12)

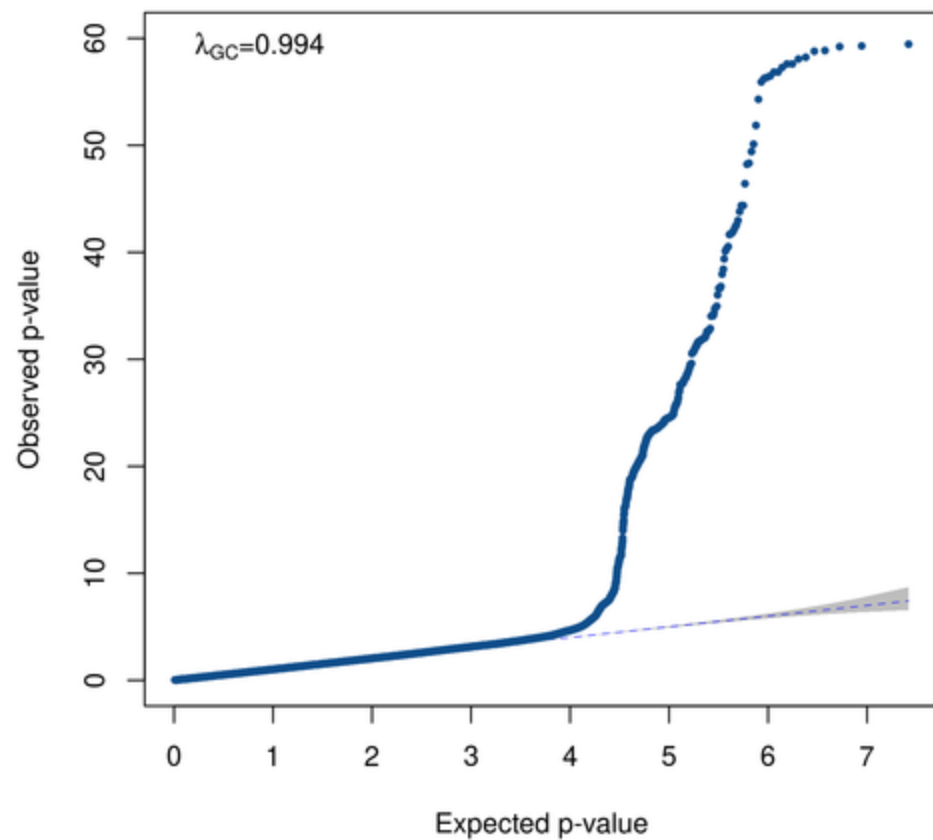

uPA (PLAU)

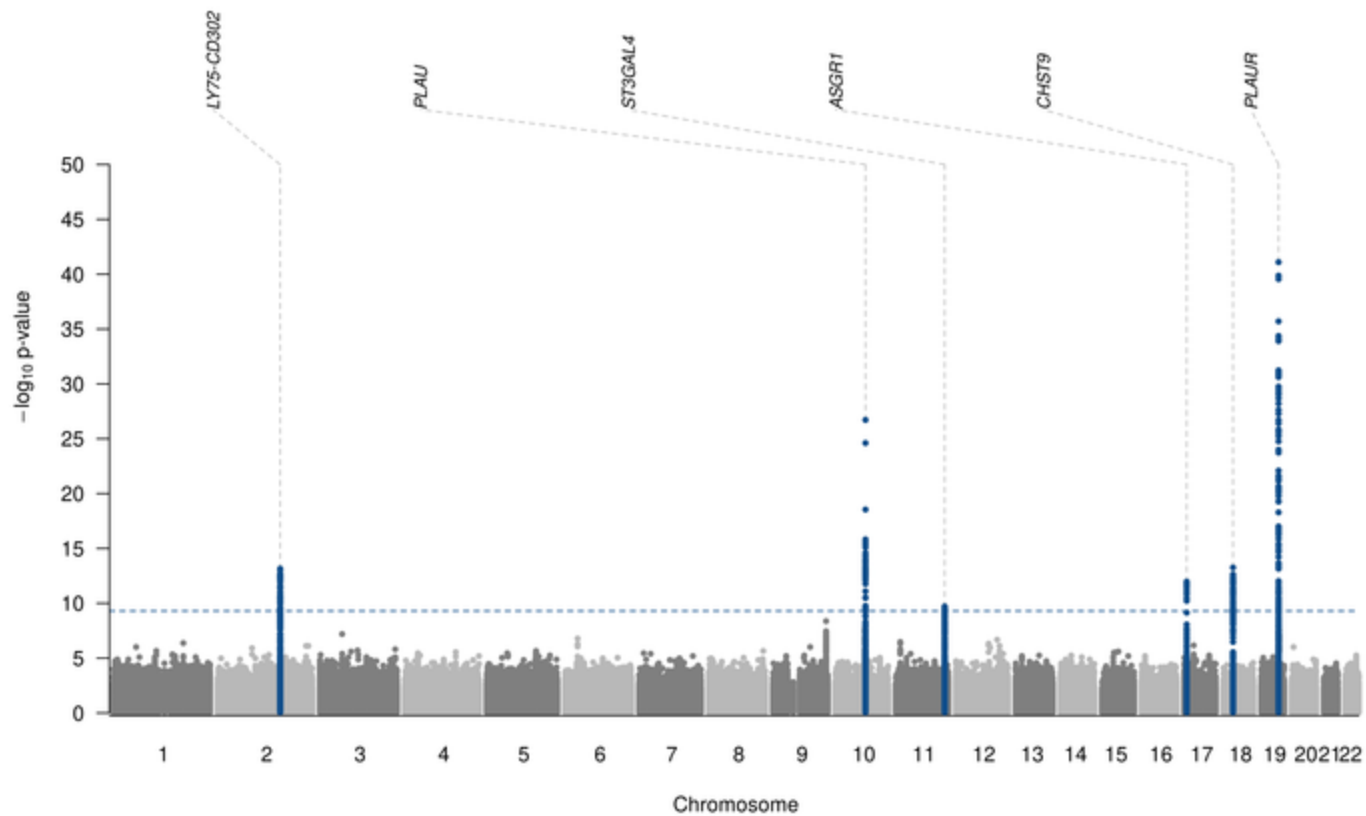

uPA (PLAU)

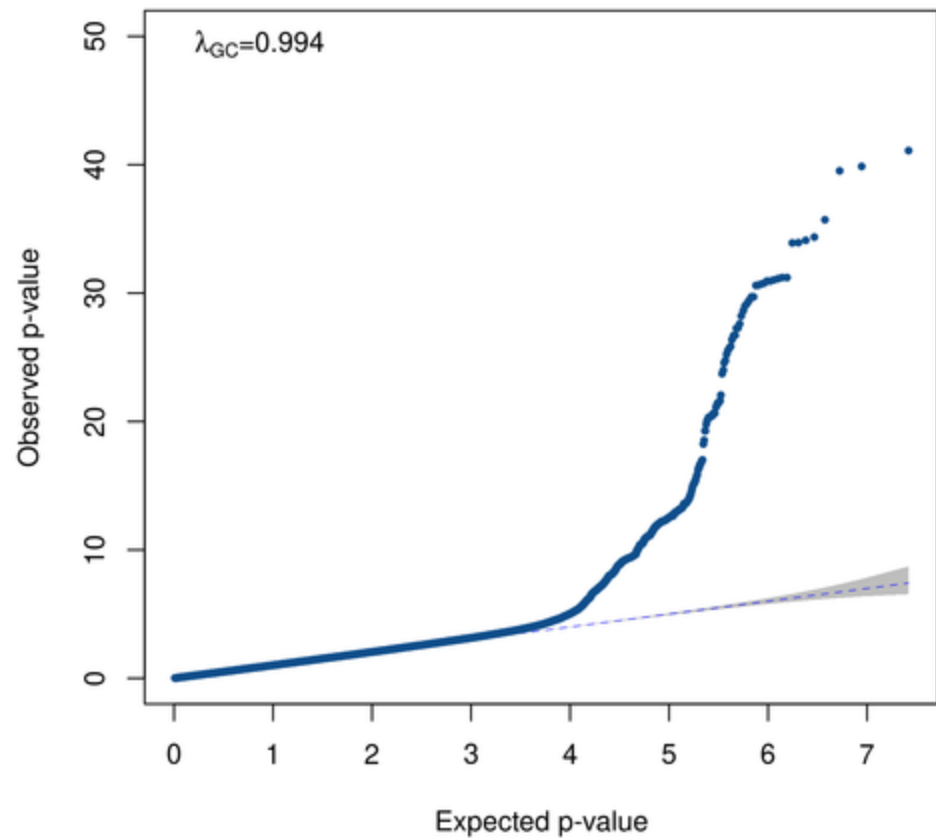

VEGF\_A (VEGFA)

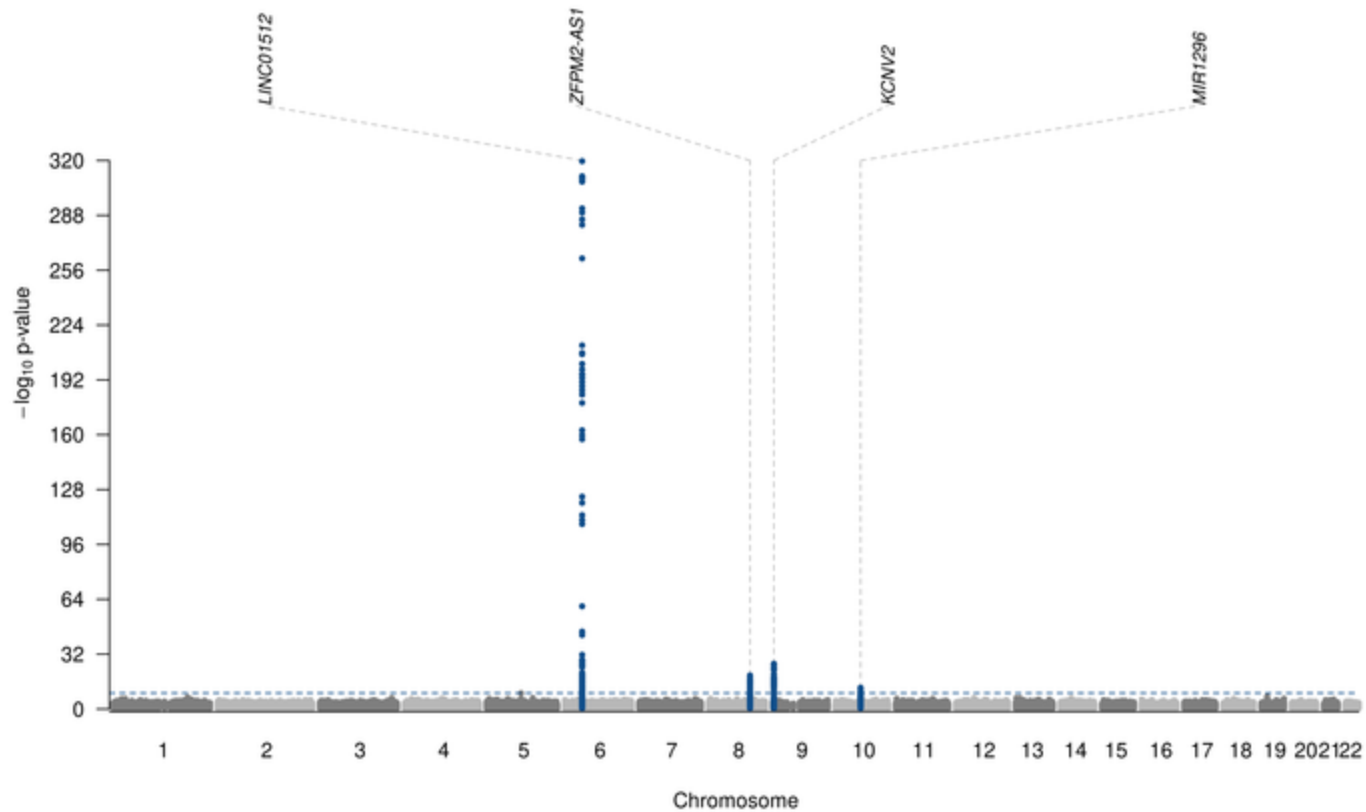

VEGF\_A (VEGFA)

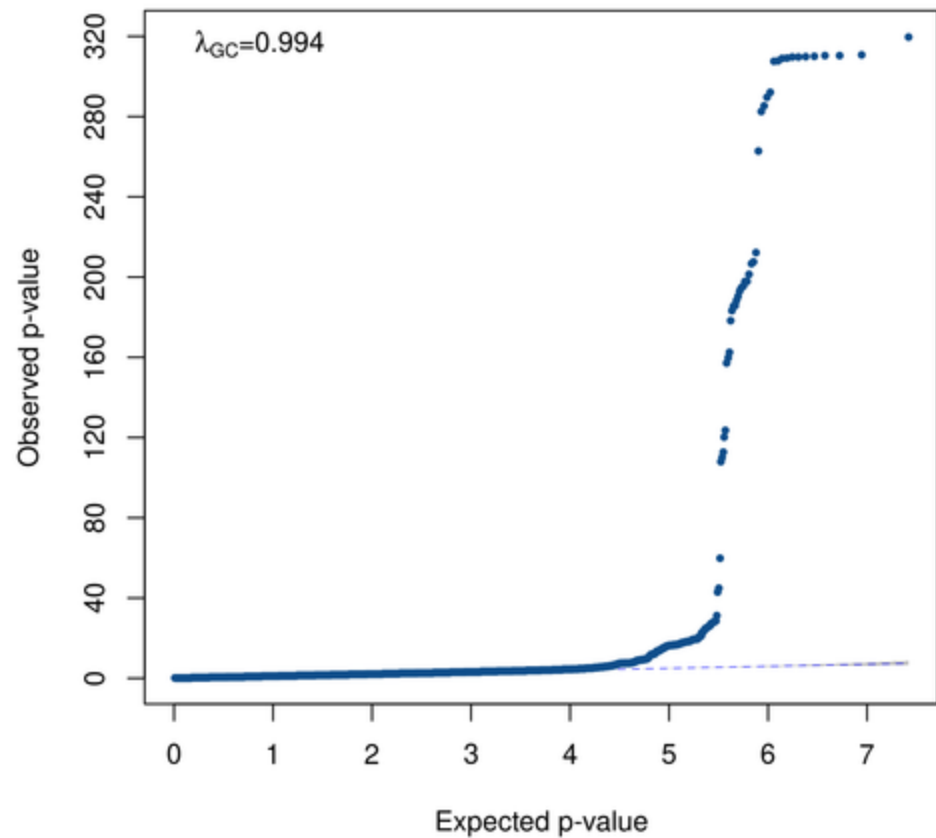

Supplement: Supplementary file [file media-1.pdf]
